# Supplementary material for: Prevalence and determinants of overweight/obesity among school-aged adolescents in the United Arab Emirates: a cross-sectional study of private and public schools
Source: PubMed Central journal article supplement — BMJ Open. 2020 Dec 12;10(12):e038667. doi: 10.1136/bmjopen-2020-038667 (PMC7735131; doi:10.1136/bmjopen-2020-038667), 2020-12-12
Supplement: bmjopen-2020-038667.draft_revisions.pdf [file bmjopen-2020-038667.draft_revisions.pdf]

# BMJ Open

BMJ Open is committed to open peer review. As part of this commitment we make the peer review history of every article we publish publicly available.

When an article is published we post the peer reviewers' comments and the authors' responses online. We also post the versions of the paper that were used during peer review. These are the versions that the peer review comments apply to.

The versions of the paper that follow are the versions that were submitted during the peer review process. They are not the versions of record or the final published versions. They should not be cited or distributed as the published version of this manuscript.

BMJ Open is an open access journal and the full, final, typeset and author-corrected version of record of the manuscript is available on our site with no access controls, subscription charges or pay-per-view fees (<http://bmjopen.bmj.com>).

If you have any questions on BMJ Open's open peer review process please email [info.bmjopen@bmj.com](mailto:info.bmjopen@bmj.com)

# BMJ Open

## Prevalence and determinants of overweight/obesity among school-aged adolescents in the United Arab Emirates: A comparative study of private and public schools

|                               |                                                                                                                                                                                                                                                                                                                                                                                                                                                                                                                                                                                                                                                                                                                                                                                                                                                                                                                                                                                                                                                                                                                                                                                  |
|-------------------------------|----------------------------------------------------------------------------------------------------------------------------------------------------------------------------------------------------------------------------------------------------------------------------------------------------------------------------------------------------------------------------------------------------------------------------------------------------------------------------------------------------------------------------------------------------------------------------------------------------------------------------------------------------------------------------------------------------------------------------------------------------------------------------------------------------------------------------------------------------------------------------------------------------------------------------------------------------------------------------------------------------------------------------------------------------------------------------------------------------------------------------------------------------------------------------------|
| Journal:                      | <i>BMJ Open</i>                                                                                                                                                                                                                                                                                                                                                                                                                                                                                                                                                                                                                                                                                                                                                                                                                                                                                                                                                                                                                                                                                                                                                                  |
| Manuscript ID                 | bmjopen-2020-038667                                                                                                                                                                                                                                                                                                                                                                                                                                                                                                                                                                                                                                                                                                                                                                                                                                                                                                                                                                                                                                                                                                                                                              |
| Article Type:                 | Original research                                                                                                                                                                                                                                                                                                                                                                                                                                                                                                                                                                                                                                                                                                                                                                                                                                                                                                                                                                                                                                                                                                                                                                |
| Date Submitted by the Author: | 21-Mar-2020                                                                                                                                                                                                                                                                                                                                                                                                                                                                                                                                                                                                                                                                                                                                                                                                                                                                                                                                                                                                                                                                                                                                                                      |
| Complete List of Authors:     | <p>baniissa, wegdan; University of Sharjah, Radwan, Hadia; University of Sharjah, Research Institute for Medical and Health Sciences, Clinical dietetics and nutrition<br/>           Awad, M. A.; Research Institute for Medical and Health Sciences, College of Dental Medicine-Department of Preventive &amp; Restorative Dentistry<br/>           Rossiter, Rachel; Charles Sturt University<br/>           Al-Yateem, Nabeel ; Research Institute for Medical and Health Sciences, College of Health Sciences, Department of Nursing, University of Sharjah, Sharjah, UAE<br/>           Fakhry, Randa; Research Institute for Medical and Health Sciences, College of Health Sciences, Department of Nursing, University of Sharjah, Sharjah, UAE<br/>           Enayah, Sana; Ajman University, 7Department of Clinical Sciences, College of Pharmacy and Health Sciences<br/>           Macridis, soultana; University of Alberta, Centre for Active Living Faculty of Kinesiology, Sport, and Recreation<br/>           Al shujairi, Arwa; 9Research Institute for Medical and Health Sciences, University of Sharjah<br/>           Ahmad, Abeer; Cairo University</p> |
| Keywords:                     | Nutrition < TROPICAL MEDICINE, PUBLIC HEALTH, NUTRITION & DIETETICS                                                                                                                                                                                                                                                                                                                                                                                                                                                                                                                                                                                                                                                                                                                                                                                                                                                                                                                                                                                                                                                                                                              |
|                               |                                                                                                                                                                                                                                                                                                                                                                                                                                                                                                                                                                                                                                                                                                                                                                                                                                                                                                                                                                                                                                                                                                                                                                                  |

SCHOLARONE™  
Manuscripts



I, the Submitting Author has the right to grant and does grant on behalf of all authors of the Work (as defined in the below author licence), an exclusive licence and/or a non-exclusive licence for contributions from authors who are: i) UK Crown employees; ii) where BMJ has agreed a CC-BY licence shall apply, and/or iii) in accordance with the terms applicable for US Federal Government officers or employees acting as part of their official duties; on a worldwide, perpetual, irrevocable, royalty-free basis to BMJ Publishing Group Ltd ("BMJ") its licensees and where the relevant Journal is co-owned by BMJ to the co-owners of the Journal, to publish the Work in this journal and any other BMJ products and to exploit all rights, as set out in our [licence](#).

The Submitting Author accepts and understands that any supply made under these terms is made by BMJ to the Submitting Author unless you are acting as an employee on behalf of your employer or a postgraduate student of an affiliated institution which is paying any applicable article publishing charge ("APC") for Open Access articles. Where the Submitting Author wishes to make the Work available on an Open Access basis (and intends to pay the relevant APC), the terms of reuse of such Open Access shall be governed by a Creative Commons licence – details of these licences and which [Creative Commons](#) licence will apply to this Work are set out in our licence referred to above.

Other than as permitted in any relevant BMJ Author's Self Archiving Policies, I confirm this Work has not been accepted for publication elsewhere, is not being considered for publication elsewhere and does not duplicate material already published. I confirm all authors consent to publication of this Work and authorise the granting of this licence.

1  
2  
3 **Prevalence and determinants of overweight/obesity among school-aged adolescents in**  
4  
5 **the United Arab Emirates: A comparative study of private and public schools**  
6  
7

8 \*Wegdan Bani Issa <sup>1</sup>, PhD, Associate Professor  
9 Hadia Radwan <sup>2</sup>, PhD, Assistant Professor  
10 Manal Awad <sup>3</sup>, PhD, Professor  
11 Rachel Rossiter <sup>4</sup>, HScD, Associate Professor  
12 Nabeel Al Yateem <sup>5</sup>, PhD, Associate Professor  
13 Randa Fakhry <sup>6</sup>, Lecturer  
14 Sana Enayah <sup>7</sup>, PharmD, PhD, Associate Professor  
15 Sultana Macridis <sup>8</sup>, PhD, Research Associate  
16 Arwa Al-Shujairi <sup>9</sup>, MPH, Research Assistant  
17 Abeer Ahmad <sup>10</sup>, Cairo University, Egypt  
18  
19  
20  
21  
22

23 <sup>1</sup>Research Institute for Medical and Health Sciences, College of Health Sciences, Department  
24 of Nursing, University of Sharjah, Sharjah, UAE

25 <sup>2</sup>Research Institute for Medical and Health Sciences, College of Health Science-Department  
26 of Clinical Nutrition, University of Sharjah-UAE

27 <sup>3</sup> Research Institute for Medical and Health Sciences College of Dental Medicine-Department  
28 of Preventive & Restorative Dentistry, University of Sharjah- UAE

29 <sup>4</sup>Charles Sturt University, Australia

30 <sup>5</sup>Research Institute for Medical and Health Sciences, College of Health Sciences, Department  
31 of Nursing, University of Sharjah, Sharjah, UAE

32 <sup>6</sup>Research Institute for Medical and Health Sciences, College of Health Sciences, Department  
33 of Nursing, University of Sharjah, Sharjah, UAE

34 <sup>7</sup>Department of Clinical Sciences, College of Pharmacy and Health Sciences, Ajman  
35 University, Ajman, UAE

36 <sup>8</sup>Centre for Active Living-Faculty of Kinesiology, Sport, and Recreation, Canada University  
37 of Alberta, Alberta, Canada

38 <sup>9</sup>Research Institute for Medical and Health Sciences, University of Sharjah, UAE

39 <sup>10</sup>University of Cairo, Faculty of physical Therapy, Egypt.  
40  
41  
42  
43  
44

45 **\*Corresponding author:**

46 Wegdan Bani Issa, PhD, MSN, RN  
47 Associate Professor  
48 College of Health Sciences  
49 University of Sharjah  
50 P. O. Box 27272 Sharjah  
51 United Arab Emirates  
52 Phone: +971-65057522  
53 Email: [wbanissa@sharjah.ac.ae](mailto:wbanissa@sharjah.ac.ae)  
54  
55  
56  
57

58 Word count: 3489  
59  
60

## ABSTRACT

**Objectives** The United Arab Emirates (UAE) identified child and adolescent obesity rates as a target for action. We clarified the prevalence of obesity among adolescents attending UAE private and public schools and identified contributing factors.

**Design** This study used a cross-sectional design using cluster sampling technique.

**Settings** Private and public secondary schools across the UAE, 2018-2019.

**Participants** A total of 1224 adolescents both males and females, aged 13–19 years, recruited in the current study of which 932 completed the surveys and measurements.

**Outcome measures** We used self-report questionnaires to collect sociodemographic data and assess fruit/vegetable consumption and physical activity. Participants' anthropometric indices were measured.

**Results** In total, 34.7% of participants were overweight/obese; 20.2% in public and 14.5% in private schools. We found significantly higher anthropometric indices among public school participants compared with private school participants. Overweight/obese participants had significantly lower fruit/vegetable consumption and were less active than their underweight or normal weight peers.

**Conclusion** This study highlights an urgent need for focused nutritional and physical activity interventions targeting adolescents in secondary schools.

**Keywords:** Adolescents, obesity, public schools, private schools, anthropometric indices, fruit and vegetable consumption, physical activity.

Word count: 3489

### Strengths and limitations of this study

- This study was the first in the Arabian region to assess obesity and its determinants utilizing a representative sample of adolescents from private and public schools across the United Arab Emirates.
- The study included multiple variables related to obesity, including abdominal obesity indicators, blood pressure measurement, physical activities and lifestyle factors.
- This study used a cross-sectional design and causality cannot be assumed.
- The data collection process was lengthy as it involved many parameters and measurements that impacted the number of students who agreed to participate.

Peer review only

## Introduction

Adolescence is a transitional developmental period characterized by changes in physical, intellectual, social, and emotional health. Optimal growth during adolescence is important for maintaining good health throughout the life course. Obesity among adolescents is a serious health problem and public health issue that demands urgent attention. <sup>1</sup> Globally, the prevalence of overweight/obesity has increased among children and adolescents. For example, the global prevalence was 4% in 1975, whereas the 2016 estimate was over 18%; this increase was similar among boys and girls (19% and 18%, respectively). <sup>2</sup> Increasing overweight and obesity are also issues for Middle Eastern and North African countries, especially as rapid increases in obesity have been observed among children and adolescents<sup>3</sup>. A large-scale epidemiological study (n=44,942) conducted in Ras Al Khaimah confirmed obesity was steadily increasing in those aged 3–18 years; each year an additional 2.36% were classified as obese and 0.28% as extremely obese. <sup>4</sup> In 2014, a global action plan that aimed to prevent and control noncommunicable diseases was adopted by the World Health Assembly. <sup>1</sup> This action plan highlighted the importance of measures to address obesity rates globally, including among children and adolescents. Many countries have reflected the need to focus on reducing and preventing obesity among young people in national policies and strategies; for example, the United Arab Emirates (UAE) has included obesity among children as an indicator in the Vision 2021 National Agenda. <sup>5</sup>

In addition to causing health problems in childhood and adolescence, overweight and obesity among young people can have long-term health impacts into adulthood (e.g., cardiovascular disease, insulin resistance, type 2 diabetes mellitus, psychosocial complications). <sup>6</sup> Childhood obesity can also predict obesity in adulthood. A long-term follow-up study indicated efforts to influence body mass index (BMI) over the life course should begin early (e.g., before 6 years), and noted the progression toward a high BMI begins

1  
2  
3 in adolescence for boys and young adulthood for girls.<sup>8</sup> These studies highlight that early  
4 intervention is important to prevent increased BMI and associated health risks, which also  
5 contribute to increased healthcare expenditure.<sup>8</sup>  
6  
7

8  
9  
10 Various external factors that influence obesity have changed in recent years, such as rapid  
11 changes in dietary practices (e.g., fast food, processed foods), extensive use of technology  
12 (e.g., the Internet and mobile devices), and increasingly sedentary lifestyles. Such  
13 developments have been associated with high obesity rates among adolescents, especially in  
14 developing countries.<sup>9</sup> In particular, the rapid socioeconomic transition in Middle Eastern and  
15 North African countries has resulted in increased urbanization and drastic changes in  
16 lifestyles, manifested in low physical activity and unhealthy dietary practices.<sup>3</sup> These factors  
17 combined with the growing fast food industry have led to various nutritional-related chronic  
18 conditions among adolescents, including obesity.<sup>9</sup>  
19  
20  
21  
22  
23  
24  
25  
26  
27  
28  
29

30  
31 The UAE has also witnessed rapid economic development and corresponding changes in  
32 lifestyles, leading to a marked increase in obesity in children/adolescents. Recently, the  
33 Global School-based Student Health Survey reported the obesity prevalence in the UAE  
34 youth population (aged 13–15 years) was 16.2%.<sup>10</sup> Previous cross-sectional studies from  
35 different cities across the UAE have also shown increased rates of obesity in adolescents,  
36 with the reported prevalence ranging from 18.9% in Abu Dhabi<sup>11</sup> to 35% in Dubai.<sup>12</sup>  
37  
38  
39  
40  
41  
42  
43

44  
45 Given the increased prevalence of obesity, it is important to clarify factors that contribute  
46 to obesity. School type (e.g., public, private) may be a key determinant of obesity, as students  
47 spend much of their day in school. Previous studies investigated differences in obesity rates  
48 between public and private schools. For example, one study found that many students  
49 attending public schools were obese and had low physical activity, low fruit/vegetable  
50 consumption, and low intakes of water, fiber, vitamins, and minerals.<sup>13</sup> Another study found  
51 that children attending public schools had a high BMI and a greater likelihood of being  
52  
53  
54  
55  
56  
57  
58  
59  
60



1  
2  
3 overweight compared with children attending private schools.<sup>14</sup> However, other studies have  
4 reported opposite trends. Studies conducted in different countries like Pakistan, Kenya, and  
5 India, all reported private school students had higher rates of obesity compared with those  
6 attending public schools.<sup>15-17</sup> Another study conducted in Shanghai also reported more  
7 students at private schools were overweight compared with those at public schools.<sup>18</sup> That  
8 study also noted that this difference may be explained by diet, socioeconomic status, school  
9 environment, and factors related to infancy.

10  
11  
12  
13  
14  
15  
16  
17  
18  
19  
20  
21  
22  
23  
24  
25  
26  
27  
28  
29  
30  
31  
32  
33  
34  
35  
36  
37  
38  
39  
40  
41  
42  
43  
44  
45  
46  
47  
48  
49  
50  
51  
52  
53  
54  
55  
56  
57  
58  
59  
60  
Most previous studies conducted in the UAE focused on the prevalence of obesity and did not consider the type of school and how this related to obesity or its determinants. This study sought to understand the prevalence of obesity in school-aged adolescents in the UAE and clarify factors contributing to obesity in this population. By mapping and rigorously assessing adolescents' obesity-related health status, healthcare providers, policy makers, schools, and families will be able to collaborate to develop appropriate evidence-based approaches to promote adolescent health.

In this study, we explored the epidemiology of overweight and obesity and identify determinants of factors contributing to obesity in adolescents in the UAE using a representative sample of adolescents from private and public schools.

## **METHODS**

### **Study Design and Setting**

We adopted a quantitative correlational design. The sample was drawn from intermediate and high schools that were randomly selected from lists obtained from the Ministry of Education and other private/public school governing bodies in the UAE's seven emirates (Sharjah, Dubai, Abu Dhabi, Ajman, Ras Al Khaimah, Fujairah, and Umm Al Quwain). This study was reported according to the STROBE checklist for reports of cross-sectional studies (see supplementary File 1).

## Participants

Based on an overweight/obesity prevalence of 40% among UAE adolescents,<sup>11</sup> a 3% margin of error, 95% confidence interval (CI), and significance level of 0.05, a sample size of 1124 adolescents was needed. An additional 100 participants were included to allow for non-response, meaning we aimed to recruit 1224 participants for this study. The sample included male and female students in grades 9–12 (aged 13–19 years) of any nationality whose parents provided consent for them to participate. We excluded students with chronic diseases such as type 2 diabetes, cancer, and mental health conditions, based on information from students' school records. The principals of each school provided access to students depending on participating schools' class schedules and students' availability. Convenience sampling was then used to select students from the identified classrooms until the required sample size was reached.

## Data Collection

Figure 1 presents a flowchart of the data collection process. Participating students completed a self-report questionnaire covering demographic information, fruit/vegetable consumption, and physical activity. Trained research assistants administered the questionnaire in participating students' classrooms. Participating students were then directed to the on-site school clinic where anthropometric measurements, SBP, DBP, and random capillary blood glucose were collected by trained research assistants. Data collected over 10 months from 2018-2019.

**General demographic information.** Information on participants' general characteristics was collected using self-report tools. Data collected included age, sex, nationality, country of origin, current medical conditions, and type of school (private vs. public). We also collected

1  
2  
3 information on parents' level of education, employment (employed/unemployed), and income  
4  
5 (below average/average/above average) as reported by students.  
6  
7

8 **Physical activity.** We collected information concerning participants' physical activity  
9  
10 using the Physical Activity Questionnaire for Adolescents (PAQ-A). This tool is a 7-day  
11  
12 recall self-report questionnaire with nine-items.<sup>19</sup> The PAQ-A was originally developed to  
13  
14 evaluate physical activity levels among high school students (aged 14–19 years). Responses  
15  
16 are on a 5-point Likert-scale, and the nine items are summed to give a total physical activity  
17  
18 score. A high mean score indicates a high level of physical activity. The English version of  
19  
20 the PAQ-A has high reliability (Cronbach's alpha: 0.77–0.88) and high concurrent validity.<sup>20</sup>  
21  
22 The Arabic version of the scale demonstrated good reliability and validity parameters when  
23  
24 used in Arabic children and adolescents.<sup>21</sup> The estimated completion time for the PAQ-A is  
25  
26 20 minutes.<sup>20</sup>  
27  
28  
29

30  
31 **Fruit and vegetable consumption.** We based assessment of fruit/vegetable consumption  
32  
33 on participants' self-report using the National Cancer Institute (NCI) Fruit and Vegetable  
34  
35 Screener.<sup>22</sup> This instrument covers the frequency/amount consumed of specific items. These  
36  
37 include: 100% fruit juice, fruit (e.g., fresh, canned, frozen), fried potatoes (e.g., French fries),  
38  
39 other potatoes, dried beans, other vegetables, and tomato-based sauces (e.g., pasta, pizza).  
40  
41 The instrument also evaluates the frequency of consumption of vegetable combinations (e.g.,  
42  
43 sandwiches, salads, casseroles/stews, stir-fries). We calculated servings per day using NCI  
44  
45 standard scoring algorithms.<sup>23</sup> The English version of the scale has been reported to have  
46  
47 excellent reliability and validity in both adults and adolescents.<sup>24</sup> The scale also had  
48  
49 acceptable reliability (Cronbach's alpha: 0.82) and predictive validity among Saudi young  
50  
51 adults.<sup>24</sup>  
52  
53  
54  
55

56 **Anthropometric measurements.** Anthropometric indices measured included waist and  
57  
58 hip circumference (WC and HC, respectively), waist to hip ratio (WHR), waist to height ratio  
59  
60

1  
2  
3 (WHtR), and percentage of body fat (%BF). For these measurements, students removed their  
4 shoes and wore minimal light-weight clothing as per World Health Organization (WHO)  
5 guidelines.<sup>25</sup> We measured participants' height (to the nearest 0.1 cm) and weight (to the  
6 nearest 0.1 kg) using a telescopic measuring rod (Seca 220) for column scales. Two  
7 measurements for WC and HC were recorded for each participant using an inextensible  
8 anthropometric tape (Seca 201). These measurements were taken while participants stood  
9 erect with their arms by their sides and feet close together.

10  
11  
12 We calculated participants' WHtR by dividing WC by height. We used 0.5 as the cut-off  
13 point to define abdominal obesity (26-27). We calculated WHR by dividing participants' WC  
14 by their HC.<sup>26</sup> We calculated and classified BMI (weight [kg] divided by height [m<sup>2</sup>])  
15 according to WHO criteria:<sup>27</sup> underweight (BMI <3rd percentile); normal weight (BMI  
16 between the 3rd and 85th percentiles); overweight (BMI between the 85th and 97th  
17 percentiles); and obese (BMI >97th percentile).<sup>25</sup>

18  
19  
20 Participants' %BF was measured using the Body Composition Analyzer (TANITA MC  
21 780 multi-frequency segmental body composition analyzer). This device measured  
22 participants' body composition parameters by evaluating differences in impedance of body  
23 components (e.g., muscle and lean tissue). Various body composition parameters are  
24 automatically calculated, including total body muscle and fat mass, total body water, total  
25 body fat and water ratios, muscle mass of the arms/legs, BMI, and basal metabolic rate. This  
26 technology has been shown to be valid and reliable.<sup>28</sup>

27  
28  
29 Capillary random blood sugar was measured by an ACCU Check Blood Glucose Meter,  
30 with values of 126 mg/dl or higher indicative of diabetes.<sup>29</sup> An Omron digital basic BP  
31 machine was used to measure BP; 120/80 mmHg in the 95th percentile or greater was  
32 considered a determinant of hypertension.<sup>30</sup>

### 33 34 35 36 37 38 39 40 41 42 43 44 45 46 47 48 49 50 51 52 53 54 55 56 57 58 **Data Analysis** 59 60

1  
2  
3 We calculated descriptive statistics for the study variables. Next, we compared differences in  
4 categorical sociodemographic variables by school type (private vs. public) using chi-square,  
5  
6 and performed independent sample t-tests to identify statistically significant differences  
7  
8 between continuous independent variables (anthropometric measurements, physical activity,  
9  
10 fruit/vegetable consumption) and school type.  
11  
12  
13

14 We combined overweight and obesity in a single category and considered BMI-by-age  
15  $\geq 85\%$  as indicator of overweight and obesity. We then analyzed variables to find  
16  
17 determinants of overweight/obesity using logistic regression analysis. This model calculated  
18  
19 odds ratios (OR) and 95% CIs. Significance was set at  $p < 0.05$ . We used SAS version 9.4 for  
20  
21 all statistical analyses.  
22  
23  
24

## 25 26 **Ethical Considerations**

27  
28 Ethical approval to conduct this study was obtained from the Research Ethics Committee at  
29  
30 the principal investigator's institution (REC/15/12/10), the UAE Ministry of Health and  
31  
32 Prevention (MOHAP REC-11). Parental consent was obtained for each student that agreed to  
33  
34 participate in this study.  
35  
36  
37

## 38 **RESULTS**

### 39 40 **Sample Characteristics and Anthropometric Results**

41  
42 Table 1 presents participants' characteristics. Of the 1224 adolescents who participated in this  
43  
44 study, complete data were available for 932 participants (76.1% response rate). Major reasons  
45  
46 for not participating is lacking of interest in the study. Of these, 434 (46.6%) attended private  
47  
48 schools and 498 (53.4%) attended public schools. Participants' average age was  $15.8 \pm 1.43$   
49  
50 years; 311 (33.4%) were male and 621 (66.6%) were female. The majority of participants  
51  
52 were UAE nationals (61.1%). More than two-thirds of participants' mothers were not  
53  
54 employed ( $n=682$ , 73.2%) and the majority (58%) had an average family income (based on  
55  
56  
57  
58  
59  
60

participant's self-report). Participants' mean fruit and vegetable consumption score was  $3.1 \pm 1.83$  and mean PAQ-A score was  $2.3 \pm 0.71$ .

Table 1

**Characteristics of Participating Adolescents (N = 932)**

| Characteristics                                              | Frequency (%) or mean $\pm$ SD |
|--------------------------------------------------------------|--------------------------------|
| Gender                                                       |                                |
| Male                                                         | 311 (33.4)                     |
| Female                                                       | 621 (66.6)                     |
| Age (years)                                                  | 15.8 $\pm$ 1.43                |
| Nationality                                                  |                                |
| UAE National                                                 | 569 (61.1)                     |
| Non-UAE National                                             | 363 (38.9)                     |
| Type of school                                               |                                |
| Public                                                       | 498 (53.4)                     |
| Private                                                      | 434 (46.6)                     |
| Mother's employment                                          |                                |
| Employed                                                     | 250 (26.8)                     |
| Unemployed                                                   | 682 (73.2)                     |
| Economic status                                              |                                |
| Below average                                                | 32 (3.4)                       |
| Average                                                      | 541 (58.1)                     |
| Above average                                                | 359 (38.5)                     |
| Fruits and vegetables score <sup>a</sup>                     | 3.1 $\pm$ 1.83                 |
| Physical Activity Questionnaire for Adolescents <sup>b</sup> | 2.3 $\pm$ 0.71                 |
| BMI-age percentile                                           | 61.8 $\pm$ 33.0                |
| Underweight                                                  | 79 (8.4)                       |
| Normal                                                       | 530 (56.9)                     |
| Overweight                                                   | 158 (17.0)                     |
| Obese                                                        | 165 (17.7)                     |
| Waist circumference <sup>c</sup>                             | 76.8 $\pm$ 13.3                |
| Normal                                                       | 491 (52.6)                     |
| Above normal                                                 | 441 (47.4)                     |
| Waist-hip ratio (cm)                                         | 0.83 $\pm$ 0.07                |
| Normal                                                       | 720 (77.3)                     |
| Abnormal                                                     | 212 (22.7)                     |
| Waist-height ratio (cm)                                      | 0.47 $\pm$ 0.08                |
| Normal                                                       | 679 (72.9)                     |
| Abnormal                                                     | 253 (27.1)                     |
| Percent body fat                                             | 27.6 (12.0)                    |
| Glucose (random)                                             | 93.3 $\pm$ 23.7                |
| Blood pressure (mmHg)                                        |                                |

|           |            |
|-----------|------------|
| Systolic  | 119.2±43.3 |
| Diastolic | 74.6±9.9   |

<sup>a</sup> score reflects the number of servings of fruits and vegetables per day; <sup>b</sup> score of 2.75 or lower considered inactive; <sup>c</sup> threshold based on age and gender. SD, standard deviation.

## Epidemiology of Obesity for all Participants

BMI-by-age percentiles indicated the majority of participants had normal weight (56.9%). In total, 323 participants (34.7%) were overweight (17.0%) or obese (17.7%). Abdominal obesity was prevalent among 47.4% of participants estimated by WC, 22.7% estimated by WHR, and 27.1% estimated by WHtR. The mean %BF was 27.6% (SD 12.0%) (Table 1).

## Private Versus Public Schools

Table 2 below shows the associations between sociodemographic factors, lifestyle variables, and anthropometric indices by school type. The majority of participants attending public schools were of Emirati nationality with an average family income ( $p<0.001$ ). Participants attending public schools had significantly higher BMI (overweight or obese) compared with those from private schools ( $p=0.001$ ). Moreover, public school participants had significantly larger WC ( $p=0.028$ ), higher mean WHtR ( $p<0.000$ ), higher mean %BF ( $p=0.001$ ), and higher SBP and DBP ( $p=0.001$  and  $p=0.002$ , respectively) than those attending private schools (Table 2).

Table 2

**Comparisons Between Private And Public Schools (N = 932)**

|                                                              | Public schools<br>n (%), mean±SD<br>(n=498) | Private schools<br>n (%), mean±SD<br>(n=434) | p-value |
|--------------------------------------------------------------|---------------------------------------------|----------------------------------------------|---------|
| Gender                                                       |                                             |                                              | 0.694   |
| Male                                                         | 169 (18.2)                                  | 142 (15.2)                                   |         |
| Female                                                       | 329 (35.3)                                  | 292 (31.3)                                   |         |
| Nationality                                                  |                                             |                                              | <0.000† |
| UAE National                                                 | 407 (43.6)                                  | 162 (17.4)                                   |         |
| Non-UAE National                                             | 91 (9.8)                                    | 272 (29.2)                                   |         |
| Mother's employment                                          |                                             |                                              | 0.123   |
| Employed                                                     | 144 (15.4)                                  | 106 (11.4)                                   |         |
| Unemployed                                                   | 354 (38.0)                                  | 328 (35.2)                                   |         |
| Economic status                                              |                                             |                                              | <0.000† |
| Below average                                                | 30 (3.2)                                    | 2 (0.2)                                      |         |
| Average                                                      | 374 (40.1)                                  | 167 (17.9)                                   |         |
| Above average                                                | 94 (10.1)                                   | 265 (28.5)                                   |         |
| Fruits and vegetables score <sup>a</sup>                     | 3.0±1.7                                     | 3.1±1.9                                      | 0.232   |
| Physical Activity Questionnaire for Adolescents <sup>b</sup> | 2.2±0.70                                    | 2.2±0.62                                     | 0.543   |
| BMI                                                          |                                             |                                              | 0.001†  |
| Underweight                                                  | 44 (4.7)                                    | 35 (3.8)                                     |         |
| Normal                                                       | 266 (28.5)                                  | 264 (28.3)                                   |         |
| Overweight                                                   | 77 (8.3)                                    | 81 (8.7)                                     |         |
| Obese                                                        | 111 (11.9)                                  | 54 (5.8)                                     |         |
| Waist circumference <sup>c</sup>                             |                                             |                                              | 0.028†  |
| Normal                                                       | 247 (26.5)                                  | 246 (26.4)                                   |         |
| Above normal                                                 | 251 (27.0)                                  | 187 (20.1)                                   |         |
| Waist-hip ratio (cm)                                         | 0.83±0.07                                   | 0.83±0.06                                    | 0.283   |
| Waist-height ratio (cm)                                      | 0.48±0.08                                   | 0.46±0.06                                    | <0.000† |
| Percent body fat                                             | 27.6±10.4                                   | 25.3±8.9                                     | 0.000†  |
| Glucose (random)                                             | 92.9±26.6                                   | 93.5±17.7                                    | 0.700   |
| Blood pressure (mmHg)                                        |                                             |                                              |         |
| Systolic                                                     | 119.4±12.3                                  | 116.5±12.4                                   | 0.001†  |
| Diastolic                                                    | 75.6±10.1                                   | 73.7±9.1                                     | 0.002†  |



<sup>a</sup>score reflects the number of servings of fruits and vegetables per day; <sup>b</sup> score of 2.75 or lower considered inactive; <sup>c</sup> threshold based on age and gender. SD, standard deviation.

## Determinants of Overweight and Obesity

The logistic regression analysis showed that school type, fruit/vegetable consumption score, PAQ-A score, SBP, and DBP were significantly associated with BMI (Table 3 below). Participants from public schools were more likely to be overweight or obese than private school participants (OR 1.34, 95% CI: 1.02–1.76). Overweight/obese participants were significantly less likely to consume fruits and vegetables or engage in physical activity compared with their peers who were underweight (OR 0.79, 95% CI: 0.72–0.86) or normal weight (OR 0.54, 95% CI: 0.38–0.78). In addition, overweight/obese participants had significantly higher odds of having high SBP and DBP compared with participants that were underweight (OR 1.03, 95% CI: 1.02–1.04) and of normal weight (OR 1.02 95% CI: 1.00–1.03). Finally, participants that were overweight/obese had higher odds of having larger anthropometric indices (WC, WHR, WHtR, and %BF).

Table 3

### Simple Logistic Regression Analysis For Associations Of Sample Characteristics With Overweight/Obesity (N = 932)

| Sample characteristics                                       | OR (95% CI)       | p-value |
|--------------------------------------------------------------|-------------------|---------|
| Gender                                                       |                   | 0.231   |
| Male                                                         | Ref               |         |
| Female                                                       | 0.84 (0.63–1.12)  |         |
| Nationality                                                  |                   | 0.052   |
| UAE national                                                 | Ref               |         |
| Non-UAE national                                             | 0.76 (0.57–1.00)  |         |
| Mother's employment                                          |                   | 0.800   |
| Unemployed                                                   | Ref               |         |
| Employed                                                     | 0.96 (0.71–1.30)  |         |
| Economic status                                              |                   | 0.154   |
| Below average                                                | 0.83 (0.62–1.11)  |         |
| Average                                                      | Ref               |         |
| Above average                                                | 1.60 (0.77–3.23)  |         |
| Type of school                                               |                   | 0.034†  |
| Private                                                      | Ref               |         |
| Public                                                       | 1.34 (1.02–1.76)  |         |
| Fruits and vegetables score <sup>a</sup>                     | 0.79 (0.72–0.86)  | <0.000† |
| Physical Activity Questionnaire for Adolescents <sup>b</sup> |                   | 0.001†  |
| Low intensity                                                | Ref               |         |
| Moderate high intensity                                      | 0.54 (0.38–0.78)  |         |
| Waist circumference <sup>c</sup>                             |                   | <0.000† |
| Normal                                                       | Ref               |         |
| Abnormal                                                     | 9.49 (6.83–13.03) |         |
| Waist-hip ratio (cm)                                         |                   | 0.001†  |
| Normal                                                       | Ref               |         |
| Abnormal                                                     | 1.71 (1.25–2.33)  |         |
| Glucose                                                      |                   | 0.217   |
| Normal                                                       | Ref               |         |
| Abnormal                                                     | 1.44 (0.81–2.58)  |         |
| Waist-height ratio (cm)                                      |                   | <0.000† |
| Normal                                                       | Ref               |         |
| Abnormal                                                     | 20.3 (14.0–29.5)  |         |
| Percent body fat                                             | 1.19 (1.16–1.22)  | <0.000† |
| Blood pressure (mmHg)                                        |                   |         |

|           |                  |         |
|-----------|------------------|---------|
| Systolic  | 1.03 (1.02–1.04) | <0.000† |
| Diastolic | 1.02 (1.00–1.03) | 0.009†  |

<sup>a</sup> score reflects the number of servings of fruits and vegetables a day; <sup>b</sup> score of 2.75 or lower considered inactive; <sup>c</sup> threshold based on age and gender. OR, odds ratio; CI, confidence interval.

## DISCUSSION

This study contributed new information regarding the epidemiology and determinants of overweight/obesity among UAE school-aged adolescents. We found a high prevalence of overweight/obesity among participants (34.7%), which supports previous UAE-based epidemiological studies.<sup>4 11 12</sup> The high prevalence of overweight/obesity observed in our study was also consistent with studies from other Arab countries, including Saudi Arabia (39%),<sup>31</sup> Kuwait (44.3%),<sup>32</sup> Lebanon (32.2%),<sup>33</sup> and Egypt (35%).<sup>34</sup> Conversely, studies conducted in Western countries reported lower obesity rates compared with our study. For example, the obesity rate among adolescents in European countries was 22%–25%, although higher rates were reported among American adolescents (30%).<sup>35</sup> Lower obesity rates were also reported in Italy (23.3%)<sup>36</sup> and Greece (overweight 19.1%, obesity 3.2%).<sup>37</sup> However, these variations may be attributable to geographical locations and differing lifestyles, along with different cut-off values for interpreting BMI results.

A concerning finding in our study was that abdominal obesity indicators were high (WC 47.4%, WHR 22.8%, and WHtR 27.2%). However, the literature indicates some inconsistency in indices used to determine abdominal obesity. For example, El Kassas and Ziade<sup>33</sup> reported central obesity rates evaluated by WC (41.8%) and WHtR (38.3%). Similarly, Al Hazza et al.<sup>31</sup> reported abdominal obesity using WHtR (35.9% for adolescent males and 30.3% for females). Abolfotouh et al.<sup>34</sup> reported abdominal obesity among Egyptian adolescents using WHR (16.1%), WC (4.5%), and WHtR (16.7%). However, our results are of concern regardless of variations in indices used to determine abdominal obesity. Visceral adiposity (as measured by WC, WHR, and WHtR) is associated with an increased

1  
2  
3 risk for obesity-related morbidity and mortality. Excess weight gain in childhood and  
4  
5 adolescence may lead to lifelong overweight/obesity, which is associated with greater risks  
6  
7 for and earlier onset of metabolic disorders.<sup>3 8</sup>

9  
10 We found that participating adolescents showed low physical activity levels and low  
11  
12 fruits/vegetables consumption. A recent UAE study reported that around 28% of Emirati  
13  
14 adolescents had the recommended daily intake of fruits/vegetables.<sup>38</sup> Our participants also  
15  
16 showed low levels of physical activity. This was consistent with a global estimate from the  
17  
18 WHO that 81% of those aged 11–17 years did not meet daily physical activity  
19  
20 recommendations.<sup>39</sup> Physical inactivity and low fruit and vegetable consumption in  
21  
22 adolescence may persist throughout adulthood, increasing the risk for chronic lifelong  
23  
24 diseases.<sup>39</sup>

### 25 26 27 28 **Obesity in Public Versus Private Schools**

29  
30 Interestingly, we found a higher prevalence of obesity in adolescents from public schools  
31  
32 than among adolescents from private schools. Differences in obesity rates between private  
33  
34 and public schools have been reported in different countries. A study examining obesity rates  
35  
36 among students in Palermo reported more public school students were overweight/obese  
37  
38 compared with private school students (age 13 years: 40.8% vs. 34.5%; age 15 years: 36.7%  
39  
40 vs. 30.2%).<sup>13</sup> Other studies have reported contrasting findings. A Kenyan study found that  
41  
42 overweight/obesity rates were significantly higher (29.0%) among private school children  
43  
44 than those from public schools (11.5%) (16). Similar trends of higher obesity rates in private  
45  
46 schools compared with public schools were observed in studies from India,<sup>17</sup> Pakistan,<sup>15</sup>  
47  
48 and Saudi Arabia.<sup>31</sup>

49  
50 In our study, public school students had significantly higher abdominal obesity  
51  
52 indicators (WC, WHtR, and %BF) than private school students. Most previous studies in the  
53  
54 UAE reported BMI rates and did not examine these obesity indicators. Similarly, other  
55  
56  
57  
58  
59  
60

1  
2  
3 studies that compared private and public schools in various countries did not compare  
4 abdominal obesity indicator.<sup>13 15 16 18</sup> Our results highlighted the importance of measuring  
5 anthropometric indices as obesity indicators (e.g., WC, WHC, WHtR, and %BF) when  
6 screening adolescents. We also noted that private school participants had higher SBP and  
7 DBP compared with public school participants, which may indicate an increased risk for  
8 developing cardiovascular disease in adulthood.<sup>40</sup> Primary prevention measures may be  
9 necessary to prevent the long-term negative impact of obesity on cardiovascular and  
10 metabolic health in adulthood.

### 21 **Determinants of obesity**

22 Our investigation highlighted the importance of evaluating WC, WHR, WHtR, and %BF.  
23 Overweight/obese participants with high WC and WHtR had significantly higher odds of  
24 having high BMI. A previous study reported WHtR was associated with visceral fat mass and  
25 cardiovascular risk factor clustering.<sup>41</sup> There are also significant correlations between  
26 determinants of obesity, including abdominal obesity indices (WHR and WC) and BMI, with  
27 abdominal obesity being the most frequent indicator of metabolic syndrome.<sup>41</sup> The close  
28 association between abdominal obesity and BMI suggests abdominal obesity should be  
29 closely monitored.

30 We found significant associations between high SBP/DBP and overweight/obesity in our  
31 participants. This was consistent with previous studies that demonstrated significant  
32 associations between obesity and hypertension or high BP ( $\geq 90$ th percentile) in children and  
33 adolescents.<sup>40</sup> Compared with adolescents with normal BMI, we found 7- and 2-fold  
34 increased risks for high SBP in obese girls and boys, respectively. The association between  
35 BMI and BP may be explained by various interacting complex systems.<sup>40</sup> Therefore, children  
36 with high BP may need intensive lifestyle management including daily physical activity and  
37 high fruit/vegetable diets.

1  
2  
3 In terms of lifestyle factors, we found that obese participants reported low physical  
4 activity and less consumption of fruits/vegetables compared with those with low/normal  
5 BMI. Other studies have also shown that low levels of physical activity and unhealthy dietary  
6 practices predicted obesity among adolescents.<sup>5</sup> Rapid urbanization and lifestyle changes in  
7 the UAE have increased exposure to fast/processed foods, along with reduced fruit/vegetable  
8 consumption and physical activity.<sup>3, 13, 17</sup> Therefore, promoting healthy lifestyles (e.g.,  
9 increased fruit/vegetable consumption and physical activity) among adolescents is a public  
10 health priority that may have significant impacts on health in adulthood. Addressing this issue  
11 should involve multiple approaches targeting behavior change (e.g., food labeling, planning  
12 “exercise friendly” cities).

## 26 **Conclusion**

28 Our study showed a high prevalence of overweight and obesity among school-aged  
29 adolescents in the UAE, which confirms that obesity remains a widespread problem in our  
30 schools. This study highlights that early screening of WHtR, WC, and BP are important in the  
31 routine assessment of adolescents, because abdominal obesity and high BP are important  
32 indicators of metabolic syndrome and cardiometabolic risk. It may also be necessary to  
33 promote healthier lifestyles (e.g., healthy eating and increased physical activity) among  
34 children and adolescents to help curb obesity trends and prevent development of chronic  
35 diseases. Additional studies are needed to observe the changes in obesity rates necessary to  
36 achieve the UAE Vision 2021 National Agenda of a world class healthcare system by  
37 reducing the prevalence of obesity among children to support a healthy population in our  
38 schools.

## **Acknowledgments**

Authors would like to thank the Ministry of Education for facilitating the data collection process. Also, we would like to thank all schools' personnel and students for their time and effort during the data collection process.

## **Contributors**

All authors wrote the proposal for the study. WBI, HR, AA, SE, conducted statistical analysis. WBI, HR, RF, ML wrote the initial draft of the manuscript. All authors contributed to writing the initial results and provided critical review of the manuscript.

## **Funding Statement**

This research was funded by the University of Sharjah/Sharjah Institute for Medical and Health Sciences Research/ Health Promotion Research Group (Grant number 150310).

## **Disclaimer**

The funding body was neither involved in the design of the study nor the collection, analysis, and interpretation of data and writing of the manuscript

## **Competing interests**

None declared.

## **Patient and public involvement**

Patients and/or the public were not involved in the design, or conduct, or reporting, or dissemination plans of this research

## **Patient consent for publication**

Not required.

## **Ethical Considerations**

Ethical approval to conduct this study was obtained from the Research Ethics Committee at the principal investigator's institution, the UAE Ministry of Health and Prevention, and the UAE Ministry of Education. Parental consent was obtained for each student that agreed to participate in this study

## **Data availability statement**

The datasets used and analysed during the current study are available from the corresponding author on reasonable request.

## REFERENCES

1. World Health Organization. Facts and figures on childhood obesity. Available at: <https://www.who.int/end-childhood-obesity/facts/en/>. Accessed August 8, 2019.
2. World Health Organization. Obesity and overweight (2018). Retrieved from <https://www.who.int/news-room/fact-sheets/detail/obesity-and-overweight>. Accessed August 8 2019.
3. Farrag NS, Cheskin LJ, Farag MK. A systematic review of childhood obesity in the Middle East and North Africa (MENA) region: Health impact and management. *Adv Pediatr Res*. 2017; 4:6.
4. AlBlooshi A, Shaban S, AlTunaiji M, Fares N, AlShehhi L, AlShehhi H, et al. Increasing obesity rates in school children in United Arab Emirates. *Obesity Science & Practice*. 2016;2(2):196-202.
5. Moonesar IA, Hickman CJL. How the UAE can reduce the prevalence of obesity among the youth? - A health policy perspective. *Advances in Obesity, Weight Management & Control*. 2017;6(2):64-68.
6. Barton M. Childhood obesity: a life-long health risk. *Acta Pharmacol Sin*. 2012;33(2):189-193.
7. Simmonds M, Llewellyn A, Owen CG, Woolacott N. Predicting adult obesity from childhood obesity: a systematic review and meta-analysis. *Obes Rev*. 2015;17(2):95-107.
8. Buscot MJ, Thomson RJ, Juonala M, Sabin MA, Burgner DP, Lehtimäki T, et al. BMI trajectories associated with resolution of elevated youth BMI and incident adult obesity. *Pediatr*. 2018;141(1):e20172003.



- 1  
2  
3 9. Al Amiri E, Abdullatif M, Abdulle A, Al Bitar N, Afandi EZ, Parish M, et al. The  
4 prevalence, risk factors, and screening measure for prediabetes and diabetes among  
5 Emirati overweight/obese children and adolescents. *BMC Public Health*. 2015;15:1298.  
6  
7
- 8  
9  
10 10. Global School-based Student Health Survey. United Arab Emirates 2016 Fact Sheet.  
11 Retrieved from [https://www.who.int/ncds/surveillance/gshs/UAE-2016-gshs-fact-](https://www.who.int/ncds/surveillance/gshs/UAE-2016-gshs-fact-sheet.pdf?ua=1)  
12 [sheet.pdf?ua=1](https://www.who.int/ncds/surveillance/gshs/UAE-2016-gshs-fact-sheet.pdf?ua=1). Accessed August 8, 2019.  
13  
14
- 15  
16  
17 11. Al Junaibi A, Abdulle A, Sabri S, Hag-Ali M, Nagelkerke N. The prevalence and  
18 potential determinants of obesity among school children and adolescents in Abu Dhabi,  
19 United Arab Emirates. *Int J Obes (Lond)*. 2013;37(1):68-74.  
20  
21
- 22  
23  
24 12. Bin Zaal AA, Musaiger AO, D'Souza R. Dietary habits associated with obesity among  
25 adolescents in Dubai, United Arab Emirates. *Nutr Hosp*. 2009;24(4):437-444.  
26  
27
- 28  
29  
30 13. Provenzano S, Santangelo OE, Catalano R, Marchese V, Bonanno V, La Placa S, et al.  
31 Determinants associated with obesity and physical activity in the public and private  
32 schools of the city of Palermo. *Acta Med Mediterr*. 2018;34(2):443-448.  
33  
34
- 35  
36  
37 14. Li J, Hooker NH. Childhood obesity and schools: Evidence from the National Survey of  
38 Children's Health. *J School Health*. 2010;80(2):96-103.  
39
- 40  
41  
42 15. Mansoori, Naveed, et al. "Prevalence of obesity and its risk factors among school children  
43 in Karachi, Pakistan." *Tropical doctor*. 2018; 48: 266-269.  
44
- 45  
46  
47 16. Kyallo F, Makokha A, Mwangi AM. Overweight and obesity among public and private  
48 primary school children in Nairobi, Kenya. *Health*. 2013;5(8):85.  
49
- 50  
51  
52 17. Sangwan D. A study of body mass index between private and government school  
53 children. *Int. j. phys. educ. sports health*. 2016;3(1):63-65.  
54
- 55  
56  
57 18. Shi J, Tan D, Xie H, Yang B, Liu R, Yu D, et al. Unequal distribution of overweight  
58 adolescents in immigrant-rich areas: Analysis of disparities among public and private  
59 school students in Shanghai, China. *Int J Environ Res Public Health*. 2017;14:252.  
60

- 1  
2  
3 19. Kowalski K, Crocker P, Donen R. The Physical Activity Questionnaire for Older  
4  
5 Children (PAQ-C) and Adolescents (PAQ-A) manual. Saskatoon, Canada: University of  
6  
7 Saskatchewan. 2004. Retrieved from  
8  
9 <https://www.researchgate.net/publication/228441462>. Accessed March 25, 2019.  
10  
11
- 12 20. Janz KF, Lutuchy EM, Wenthe P, Levy SM. Measuring activity in children and  
13  
14 adolescents using self-report: PAQ-C and PAQ-A. *Med Sci Sports Exerc.* 2008;40:767-  
15  
16 772.  
17
- 18 21. Platat C, Jarrar A. Reliability and validity of a physical activity questionnaire in children.  
19  
20 *International journal of food sciences and nutrition.* 2012 Sep 1;63(6):637-44.  
21  
22
- 23 22. Greene GW, Resnicow K, Thompson FE, Peterson KE, Hurley TG, Hebert JR et al.  
24  
25 Correspondence of the NCI Fruit and Vegetable Screener to repeat 24-H recalls and  
26  
27 serum carotenoids in behavioral intervention trials. *J Nutr.* 2008;138(1):200S-204S.  
28  
29
- 30 23. Thompson FE, Midthune D, Kahle L, Dodd KW. Development and evaluation of the  
31  
32 National Cancer Institute's dietary screener questionnaire scoring algorithms. *J Nutr.*  
33  
34 2017;147(6):1226-1233.  
35  
36
- 37 24. A.Alsunni AA, Badar A. Fruit and vegetable consumption and its determinants among  
38  
39 Saudi university students. *Journal of Taibah University Medical Sciences.*  
40  
41 2015;10(2):201-207.  
42  
43
- 44 25. World Health Organization. Waist circumference and waist-hip ratio: Report of a WHO  
45  
46 Expert Consultation Geneva, 8–11 December 2008. Retrieved from  
47  
48 [https://apps.who.int/iris/bitstream/handle/10665/44583/9789241501491\\_eng.pdf?sequenc](https://apps.who.int/iris/bitstream/handle/10665/44583/9789241501491_eng.pdf?sequence=1)  
49  
50 [e=1](https://apps.who.int/iris/bitstream/handle/10665/44583/9789241501491_eng.pdf?sequence=1). Accessed August 8 2019.  
51  
52
- 53 26. Ashwell M. Charts to assess the health risks of obesity. *Open Obes J.* 2011;3:78-84.  
54  
55  
56  
57  
58  
59  
60

- 1  
2  
3 27. de Onis M, Onyango AW, Borghi E, Siyam A, Nishida C, Siekmann J. Development of a  
4 WHO growth reference for school-aged children and adolescents. *Bull World Health Org.*  
5 2007;85(9):660-667.  
6  
7  
8  
9  
10 28. Kyle UG, Bosaeus I, De Lorenzo AD, Deurenberg P, Elia M, Gómez JM, et al.  
11 Bioelectrical impedance analysis --part I: review of principles and methods. *Clin Nutr.*  
12 2004;23(5):1226-1243.  
13  
14  
15  
16  
17 29. American Diabetes Association. 2. Classification and diagnosis of diabetes: standards of  
18 medical care in diabetes—2018. *Diabetes Care.* 2018;41(Supplement 1):S13-S27.  
19  
20  
21 30. Riley M, Bluhm B. High blood pressure in children and adolescents. *Am Fam Physician.*  
22 2012;85(7):693-700.  
23  
24  
25  
26 31. Al-Hazzaa HM, Al-Sobayel HI, Musaiger AO. Convergent validity of the Arab Teens  
27 Lifestyle Study (ATLS) physical activity questionnaire. *Int J Environ Res Public Health.*  
28 2011;8(9):3810-3820.  
29  
30  
31  
32  
33 32. El-Bayoumy I, Shady I, Lotfy H. Prevalence of obesity among adolescents (10 to 14  
34 years) in Kuwait. *Asia Pac J Public Health.* 2009;21(2):153-159.  
35  
36  
37  
38 33. El-Kassas G, Ziade F. Exploration of the risk factors of generalized and central obesity  
39 among adolescents in North Lebanon. *J Environ Public Health.* 2017. Retrieved from  
40 <https://www.ncbi.nlm.nih.gov/pubmed/29056975>. Accessed March 25 2019.  
41  
42  
43  
44 34. bolfotouh MA, Sallam SA, Mohammed MS, Loutfy AA, Hasab AA. Prevalence of  
45 elevated blood pressure and association with obesity in Egyptian school adolescents. *Int J*  
46 *Hypertens.* 2011;952537.  
47  
48  
49  
50  
51 35. Bibiloni M, Pons A, Tur JA. Prevalence of overweight and obesity in adolescents: a  
52 systematic review. *ISRN Obes.* 2013. Retrieved from [https://www.ncbi.nlm.nih.gov/](https://www.ncbi.nlm.nih.gov/pubmed/24555142)  
53 [pubmed/24555142](https://www.ncbi.nlm.nih.gov/pubmed/24555142). Accessed March 25, 2019.  
54  
55  
56  
57  
58  
59  
60

- 1  
2  
3 36. Galfo M, D'Addezio L, Censi L, Roccaldo R, Martone D. Overweight and obesity in  
4 Italian adolescents: Examined prevalence and socio-demographic factors. *Cent Eur J*  
5 *Public Health*. 2016;24(4):262-267.  
6  
7  
8  
9  
10 37. Krassas GE, Tzotzas T, Tsametis C, Konstantinidis T. Prevalence and trends in  
11 overweight and obesity among children and adolescents in Thessaloniki, Greece. *J*  
12 *Pediatr Endocrinol Metab*. 2001;14:1319-1326.  
13  
14  
15  
16  
17 38. Makansi N, Allison P, Awad M, Bedos C. Fruit and vegetable intake among Emirati  
18 adolescents: a mixed methods study. *East Mediterr Health J*. 2018;24(7):653-663.  
19  
20  
21 39. World Health Organization. Global recommendations on physical activity for health.  
22 (2010). joint WHO/FAO Expert Consultation. Diet, Nutrition and the Prevention of  
23 Chronic Diseases. WHO Technical Report Series. Retrieved from [https://](https://apps.who.int/iris/bitstream/handle/10665/42665/WHO_TRS_916.pdf?sequence=1)  
24 [apps.who.int/iris/bitstream/handle/10665/42665/WHO\\_TRS\\_916.pdf?sequence=1](https://apps.who.int/iris/bitstream/handle/10665/42665/WHO_TRS_916.pdf?sequence=1).  
25  
26  
27  
28  
29  
30  
31 Accessed March 25 2019.  
32  
33 40. Dulskiene V, Kuciene R, Medzioniene J, Benetis R. Association between obesity and  
34 high blood pressure among Lithuanian adolescents: a cross-sectional study. *Ital J Pediatr*.  
35 2014;40(1):102.  
36  
37  
38  
39  
40  
41  
42  
43  
44  
45  
46  
47  
48  
49  
50  
51  
52  
53  
54  
55  
56  
57  
58  
59  
60

1  
2  
3  
4  
5  
6  
7  
8  
9  
10  
11  
12  
13  
14  
15  
16  
17  
18  
19  
20  
21  
22  
23  
24  
25  
26  
27  
28  
29  
30  
31  
32  
33  
34  
35  
36  
37  
38  
39  
40  
41  
42  
43  
44  
45  
46  
47  
48  
49  
50  
51  
52  
53  
54  
55  
56  
57  
58  
59  
60



Figure 1: Flow diagram of data collection and analysis

279x215mm (300 x 300 DPI)

STROBE Statement—Checklist of items that should be included in reports of *cross-sectional studies*  
**Prevalence and determinants of overweight/obesity among school-aged adolescents in the**  
**United Arab Emirates**

|                              | Item No | Recommendation                                                                                                                                                                       | Page No                 |
|------------------------------|---------|--------------------------------------------------------------------------------------------------------------------------------------------------------------------------------------|-------------------------|
| <b>Title and abstract</b>    | 1       | (a) Indicate the study's design with a commonly used term in the title or the abstract                                                                                               | 1                       |
|                              |         | (b) Provide in the abstract an informative and balanced summary of what was done and what was found                                                                                  | 1                       |
| <b>Introduction</b>          |         |                                                                                                                                                                                      |                         |
| Background/rationale         | 2       | Explain the scientific background and rationale for the investigation being reported                                                                                                 | 2-5                     |
| Objectives                   | 3       | State specific objectives, including any prespecified hypotheses                                                                                                                     | 4                       |
| <b>Methods</b>               |         |                                                                                                                                                                                      |                         |
| Study design                 | 4       | Present key elements of study design early in the paper                                                                                                                              | 5-8                     |
| Setting                      | 5       | Describe the setting, locations, and relevant dates, including periods of recruitment, exposure, follow-up, and data collection                                                      | 5                       |
| Participants                 | 6       | (a) Give the eligibility criteria, and the sources and methods of selection of participants                                                                                          | 5                       |
| Variables                    | 7       | Clearly define all outcomes, exposures, predictors, potential confounders, and effect modifiers. Give diagnostic criteria, if applicable                                             | 8                       |
| Data sources/<br>measurement | 8*      | For each variable of interest, give sources of data and details of methods of assessment (measurement). Describe comparability of assessment methods if there is more than one group | 6-7                     |
| Bias                         | 9       | Describe any efforts to address potential sources of bias                                                                                                                            | 13 under limitation     |
| Study size                   | 10      | Explain how the study size was arrived at                                                                                                                                            | 5<br>Under participants |
| Quantitative variables       | 11      | Explain how quantitative variables were handled in the analyses. If applicable, describe which groupings were chosen and why                                                         | 5-9                     |
| Statistical methods          | 12      | (a) Describe all statistical methods, including those used to control for confounding                                                                                                | 8                       |
|                              |         | (b) Describe any methods used to examine subgroups and interactions                                                                                                                  |                         |
|                              |         | (c) Explain how missing data were addressed                                                                                                                                          |                         |
|                              |         | (d) If applicable, describe analytical methods taking account of sampling strategy                                                                                                   | 8                       |
|                              |         | (e) Describe any sensitivity analyses                                                                                                                                                |                         |

| <b>Results</b>           |     |                                                                                                                                                                                                              |                             |
|--------------------------|-----|--------------------------------------------------------------------------------------------------------------------------------------------------------------------------------------------------------------|-----------------------------|
| Participants             | 13* | (a) Report numbers of individuals at each stage of study—eg numbers potentially eligible, examined for eligibility, confirmed eligible, included in the study, completing follow-up, and analysed            | 8                           |
|                          |     | (b) Give reasons for non-participation at each stage                                                                                                                                                         | 8                           |
|                          |     | (c) Consider use of a flow diagram                                                                                                                                                                           | Attached as a separate file |
| Descriptive data         | 14* | (a) Give characteristics of study participants (eg demographic, clinical, social) and information on exposures and potential confounders                                                                     | 8-9                         |
|                          |     | (b) Indicate number of participants with missing data for each variable of interest                                                                                                                          |                             |
| Outcome data             | 15* | Report numbers of outcome events or summary measures                                                                                                                                                         | 9-10                        |
| Main results             | 16  | (a) Give unadjusted estimates and, if applicable, confounder-adjusted estimates and their precision (eg, 95% confidence interval). Make clear which confounders were adjusted for and why they were included | 9-10                        |
|                          |     | (b) Report category boundaries when continuous variables were categorized                                                                                                                                    | 9-10                        |
|                          |     | (c) If relevant, consider translating estimates of relative risk into absolute risk for a meaningful time period                                                                                             | 9-10                        |
| Other analyses           | 17  | Report other analyses done—eg analyses of subgroups and interactions, and sensitivity analyses                                                                                                               |                             |
| <b>Discussion</b>        |     |                                                                                                                                                                                                              |                             |
| Key results              | 18  | Summarise key results with reference to study objectives                                                                                                                                                     | 10                          |
| Limitations              | 19  | Discuss limitations of the study, taking into account sources of potential bias or imprecision. Discuss both direction and magnitude of any potential bias                                                   | 13                          |
| Interpretation           | 20  | Give a cautious overall interpretation of results considering objectives, limitations, multiplicity of analyses, results from similar studies, and other relevant evidence                                   | 13                          |
| Generalisability         | 21  | Discuss the generalisability (external validity) of the study results                                                                                                                                        |                             |
| <b>Other information</b> |     |                                                                                                                                                                                                              |                             |
| Funding                  | 22  | Give the source of funding and the role of the funders for the present study and, if applicable, for the original study on which the present article is based                                                | In the title page           |

\*Give information separately for exposed and unexposed groups.

**Note:** An Explanation and Elaboration article discusses each checklist item and gives methodological background and published examples of transparent reporting. The STROBE checklist is best used in conjunction with this article (freely available on the Web sites of PLoS Medicine at <http://www.plosmedicine.org/>, Annals of Internal Medicine at <http://www.annals.org/>, and Epidemiology at <http://www.epidem.com/>). Information on the STROBE Initiative is available at [www.strobe-statement.org](http://www.strobe-statement.org).

# BMJ Open

## Prevalence and determinants of overweight/obesity among school-aged adolescents in the United Arab Emirates: A cross-sectional study of private and public schools

|                                 |                                                                                                                                                                                                                                                                                                                                                                                                                                                                                                                                                                                                                                                                                                                                                                                                                                                                                                                                                                                                                                                                                                                                                                                              |
|---------------------------------|----------------------------------------------------------------------------------------------------------------------------------------------------------------------------------------------------------------------------------------------------------------------------------------------------------------------------------------------------------------------------------------------------------------------------------------------------------------------------------------------------------------------------------------------------------------------------------------------------------------------------------------------------------------------------------------------------------------------------------------------------------------------------------------------------------------------------------------------------------------------------------------------------------------------------------------------------------------------------------------------------------------------------------------------------------------------------------------------------------------------------------------------------------------------------------------------|
| Journal:                        | <i>BMJ Open</i>                                                                                                                                                                                                                                                                                                                                                                                                                                                                                                                                                                                                                                                                                                                                                                                                                                                                                                                                                                                                                                                                                                                                                                              |
| Manuscript ID                   | bmjopen-2020-038667.R1                                                                                                                                                                                                                                                                                                                                                                                                                                                                                                                                                                                                                                                                                                                                                                                                                                                                                                                                                                                                                                                                                                                                                                       |
| Article Type:                   | Original research                                                                                                                                                                                                                                                                                                                                                                                                                                                                                                                                                                                                                                                                                                                                                                                                                                                                                                                                                                                                                                                                                                                                                                            |
| Date Submitted by the Author:   | 18-Aug-2020                                                                                                                                                                                                                                                                                                                                                                                                                                                                                                                                                                                                                                                                                                                                                                                                                                                                                                                                                                                                                                                                                                                                                                                  |
| Complete List of Authors:       | baniissa, wegdan; University of Sharjah, Radwan, Hadia; University of Sharjah, Research Institute for Medical and Health Sciences, Clinical dietetics and nutrition<br>Rossiter, Rachel; Charles Sturt University<br>Fakhry, Randa; Research Institute for Medical and Health Sciences, College of Health Sciences, Department of Nursing, University of Sharjah, Sharjah, UAE<br>Al-Yateem, Nabeel ; Research Institute for Medical and Health Sciences, College of Health Sciences, Department of Nursing, University of Sharjah, Sharjah, UAE<br>Al shujairi, Arwa; 9Research Institute for Medical and Health Sciences, University of Sharjah<br>Enayah, Sana; Ajman University, 7Department of Clinical Sciences, College of Pharmacy and Health Sciences<br>Macridis, soultana; University of Alberta, Centre for Active Living Faculty of Kinesiology, Sport, and Recreation<br>Farghaly, Abeer; Cairo University Kasr Alainy Faculty of Medicine, Department of cardiology and geriatric physical therapy, Faculty of physiotherepay<br>Awad, M. A.; Research Institute for Medical and Health Sciences, College of Dental Medicine-Department of Preventive & Restorative Dentistry |
| <b>Primary Subject Heading</b>: | Nutrition and metabolism                                                                                                                                                                                                                                                                                                                                                                                                                                                                                                                                                                                                                                                                                                                                                                                                                                                                                                                                                                                                                                                                                                                                                                     |
| Secondary Subject Heading:      | Public health, Epidemiology, Nursing                                                                                                                                                                                                                                                                                                                                                                                                                                                                                                                                                                                                                                                                                                                                                                                                                                                                                                                                                                                                                                                                                                                                                         |
| Keywords:                       | Nutrition < TROPICAL MEDICINE, PUBLIC HEALTH, NUTRITION & DIETETICS                                                                                                                                                                                                                                                                                                                                                                                                                                                                                                                                                                                                                                                                                                                                                                                                                                                                                                                                                                                                                                                                                                                          |
|                                 |                                                                                                                                                                                                                                                                                                                                                                                                                                                                                                                                                                                                                                                                                                                                                                                                                                                                                                                                                                                                                                                                                                                                                                                              |

SCHOLARONE™  
Manuscripts





I, the Submitting Author has the right to grant and does grant on behalf of all authors of the Work (as defined in the below author licence), an exclusive licence and/or a non-exclusive licence for contributions from authors who are: i) UK Crown employees; ii) where BMJ has agreed a CC-BY licence shall apply, and/or iii) in accordance with the terms applicable for US Federal Government officers or employees acting as part of their official duties; on a worldwide, perpetual, irrevocable, royalty-free basis to BMJ Publishing Group Ltd ("BMJ") its licensees and where the relevant Journal is co-owned by BMJ to the co-owners of the Journal, to publish the Work in this journal and any other BMJ products and to exploit all rights, as set out in our [licence](#).

The Submitting Author accepts and understands that any supply made under these terms is made by BMJ to the Submitting Author unless you are acting as an employee on behalf of your employer or a postgraduate student of an affiliated institution which is paying any applicable article publishing charge ("APC") for Open Access articles. Where the Submitting Author wishes to make the Work available on an Open Access basis (and intends to pay the relevant APC), the terms of reuse of such Open Access shall be governed by a Creative Commons licence – details of these licences and which [Creative Commons](#) licence will apply to this Work are set out in our licence referred to above.

Other than as permitted in any relevant BMJ Author's Self Archiving Policies, I confirm this Work has not been accepted for publication elsewhere, is not being considered for publication elsewhere and does not duplicate material already published. I confirm all authors consent to publication of this Work and authorise the granting of this licence.

1  
2  
3 **Prevalence and determinants of overweight/obesity among school-aged adolescents in the**  
4 **United Arab Emirates: A cross sectional study of private and public schools**  
5

6  
7 \*Wegdan Bani Issa<sup>1</sup>, PhD, Associate Professor  
8

9 Hadia Radwan<sup>2</sup>, PhD, Assistant Professor  
10

11 Rachel Rossiter<sup>3</sup>, HScD, Associate Professor  
12

13 Randa Fakhry<sup>1</sup>, Lecturer  
14

15 Nabeel Al Yateem<sup>1</sup>, PhD, Associate Professor  
16

17 Arwa Al-Shujairi<sup>4</sup>, MPH, Research Assistant  
18

19 Sana Enayah<sup>5</sup>, PharmD, PhD, Associate Professor  
20

21 Soultana Macridis<sup>6</sup>, PhD, Research Associate  
22

23 Abeer Farghaly<sup>7</sup>, Cairo University, Egypt  
24

25 Manal Awad<sup>8</sup>, PhD, Professor  
26  
27  
28  
29

30  
31 <sup>1</sup>Research Institute for Medical and Health Sciences, College of Health Sciences, Department of  
32 Nursing, University of Sharjah, Sharjah, UAE

33 <sup>2</sup>Research Institute for Medical and Health Sciences, College of Health Science-Department of  
34 Clinical Nutrition and Dietetics, University of Sharjah-UAE

35 <sup>3</sup> Charles Sturt University, Australia  
36

37 <sup>4</sup>Research Institute for Medical and Health Sciences, University of Sharjah, UAE  
38

39 <sup>5</sup>Department of Clinical Sciences, College of Pharmacy and Health Sciences, Ajman University,  
40 Ajman, UAE

41 <sup>6</sup>Centre for Active Living-Faculty of Kinesiology, Sport, and Recreation, Canada University of  
42 Alberta, Alberta, Canada

43 <sup>7</sup>University of Cairo, Faculty of physical Therapy, Egypt  
44

45 <sup>8</sup>Research Institute for Medical and Health Sciences, College of Dental Medicine-Department of  
46 Preventive & Restorative Dentistry, University of Sharjah- UAE  
47  
48

49 **\*Corresponding author:**

50 Wegdan Bani Issa, PhD, MSN, RN

51 Associate Professor

52 College of Health Sciences

53 University of Sharjah

54 P.O. Box 27272 Sharjah

55 United Arab Emirates

56 Phone: +971-65057522. Email: [wbaniissa@sharjah.ac.ae](mailto:wbaniissa@sharjah.ac.ae)

57 **Word count: 5596**  
58  
59  
60

**ABSTRACT**

**Objectives** The United Arab Emirates (UAE) identified childhood obesity as a target for public health action. This study investigated the prevalence of obesity and factors influencing obesity among adolescents in the UAE.

**Design** Cross-sectional study.

**Settings** Private and public secondary schools.

**Participants** Adolescents aged 13–19 years (N = 932) selected through cluster sampling; 434 (46.6%) from private schools and 498 (53.4%) from public schools.

**Measures** Self-report questionnaires were used to collect data on adolescents' sociodemographic factors, fruit/vegetable (F/V) intake, and physical activity. Participants' weight, height, waist circumference (WC), hip circumference (HC), and body fat percentage (%BF) were measured, and waist to height ratio (WHtR), waist to hip ratio (WHR), and body mass index (BMI) were calculated. Overweight/obesity was determined by BMI (BMI  $\geq$ 85th percentile for age), abdominal obesity (AO) (measured by WC, WHtR, and WHR) and %BF. Multiple logistic regression analyses were conducted to determine the predictors of obesity.

**Results** In total, 34.7% of participants were overweight/obese (BMI  $\geq$ 85th percentile) and 378 (40.6%) had high %BF. AO was noted in 47.3%, 22.7%, and 27.1% of participants as evaluated by WC, WHR, and WHtR, respectively. Significantly more participants from public schools were overweight/obese (BMI  $\geq$ 85th percentile) compared with their private school counterparts (37.8% vs. 31.1%). Similarly, significantly more participants from public schools had AO (WC, WHR, WHtR) than those from private schools. F/V intake and physical activity were the strongest predictors of obesity in participants: BMI (odds ratios [ORs] = 1.88 and 2.21, respectively), AO (WC: ORs = 1.54 and 1.78, respectively; WHtR: ORs = 1.35 and 1.64, respectively), and %BF (ORs = 2.43 and 1.46, respectively).

1  
2  
3 **Conclusions** This study highlights the need for nutritional and physical activity interventions,  
4 with sustained strategies to fight obesity in adolescents. In addition to BMI, AO must be  
5 considered when estimating obesity in adolescents.  
6  
7  
8  
9

10 **Keywords:** Adolescents, obesity, body mass index, abdominal obesity, body fat percentage,  
11 public schools, private schools, fruit and vegetable intake, physical activity.  
12  
13  
14  
15  
16  
17  
18  
19  
20  
21  
22  
23  
24  
25  
26  
27  
28  
29  
30  
31  
32  
33  
34  
35  
36  
37  
38  
39  
40  
41  
42  
43  
44  
45  
46  
47  
48  
49  
50  
51  
52  
53  
54  
55  
56  
57  
58  
59  
60

For peer review only

### Strengths and limitations of this study

- This study was among the first in UAE to assess obesity using different obesity indices (BMI, abdominal obesity, and body fat percentage) and examine its determinants using a representative sample of adolescents from private and public schools.
- This study identified two important factors impacting obesity in adolescents including fruit and vegetable consumption and physical activities that can inform the direction of public health policy.
- This study used a cross-sectional design and causality cannot be assumed.
- Future studies should include more male participants and more participants from private schools to provide a better estimate of obesity in the UAE adolescent population.
- Future research should investigate ethnic-specific cutoff values and criteria to define obesity in adolescent populations.

review only

## INTRODUCTION

Adolescence is a transitional developmental period characterized by changes in physical, intellectual, social, and emotional health. Optimal growth during adolescence is important for maintaining good health throughout the life course. Obesity among adolescents is a serious health problem and public health issue that demands urgent attention.<sup>1</sup> Globally, the prevalence of overweight/obesity has increased among children and adolescents. For example, the global prevalence was 4% in 1975, whereas the 2016 estimate was over 18%; this increase was similar among boys and girls (19% and 18%, respectively).<sup>2</sup> Increasing overweight and obesity rates are important public health issues for Middle Eastern and North African countries, especially as rapid increases in obesity have been observed among children and adolescents.<sup>3</sup> A large-scale epidemiological study (n=44,942) conducted in Ras Al Khaimah, United Arab Emirates (UAE), confirmed obesity was steadily increasing in those aged 3–18 years; each year an additional 2.36% were classified as obese and 0.28% as extremely obese.<sup>4</sup> In 2014, a global action plan that aimed to prevent and control noncommunicable diseases was adopted by the World Health Assembly.<sup>1</sup> This action plan highlighted the importance of measures to address obesity rates globally, including among children and adolescents. Many countries have reflected the need to focus on reducing and preventing obesity among young people in national policies and strategies; for example, the UAE included obesity among children as an indicator in the Vision 2021 National Agenda.<sup>5</sup>

In addition to causing health problems in childhood and adolescence, overweight and obesity among young people can have long-term health impacts into adulthood (e.g., cardiovascular disease, insulin resistance, type 2 diabetes mellitus, psychosocial complications).<sup>6</sup> Childhood obesity can also predict obesity in adulthood. A long-term follow-up study indicated efforts to influence body mass index (BMI) over the life course should begin early (e.g., before age 6 years), and noted the progression toward a high BMI begins in adolescence for boys and young adulthood for girls.<sup>7 8</sup> These studies highlighted that early intervention is important to prevent increased BMI and associated health risks, which also contribute to increased healthcare expenditure.<sup>7 8</sup>

Various external factors that influence obesity have changed in recent years, such as rapid changes in dietary practices (e.g., fast food, processed foods), extensive use of technology (e.g., the

1  
2  
3 Internet and mobile devices), and increasingly sedentary lifestyles. Such developments have been  
4 associated with high obesity rates among adolescents, especially in developing countries.<sup>9</sup> In  
5 particular, the rapid socioeconomic transition in Middle Eastern and North African countries has  
6 resulted in increased urbanization and drastic lifestyle changes, manifested in low physical activity  
7 and unhealthy dietary practices.<sup>3</sup> These factors combined with the growing fast food industry have led  
8 to various nutritional-related chronic conditions among adolescents, including obesity.<sup>9</sup>

9  
10  
11  
12  
13  
14  
15  
16 The UAE has also witnessed rapid economic development and corresponding changes in  
17 lifestyles, leading to a marked increase in obesity in children/adolescents. Recently, the Global  
18 School-based Student Health Survey reported the obesity prevalence in the UAE youth population  
19 (aged 13–15 years) was 16.2%.<sup>10</sup> Previous cross-sectional studies from different cities across the UAE  
20 have also shown increased rates of obesity in adolescents, with the reported prevalence ranging from  
21 18.9% in Abu Dhabi<sup>11</sup> to 35% in Dubai.<sup>12</sup>

22  
23  
24  
25  
26  
27  
28  
29 Given the increased prevalence of obesity, it is important to clarify factors that contribute to  
30 obesity. School type (e.g., public, private) may be a key determinant of obesity, as students spend  
31 much of their day in school. Previous studies investigated differences in obesity rates between public  
32 and private schools. For example, one study found that many students attending public schools were  
33 obese and had low physical activity, low fruits and vegetables (F/V) consumption, and low intakes of  
34 water, fiber, vitamins, and minerals.<sup>13</sup> Another study found that children attending public schools had  
35 a high BMI and a greater likelihood of being overweight compared with children attending private  
36 schools.<sup>14</sup> However, other studies have reported opposite trends. Studies conducted in different  
37 countries such as Pakistan, Kenya, and India, all reported private school students had higher rates of  
38 obesity compared with those attending public schools.<sup>15–17</sup> Another study conducted in Shanghai also  
39 reported more students at private schools were overweight compared with those at public schools.<sup>18</sup>  
40 That study noted that this difference may be explained by diet, socioeconomic status, school  
41 environment, and factors related to infancy.

42  
43  
44  
45  
46  
47  
48  
49  
50  
51  
52  
53  
54  
55  
56  
57  
58  
59  
60  
61 Most previous studies that investigated the prevalence of obesity in the UAE did not consider  
62 school type and other potentially associated factors. The majority of available studies<sup>4 11 12</sup> only used  
63 BMI as indicator of obesity in school-aged adolescents and did not include other parameters such as

1  
2  
3 abdominal obesity (AO) indicators and body fat percentage (%BF). Relying on BMI only does not  
4 provide a realistic and comprehensive picture of obesity in adolescents.<sup>1 2</sup> By mapping and rigorously  
5 assessing adolescents' obesity-related health status, healthcare providers, policymakers, schools, and  
6 families will be able to collaborate to develop appropriate evidence-based approaches to promote  
7 adolescent health.  
8  
9  
10  
11  
12

13  
14 This study explored the epidemiology of overweight and obesity in the adolescent population and  
15 compared obesity figures between private and public schools. We also aimed to determine factors that  
16 contributed to overweight and obesity in participants, using BMI, AO, and %BF indicators. Factors  
17 measured included sociodemographic data for age, gender, nationality, parents' level of education,  
18 employment (employed/unemployed), self-reported income (below average/average/above average),  
19 school type (public vs. private), and lifestyle factors (F/V intake, physical activity levels).  
20  
21  
22  
23  
24  
25

## 26 **SUBJECTS AND METHODS**

### 27 **Study design and setting**

28  
29 We adopted a quantitative correlational design. The sample was drawn from intermediate and high  
30 schools (secondary education) that were randomly selected from lists obtained from the Ministry of  
31 Education and other private/public school governing bodies in the UAE's seven emirates (Sharjah,  
32 Dubai, Abu Dhabi, Ajman, Ras Al Khaimah, Fujairah, and Umm Al Quwain). Recent statistics from  
33 the Ministry of Education (2018)<sup>19</sup> showed the UAE has fewer public schools than private schools  
34 (619 public vs. 643 private schools). Similarly, in terms of secondary schools (study population), the  
35 UAE has more private (N = 257) than public schools (128).<sup>19</sup> This study was reported according to the  
36 STROBE checklist for reports of cross-sectional studies (see Supplementary File 1).  
37  
38  
39  
40  
41  
42  
43  
44  
45  
46

### 47 **Participants and sampling**

48  
49 This study used one-stage cluster sampling of private and public schools. To obtain a representative  
50 sample, a simple random sampling technique was used to select 10 schools from the public cluster and  
51 15 schools from the private cluster. Cluster sampling is cost effective and recommended when it is  
52 difficult to compile a sampling frame that includes all elements of the study population.<sup>20</sup>  
53  
54  
55  
56  
57

58 A convenience sample of classes from grades 9–12 was chosen by the principals of the selected  
59 schools based on students' availability. All students in those classes were invited to participate in this  
60



1  
2  
3 study. Convenience sampling was justifiable in our situation as it increased the cooperation of school  
4 principals and staff in data collection. The principal of each school provided access to classes  
5 depending on the class schedules, students' availability, and willingness of school personnel to  
6 facilitate data collection. Furthermore, selected schools requested that data collection procedures did  
7 not interrupt the planned educational activities which were set at the beginning of the academic year  
8 (e.g., exams' schedules, physical activity classes, and other extra-curricular activities).  
9

10  
11  
12  
13  
14  
15  
16 The sample included male and female students from grades 9–12 in private and public  
17 schools (aged 13–19 years) of any nationality whose parents provided consent for them to participate.  
18 We excluded students with chronic diseases (e.g., type 2 diabetes, cancer, and mental health  
19 conditions) based on information from students' school records. This was because management of  
20 chronic diseases requires following special lifestyles and dietary practices that may affect the study's  
21 anthropometric measurements (Figure 1: Flow diagram of data collection process and analysis).  
22  
23  
24  
25  
26  
27

28  
29 We used a standard sample size estimation method to obtain the sample size for a proportion  
30 data.<sup>21</sup> Based on an overweight/obesity prevalence of 40% among UAE adolescents,<sup>4</sup> a 3% margin of  
31 error, 95% confidence interval (CI), and a significance level of 0.05 (two tailed),<sup>21</sup> a total of 1024  
32 participants was needed. The 40% obesity prevalence rate used for this calculation was based on  
33 recent evidence of an increased prevalence of obesity in adolescents and rates reported in similar  
34 studies that included large populations of UAE school-aged adolescents from all nationalities, which  
35 was similar to our population.<sup>4 11 12</sup> An additional 100 participants were included to allow for non-  
36 responses and control for the design effect associated with cluster sampling, where less precise  
37 information is anticipated because people in a cluster tend to be more alike.<sup>20</sup> The larger sample size  
38 also increased precision during multiple comparisons in the statistical analyses and aided in  
39 controlling for possible confounding variables.<sup>21</sup>  
40  
41  
42  
43  
44  
45  
46  
47  
48  
49  
50

### 51 **Data collection**

52  
53  
54 Figure 1 presents a flowchart of the data collection process. Participating students completed a self-  
55 report questionnaire that included questions about sociodemographic characteristics, F/V intake, and  
56 physical activity. This was followed by collection of anthropometric measurements. Trained research  
57  
58  
59  
60

1  
2  
3 assistants administered the questionnaire in the selected classrooms. Participating students were then  
4  
5 directed to the on-site school clinic where anthropometric measurements were taken by the research  
6  
7 team using standardized techniques. The same research team administered the questionnaire and took  
8  
9 the anthropometric measurements to maintain consistency and uniformity in the data collection  
10  
11 process across different sites. Data were collected from September 2018 to May 2019, which was a  
12  
13 regular school period excluding the summer holiday. In the UAE, there are no large seasonal  
14  
15 variations during this part of the year and the temperature falls within an acceptable range; therefore,  
16  
17 we anticipated no seasonal differences in anthropometric measurements.  
18  
19

## 20 **Measurements**

21  
22 The self-reported questionnaire included sociodemographic data (age, gender, nationality, and type of  
23  
24 school (private vs. public), parents' level of education, employment (employed/unemployed), and  
25  
26 self-reported income (below average/average/above average).  
27  
28

## 29 ***Physical activity***

30  
31 Participants' physical activity was recorded using the Physical Activity Questionnaire for Adolescents  
32  
33 (PAQ-A). This tool is a 7-day recall self-report questionnaire with nine-items.<sup>22</sup> The PAQ-A was  
34  
35 originally developed to evaluate physical activity levels among high school students (aged 14–19  
36  
37 years). Responses are on a 5-point Likert-scale, and the nine items are summed to give a total physical  
38  
39 activity score. A high mean score indicates a high level of physical activity, and a cutoff score <2.75  
40  
41 is considered inactive. The English version of the PAQ-A has high reliability (Cronbach's alpha:  
42  
43 0.77–0.88) and high concurrent validity.<sup>23</sup> The Arabic version of the scale demonstrated good  
44  
45 reliability and validity parameters when used in Arabic children and adolescents.<sup>24</sup> The estimated  
46  
47 completion time for the PAQ-A is 20 minutes.<sup>23</sup>  
48  
49

## 50 ***F/V intake***

51  
52 F/V intake was assessed using the National Cancer Institute (NCI) Fruit and Vegetable Screener.<sup>25</sup>  
53  
54 This instrument covers the frequency/amount consumed of specific items. These include: 100% fruit  
55  
56 juice, fruit (e.g., fresh, canned, frozen), fried potatoes (e.g., French fries), other potatoes, dried beans,  
57  
58 other vegetables, and tomato-based sauces (e.g., pasta, pizza). The instrument also evaluates the  
59  
60 frequency of consumption of vegetable combinations (e.g., sandwiches, salads, casseroles/stews, stir-

1  
2  
3 fries). We calculated servings per day using NCI standard scoring algorithms.<sup>26</sup> The English version  
4 of the NCI has been reported to have excellent reliability and validity in both adults and adolescents.<sup>27</sup>  
5  
6 The scale also had acceptable reliability (Cronbach's alpha: 0.82) and predictive validity among Saudi  
7 young adults.<sup>27</sup> A F/V intake of <5 servings was considered a low intake.  
8  
9

### 10 ***Obesity-related anthropometric measurements and indices***

11  
12 Anthropometric indices included height (cm), weight (kg), waist and hip circumferences (WC and  
13 HC, respectively), waist to hip ratio (WHR), waist to height ratio (WHtR), and %BF. For these  
14 measurements, students removed their shoes and wore minimal light-weight clothing as per World  
15 Health Organization (WHO) guidelines.<sup>28</sup> Participants' height (to the nearest 0.1 cm) and weight (to  
16 the nearest 0.1 kg) were measured using a telescopic measuring rod (Seca 220) for column scales.  
17  
18 Two measurements for WC and HC were recorded for each participant using an inextensible  
19 anthropometric tape (Seca 201). These measurements were taken while participants stood erect with  
20 their arms by their sides and feet close together.  
21  
22  
23  
24  
25  
26  
27  
28  
29

30  
31 Abdominal obesity (AO) indices included: WC, WHtR, and WHR. For WC, a cutoff of above the  
32 90th percentile for age indicated AO.<sup>28</sup> Participants' WHtR was calculated by dividing their WC by  
33 height, and a cutoff value of 0.5 was used to define AO.<sup>28 29</sup> WHR was calculated by dividing the WC  
34 by HC (WHO, 2008), with a cutoff of value of 0.85 used to define AO.<sup>28</sup> BMI (weight in kg divided  
35 by height in m<sup>2</sup>) was calculated and classified according to WHO criteria: underweight = BMI <3rd  
36 percentile; normal weight = BMI between the 3rd and 85th percentiles; overweight = BMI between  
37 the 85th and 97th percentiles; and obesity = BMI >97th percentile.<sup>30</sup>  
38  
39  
40  
41  
42  
43  
44

45  
46 A BMI at or above the 85th percentile for adolescents was adopted to classify participants as  
47 either overweight/obese or underweight/normal, as this was widely used in similar epidemiological  
48 studies<sup>4 11 12</sup> and recommended by international organizations (e.g., WHO, Centers for Disease  
49 Control, and International Obesity Taskforce) to define obesity.<sup>30 31 32</sup> However, because there are  
50 clinical limitations in using BMI to estimate obesity in adolescent populations and the lack of a gold  
51 standard to define obesity,<sup>33</sup> we also reported other obesity indices including AO indicators (WC,  
52 WHtR, WHR) and %BF. This combination was critical to provide valid and reliable obesity estimates  
53 in our adolescent population.  
54  
55  
56  
57  
58  
59  
60

1  
2  
3 Participants' %BF was measured using the Body Composition Analyzer (TANITA MC 780  
4 multi-frequency segmental body composition analyzer). This device measured participants' body  
5 composition parameters by evaluating differences in impedance of body components (e.g., muscle and  
6 lean tissue).<sup>34</sup> Various body composition parameters are automatically calculated, including total body  
7 muscle and fat mass, total body water, total body fat and water ratios, muscle mass of the arms/legs,  
8 BMI, and basal metabolic rate. This technology has been shown to be valid and reliable.<sup>34 35</sup>  
9 Standardized %BF cutoff ratios were used with 25% for boys and 30% for girls.<sup>36</sup>

### 18 **Data analysis**

19  
20 Data were analyzed using SAS version 9.4. Descriptive characteristics were presented using  
21 frequency, percentage, mean, and standard deviation. Next, we compared differences in categorical  
22 sociodemographic variables by school type (private vs. public) using chi-square tests.  
23  
24

25  
26 Simple and multiple logistic regression analyses were conducted to assess the associations  
27 between sociodemographic variables, school type, physical activity, and F/V intake, and all obesity  
28 indicators (BMI, AO, and %BF). Variables with a p-value  $\leq 0.20$  in the simple regression analysis  
29 were included in the multivariate regression model (gender, nationality, school type, F/V intake, and  
30 physical activity). Results of the logistic regression models were expressed as odds ratios (ORs) with  
31 95% CIs. P-values less than 0.05 were considered statistically significant.  
32  
33  
34  
35  
36  
37  
38

### 39 **Ethics**

40  
41 Ethical approval to conduct this study was obtained from the University of Sharjah/Research Ethics  
42 Committee (REC/15/12/10) and the UAE Ministry of Health and Prevention (MOHAP REC-11).  
43  
44 Parental consent was obtained for each student that agreed to participate.  
45  
46

## 47 **RESULTS**

### 48 **Participants' characteristics and obesity-related indices**

49  
50 Table 1 presents participants' characteristics. Of the 1124 adolescents who were recruited and met the  
51 inclusion criteria, complete data were available for 932 participants (82.9% response rate). Missing  
52 and incomplete data were eliminated from the analyses.  
53  
54  
55  
56  
57  
58  
59  
60

The most common reason for not participating was lack of interest in this study. Of the participating adolescents, 434 (46.6%) attended private schools and 498 (53.4%) attended public schools. Participants' average age was 15.8±1.43 years; 311 (33.4%) were males and 621 (66.6%) were females. The majority of the participants were UAE nationals (61.1%). More than two-thirds of participants' mothers were not employed (n=682, 73.2%) and the majority (60%) had an average family income (based on participants' self-report). Participants' mean F/V intake score was 3.1±1.83, with 87.4% having <5 F/V servings. The mean physical activity score was 2.3±0.71; 79.7% of participants were classified as inactive.

The prevalence rate of overweight/obesity was 34.7% (n=323) (BMI ≥85th percentile), and rates for AO were 47.4%, 22.7%, and 27.1% as evaluated by WC, WHR, and WHtR, respectively. Moreover, 378 (40.6%) participants had excess body fat as estimated by %BF using TANITA (M=27.6%, 12.0%) (Table 1).

**Table 1. Characteristics of participating adolescents (N = 932)**

| Characteristics     | Frequency (%) or mean±SD |
|---------------------|--------------------------|
| Gender              |                          |
| Male                | 311 (33.4)               |
| Female              | 621 (66.6)               |
| Age (years)         | 15.8±1.4                 |
| Nationality         |                          |
| UAE National        | 569 (61.1)               |
| Non-UAE National    | 363 (38.9)               |
| Type of school      |                          |
| Public              | 498 (53.4)               |
| Private             | 434 (46.6)               |
| Mother's employment |                          |
| Employed            | 250 (26.8)               |
| Unemployed          | 682 (73.2)               |
| Economic status     |                          |
| Below average       | 32 (3.4)                 |
| Average             | 559 (60)                 |

|                                |            |
|--------------------------------|------------|
| Above average                  | 341 (36.6) |
| F/V score                      | 3.1±1.8    |
| ≥5 servings                    | 117 (12.6) |
| <5 servings                    | 815 (87.4) |
| PAQ-A                          | 2.3±0.7    |
| Active (mean score ≥2.75)      | 189 (20.3) |
| Inactive (mean score <2.75)    | 743 (79.7) |
| BMI (kg/m <sup>2</sup> )       | 61.8±33.0  |
| Underweight                    | 79 (8.4)   |
| Normal                         | 530 (56.9) |
| Overweight                     | 158 (17.0) |
| Obese                          | 165 (17.7) |
| WC (cm)                        | 76.8±13.3  |
| Normal                         | 491 (52.7) |
| Abdominal obesity              | 441 (47.3) |
| WHR (cm)                       | 0.83±0.07  |
| Normal                         | 720 (77.3) |
| Abdominal obesity              | 212 (22.7) |
| WHtR (cm)                      | 0.47±0.08  |
| Normal                         | 679 (72.9) |
| Abdominal obesity              | 253 (27.1) |
| %BF                            | 27.6 ±12.0 |
| Normal                         | 554 (59.4) |
| Above normal (excess body fat) | 378 (40.6) |

Abbreviations: SD, standard deviation; F/V, fruits and vegetables intake score; PAQ-A, Physical Activity Questionnaire-Adolescents; BMI, body mass index; WC, waist circumference; WHR, waist to hip ratio; WHtR, waist to height ratio; %BF, body fat percentage.

### Private versus public schools

Table 2 shows the associations between sociodemographic factors, lifestyle variables, and obesity-related indices by school type. Public schools had significantly more Emirati students compared with private schools that had more expatriate students ( $p=0.001$ ). In addition, significantly more participants from public schools (75.1%) had an average family income compared with their counterparts from private schools, where 61% stated they had an above average income ( $p=0.001$ ).

Significantly more participants from public schools consumed <5 F/V servings compared with their private school counterparts ( $p=0.007$ ).

With regards to differences in obesity indicators, significantly more participants attending public schools were overweight/obese ( $BMI \geq 85$ th percentile) compared with those from private schools (37.8% vs. 31.1%) ( $p=0.001$ ). Moreover, significantly more participants from public schools had AO than their counterparts from private schools, as estimated by WHtR ( $p=0.001$ ), WC ( $p=0.028$ ), and WHR ( $p=0.04$ ) (Table 2).

**Table 2. Comparisons between private and public schools (N = 932)**

|                     | Public schools<br>n (%), mean $\pm$ SD<br>(n=498, 53.4%) | Private schools<br>n (%), mean $\pm$ SD<br>(n=434, 46.6%) | p-value <sup>a</sup> |
|---------------------|----------------------------------------------------------|-----------------------------------------------------------|----------------------|
| Gender              |                                                          |                                                           | 0.694                |
| Male                | 169 (33.9)                                               | 142 (32.7)                                                |                      |
| Female              | 329 (66.1)                                               | 292 (67.3)                                                |                      |
| Nationality         |                                                          |                                                           | <0.001               |
| UAE National        | 407 (81.7)                                               | 162 (37.3)                                                |                      |
| Non-UAE National    | 91 (18.3)                                                | 272 (62.7)                                                |                      |
| Mother's employment |                                                          |                                                           | 0.123                |
| Employed            | 144 (28.9)                                               | 106 (24.4)                                                |                      |
| Unemployed          | 354 (71.1)                                               | 328 (75.6)                                                |                      |
| Economic status     |                                                          |                                                           | <0.001               |
| Below average       | 30 (6.0)                                                 | 2 (0.5)                                                   |                      |
| Average             | 374 (75.1)                                               | 167 (38.5)                                                |                      |
| Above average       | 94 (18.9)                                                | 265 (61.0)                                                |                      |
| F/V score           | 3.0 $\pm$ 1.7                                            | 3.1 $\pm$ 1.9                                             |                      |
| $\geq 5$ servings   | 49 (9.8)                                                 | 68 (15.7)                                                 | 0.007                |
| <5 servings         | 449 (90.2)                                               | 366 (84.3)                                                |                      |
| PAQ-A score         | 2.2 $\pm$ 0.70                                           | 2.2 $\pm$ 0.6                                             |                      |
| Active              | 403 (81)                                                 | 340 (78.3)                                                | 0.320                |

|                           |            |              |       |
|---------------------------|------------|--------------|-------|
| Inactive                  | 95 (19)    | 94 (21.7)    |       |
| BMI (kg/m <sup>2</sup> )  |            |              | 0.001 |
| Underweight               | 44 (8.8)   | 35 (8.1)     |       |
| Normal                    | 266 (53.4) | 264 (60.8)   |       |
| Overweight                | 77 (15.5)  | 81 (18.7)    |       |
| Obese                     | 111 (22.3) | 54 (12.4)    |       |
| WC (cm)                   | 78.5 ±15.0 | 74.80 ± 11.0 | 0.028 |
| Normal                    | 247 (49.6) | 247 (57.0)   |       |
| Abdominal obesity         | 251 (50.4) | 187 (43.0)   |       |
| WHR (cm)                  | 0.83±0.07  | 0.83±0.06    |       |
| Normal                    | 372 (74.7) | 348 (80.2)   | 0.04  |
| Abdominal obesity         | 126 (25.3) | 86 (19.8)    |       |
| WHtR (cm)                 | 0.48±0.08  | 0.46±0.06    |       |
| Normal                    | 333 (66.9) | 346 (79.7)   | 0.001 |
| Abdominal obesity         | 165 (33.1) | 88 (20.3)    |       |
| %BF                       | 27.6±10.4  | 25.3±8.9     | 0.510 |
| Normal                    | 301 (60.4) | 253 (58.3)   |       |
| Above normal (excess fat) | 197 (39.6) | 181 (41.7)   |       |

<sup>a</sup>P-values significant at <0.05 based on chi-square tests

Abbreviations: F/V, fruits and vegetables intake score; PAQ-A, Physical Activity Questionnaire-Adolescents; BMI, body mass index; WC, waist circumference; WHR, waist to hip ratio; WHtR, waist to height ratio; %BF, body fat percentage

### Predictors of overweight/obesity: body mass index, AO, and %BF

After adjustment, predictors of being overweight/obese (based on BMI) were: consuming <5 servings of F/V (adj OR 1.88, CI: 1.41, 2.49) and being inactive (adj OR 2.21, CI: 1.51, 3.22). Similarly, consuming <5 servings of F/V and being inactive significantly predicted AO based on WC, WHtR, and %BF (p-values for ORs <0.05) (Table 3).

An examination of participants' characteristics showed that attending a public school contributed to AO (based on WC, WHtR, and WHR) (p-values for ORs <0.05). In addition, being Emirati was independently associated with AO as measured by WC and WHR (p-values for ORs <0.05). Compared with female participants, males had greater odds of having AO (based on WHtR) and were less likely to have high %BF (p-values for ORs <0.05) (Table 3).



**Table 3. Determinants of overweight/obesity based on body mass index, abdominal obesity indicators and total body fat percentage (N = 932)**

| Variables               | BMI-<br>Overweight/Obese |                     | Elevated WC |                     | Elevated WHtR |                     | Elevated WHR |                     | High %BF    |                     |
|-------------------------|--------------------------|---------------------|-------------|---------------------|---------------|---------------------|--------------|---------------------|-------------|---------------------|
|                         | adj<br>OR                | <sup>a</sup> 95% CI | adj<br>OR   | 95% CI              | adj<br>OR     | 95% CI              | adj<br>OR    | 95% CI              | adj<br>OR   | 95% CI              |
| Gender                  |                          |                     |             |                     |               |                     |              |                     |             |                     |
| Male <sup>a</sup>       | 1.27                     | [0.95, 1.71]        | 0.99        | [0.75, 1.31]        | <b>1.51</b>   | <b>[1.11, 2.06]</b> | 1.11         | [0.80, 1.54]        | <b>0.33</b> | <b>[0.24, 0.43]</b> |
| Female                  |                          |                     |             |                     |               |                     |              |                     |             |                     |
| Type of<br>school       |                          |                     |             |                     |               |                     |              |                     |             |                     |
| Private <sup>a</sup>    | 0.81                     | [0.59, 1.11]        | <b>0.62</b> | <b>[0.46, 0.83]</b> | <b>0.47</b>   | <b>[0.33, 0.66]</b> | <b>0.59</b>  | <b>[0.41, 0.84]</b> | 1.16        | [0.85, 1.57]        |
| Public                  |                          |                     |             |                     |               |                     |              |                     |             |                     |
| Nationality             |                          |                     |             |                     |               |                     |              |                     |             |                     |
| Expatriate <sup>a</sup> | 1.20                     | [0.87, 1.65]        | <b>0.65</b> | <b>[0.47, 0.88]</b> | 0.81          | [0.58, 1.15]        | <b>0.63</b>  | <b>[0.44, 0.90]</b> | 1.18        | [0.87, 1.62]        |
| Emirati                 |                          |                     |             |                     |               |                     |              |                     |             |                     |
| F/V score               |                          |                     |             |                     |               |                     |              |                     |             |                     |
| <5servings <sup>a</sup> | <b>1.88</b>              | <b>[1.41, 2.49]</b> | <b>1.54</b> | <b>[1.18, 2.01]</b> | <b>1.35</b>   | <b>[1.10, 1.82]</b> | 1.10         | [0.80, 1.50]        | <b>2.43</b> | <b>[1.58, 3.73]</b> |
| ≥5 servings             |                          |                     |             |                     |               |                     |              |                     |             |                     |
| PAQ-A                   |                          |                     |             |                     |               |                     |              |                     |             |                     |
| Inactive <sup>a</sup>   |                          |                     |             |                     |               |                     |              |                     |             |                     |
| Active                  | <b>2.21</b>              | <b>[1.51, 3.22]</b> | <b>1.78</b> | <b>[1.26, 2.50]</b> | <b>1.64</b>   | <b>[1.10, 2.43]</b> | 1.03         | [0.70, 1.52]        | <b>1.46</b> | <b>[1.04, 2.07]</b> |

Abbreviations: adj OR, adjusted odds ratio; CI, confidence interval; F/V, fruits and vegetables intake score, PAQ-A, Physical Activity Questionnaire-Adolescents; WC, waist circumference; WHR, waist to hip ratio; WHtR, waist to height ratio; %BF, body fat percentage.

<sup>a</sup>Reference category.

Numbers in bold are statistically significant (p-value <0.05).

## DISCUSSION

This study presents new information regarding the epidemiology and determinants of overweight/obesity among UAE school-aged adolescents. We found a considerably high prevalence of overweight/obesity among participants (34.7%), which supported previous UAE-based epidemiological studies that used BMI to define obesity.<sup>4 11 12</sup> The prevalence rates of overweight/obesity observed in our study was also consistent with studies from other Arab countries

1  
2  
3 that used BMI to classify obesity, including Saudi Arabia (39%),<sup>37</sup> Kuwait (44.3%),<sup>38</sup> Lebanon  
4 (32.2%),<sup>39</sup> and Egypt (35%).<sup>40</sup> Conversely, studies conducted in Western countries reported lower  
5 obesity rates compared with our study. For example, the obesity rate among adolescents in European  
6 countries was between 22%–25%, with the rate for Italy<sup>41</sup> being 23.3% (either overweight or obese)  
7 and rates for Greece being 19.1% (overweight) and 3.2% (obesity).<sup>42</sup> In the US, 30% of adolescents  
8 were overweight/obese.<sup>43</sup>

9  
10  
11  
12  
13  
14  
15  
16 In the present study, we also investigated other obesity indicators using AO indices. A concerning  
17 finding in our study was that AO indicators were high (WC 47.4%, WHR 22.8%, and WHtR 27.2%).  
18 Visceral adiposity (as measured by WC, WHR, and WHtR) is associated with an increased risk for  
19 earlier onset of metabolic disorders, and obesity-related morbidity and mortality.<sup>3 8</sup> There are  
20 variations in the literature on indices and values used to define AO in adolescents. For example, El-  
21 Kassas and Ziade<sup>39</sup> reported central obesity rates as evaluated by WC (41.8%) and WHtR (38.3%),  
22 whereas Al Hazza et al.<sup>37</sup> reported abdominal obesity using WHtR (35.9% for adolescent males and  
23 30.3% for females). Abolfotouh et al.<sup>40</sup> reported lower AO rates among Egyptian adolescents using  
24 WHR (16.1%), WC (4.5%), and WHtR (16.7%). These variations may be attributable to geographical  
25 location, genetic compositions, and differing lifestyles, along with different cut-off values for  
26 interpreting AO results.

27  
28  
29  
30  
31  
32  
33  
34  
35  
36  
37  
38  
39 We found that the majority of the participating adolescents showed low physical activity levels  
40 (79.7%) and low F/V consumption (87.4%). A recent study in UAE reported that only around 28%  
41 of Emirati adolescents had the recommended daily F/V intake.<sup>44</sup> As for the low levels of physical  
42 activity, our finding was consistent with a global estimate from the WHO that 81% of those aged  
43 11–17 years did not meet daily physical activity recommendations.<sup>45</sup> It is noteworthy that physical  
44 inactivity and low F/V consumption in adolescence may persist throughout adulthood, which will  
45 increase the risk for chronic lifelong diseases later in life.<sup>45</sup>

#### 53 **Obesity in public versus private schools**

54  
55  
56 Interestingly, we found a higher prevalence of obesity in adolescents from public schools than among  
57 adolescents from private schools (as measured by BMI). Differences in obesity rates between private  
58  
59  
60

1  
2  
3 and public schools have been reported in different countries in studies that used BMI. Similar to our  
4 findings, a study examining obesity rates among students in Palermo reported more public school  
5 students were overweight/obese compared with private school students (age 13 years: 40.8% vs.  
6 34.5%; age 15 years: 36.7% vs. 30.2%).<sup>13</sup> However, other studies have reported contrasting findings.  
7 For example, a study in Kenya found that overweight/obesity rates were significantly higher (29.0%)  
8 among private school children than those from public schools (11.5%).<sup>16</sup> Similar trends of higher  
9 obesity rates in private schools compared with public schools were also observed in studies from  
10 India,<sup>17</sup> Pakistan,<sup>15</sup> and Saudi Arabia.<sup>37</sup> A possible explanation for the inconsistent findings related  
11 to obesity rates between private and public schools could be differences in sociodemographic and  
12 cultural factors of attending students. For example, in the UAE, public schools are mostly attended by  
13 Emirati/national students whereas private schools are mainly attended by expatriates.<sup>19</sup> Therefore,  
14 different eating habits among cultures could contribute to these findings. Furthermore, offering  
15 unhealthy items in vending machines, poor communication between food suppliers and school  
16 personnel, and limited physical activity facilities at schools may be correlated with body weight in  
17 adolescents.<sup>46</sup>

18  
19  
20  
21  
22  
23  
24  
25  
26  
27  
28  
29  
30  
31  
32  
33  
34  
35 Similarly, in our study, public school students had significantly higher AO indicators (WC, WHR,  
36 WHtR) than private school students, which were consistent with our results for BMI values. Most  
37 previous UAE-based studies reported BMI rates and did not examine these obesity indicators.  
38 Similarly, many other studies that compared private and public schools in various countries did not  
39 compare AO indicators.<sup>13 16 17 18</sup> Accordingly, our results align with the recommendation from several  
40 previous research suggesting that in addition to BMI, other anthropometric measurements should be  
41 included as indicators of obesity when screening adolescents in schools (e.g., WC, WHC, and  
42 WHtR).<sup>28 33</sup>

43  
44  
45  
46  
47  
48  
49  
50  
51 Furthermore, we found that participants from public schools consumed significantly less F/V  
52 than those in private schools. Similar findings were reported in previous studies. A comparative study  
53 of Brazilian school children aged 10–12 years (151 from public schools and 55 from private schools)  
54 found that public school participants reported less F/V consumption compared with those from private  
55  
56  
57  
58  
59  
60

1  
2  
3 schools.<sup>47</sup> Similarly, a study from Petrolina-Brazil found that only 28.3% of adolescents in public  
4 schools (n=210, aged 15–17 years) consumed adequate F/V.<sup>48</sup> A recent mixed method study from the  
5 UAE in which the majority of the sample was from public schools (24 public, 10 private) reported  
6 that only 28% of participants (n=620) met the WHO recommended daily F/V intake.<sup>44</sup> The low  
7 consumption of F/V in participants from public schools compared with their private school  
8 counterparts may partially explain the higher obesity indices (BMI and AO) found in public schools.  
9  
10  
11  
12  
13  
14

15 In our study, variations were noted in sociodemographic factors, nationality, and economic status  
16 between participants from private and public schools. These personal factors could play an important  
17 role in determining obesity rates in adolescents,<sup>41 44 49</sup> and therefore warrant further attention.  
18 Understanding the differences between private and public schools and the sociodemographic structure  
19 among adolescents is essential to build focused interventions that overcome barriers to healthy  
20 choices, especially in public schools.  
21  
22  
23  
24  
25  
26  
27

### 28 **Determinants of obesity in participants**

29  
30 Physical activity and F/V intake were strong determinants of overweight/obesity, and showed  
31 independent correlations with different obesity indicators including BMI, AO (WC, WHtR), and  
32 %BF. Other studies have also shown that low levels of physical activity and unhealthy dietary  
33 practices predicted obesity among adolescents.<sup>5</sup> Rapid urbanization and lifestyle changes in the UAE  
34 have increased exposure to fast/processed foods, sedentary lifestyle along with reduced F/V  
35 consumption and less physical activity.<sup>3 13 17</sup> Adolescents tend to spend most of their time playing  
36 computer games, doing homework and similar activities instead of spending time on exercise and  
37 sports.<sup>44</sup> Therefore, promoting healthy lifestyles for adolescents is a public health priority as the WHO  
38 recommends at least 60 minutes of moderate-to-vigorous physical activity each day, and a dietary  
39 intake of at least 400 grams of F/V each day (roughly equivalent to five servings of F/V per day).<sup>50</sup>  
40  
41  
42  
43  
44  
45  
46  
47  
48  
49  
50  
51  
52  
53  
54  
55  
56  
57  
58  
59  
60 Therefore, there is a need to enforce school policies that motivate adolescents to consume the  
recommended intake of F/V and engage in physical activities for better health outcomes. In the school  
environment, guidelines for food consumption inside schools, canteen food menus, and diet and  
exercise self-efficacy must be explored in future studies.<sup>5 44</sup>

1  
2  
3 As noted earlier, special attention must be given to adolescents in public schools because we  
4 found that more participants from public schools had higher AO, consistent with previous studies.<sup>14</sup>  
5 AO has been associated with visceral fat mass, higher blood pressure, and cardiovascular risk factor  
6 clustering, and should be measured along with BMI.<sup>51 52</sup> In adolescents in Poland (141 boys and 168  
7 girls, aged 16–18 years), AO (WC, WHR, WHtR) was associated with family environment and  
8 modifiable lifestyle factors.<sup>52</sup> In the UAE, adolescents come from diverse backgrounds, meaning it is  
9 essential to investigate lifestyle, cultural practices, and genetic factors contributing to AO.  
10 Considering gender differences is critical, as male participants in our study were more likely  
11 to have AO (above normal WHtR) and less likely to have increased %BF compared to girl  
12 participants, which was consistent with previous studies. For example, significantly higher AO  
13 (measured by WHR, WC) was reported in boy adolescents compared to girl adolescents from Poland.  
14  
15  
16  
17  
18  
19  
20  
21  
22  
23  
24  
25  
26  
27  
28  
29  
30  
31  
32  
33  
34  
35  
36  
37  
38  
39  
40  
41  
42  
43  
44  
45  
46  
47  
48  
49  
50  
51  
52  
53  
54  
55  
56  
57  
58  
59  
60

<sup>52</sup> Similarly, in another study from Brazil, higher AO (measured by WC) was reported in male adolescents (n=258) compared to female adolescents (n=443).<sup>53</sup> Focused nutritional and physical activity programs that assess the differences in lifestyles and perceptions of overweight and obesity in male adolescents to are needed to promote better health outcomes. Addressing this issue should involve multiple approaches targeting behavior change (e.g., food labeling, planning “exercise-friendly” cities).

The results from the present study concerning the high obesity prevalence and its determinants confirm the need for a strong and unified policy that considers students’ diverse sociodemographic characteristics, school type and environment, and educational polices when initiating campaigns to combat obesity. Government health campaign interventions and strategies must be established at the federal level to support schools to identify overweight and obese adolescents and increase their awareness about the negative impact of obesity on health outcomes in adolescents.<sup>5 44</sup> A unified and collaborative health promotion model is needed where UAE health officials, teachers, parents, students, and social media are involved as early as possible.<sup>5 50 45</sup> Furthermore, it is recommended that a surveillance system for obesity indicators for UAE adolescents is implemented to monitor the effectiveness of policies aiming to counteract obesity in this population.

## Strengths and limitations

Our study is among the first in the UAE to provide valid estimates of obesity by considering BMI, AO indicators, and %BF. This study highlights the urgent need to screen for obesity in our schools and emphasizes the importance of health promotion campaigns and practices, especially in public schools. Further, the present findings focus on the importance of considering F/V intake and physical activity among adolescents as important predictors of obesity, which can be used to inform the direction of public health policy geared toward improving lifestyle of adolescents.

Many males in higher secondary education move to vocational and technical schools to build their skills, meaning fewer males stay in secondary schools.<sup>19</sup> This trend was reflected in this study where there were fewer male participants than female participants. This limits the generalizability of the study findings. Furthermore, we expected to recruit more adolescents from private schools we as invited more private schools to participate; however, fewer private school participants were recruited for this study. This might be attributable to limited access given by school administration to classes in the private schools cluster. Additional genetic, family, dietary pattern, stress, and social factors should be examined in future studies to provide a comprehensive picture of the determinants of obesity in adolescents.

Despite the use of multiple obesity indices in this study to provide a valid picture of obesity among the UAE adolescent population, we used international cutoff points to classify participants into overweight/obese and normal/underweight groups. Given the overwhelming health risks associated with obesity in adolescents, there is an urgent need for a standardized definition of obesity in adolescents so that trends can be monitored and comparisons made between adolescents of different ethnic groups. Subsequently, established gold standards can be used to determine obese adolescents in clinical practice as well as in relevant epidemiological studies.

## CONCLUSIONS

Our study showed a high prevalence rate of overweight/obesity among school-aged adolescents in the UAE (as measured by BMI), which confirms that obesity remains a widespread problem in UAE

1  
2  
3 schools. This study underscores the importance of early screening of AO indicators (WHtR, WC, and  
4 %BF) in the routine assessment of adolescents in addition to BMI, because AO is associated with high  
5 blood pressure, metabolic syndrome, and cardiometabolic risks. It is also necessary to promote  
6 healthier lifestyles (e.g., healthy eating by increasing F/V intake and increased physical activity)  
7 among children and adolescents to help curb obesity trends and prevent the development of chronic  
8 diseases. Additional studies are needed to observe the changes in obesity rates necessary to achieve  
9 the UAE Vision 2021 National Agenda of a world-class healthcare system by reducing the prevalence  
10 of obesity among children to support a healthy population in our schools.  
11  
12  
13  
14  
15  
16  
17  
18  
19

20 Finally, obesity in adolescents is multifactorial; therefore, further research is needed to examine  
21 the contributions of modifiable and non-modifiable risk factors to obesity among adolescents in  
22 different cultures. Future research should establish cutoff values for different obesity indicators to  
23 yield better screening and diagnosis of obesity among adolescents.  
24  
25  
26  
27

28 **Acknowledgments** The authors would like to thank the Ministry of Education for facilitating the data  
29 collection process. Also, we would like to thank all schools' personnel and students for their time and  
30 effort during the data collection process. Finally, we would like to acknowledge the effort of research  
31 assistants in the data collection process.  
32  
33  
34  
35

36 **Contributors** WBI, HR, RR, RF, NA, AA, SE, SM, AF, and MA conceived of the presented idea.  
37 WB, AA, RF, HR, MA involved in conducted the statistical analyses. WBI, HR, RR, RF, NA, AA,  
38 SE, SM, AF, and MA wrote the initial draft of the manuscript. WBI, HR, RF, AA, MA contributed to  
39 writing the initial results and provided critical review of the manuscript.  
40  
41  
42  
43  
44

45 **Funding Statement** This research was funded by the University of Sharjah/Research Institute for  
46 Medical and Health Sciences\Health Promotion Research Group (Grant number 150310).  
47  
48  
49

50 **Disclaimer** The funding body was not involved in the design of the study nor the collection, analysis,  
51 and, interpretation of data and writing of the manuscript.  
52  
53

54 **Competing interests** None declared.  
55

56 **Patient and public involvement** Patients and/or the public were not involved in the design, or  
57 conduct, or reporting, or dissemination plans of this research.  
58  
59  
60

1  
2  
3 **Patient consent for publication** Not required.  
4

5 **Ethical Considerations** Ethical approval to conduct this study was obtained from the Research Ethics  
6  
7 Committee of the principal investigator's institution, the UAE Ministry of Health and Prevention, and  
8  
9 the UAE Ministry of Education. Parental consent was obtained for each student that agreed to  
10  
11 participate in this study.  
12

13 **Provenance and peer review** Not commissioned; externally peer reviewed.  
14

15 **Data availability statement** The datasets used and analyzed during the present study are available  
16  
17 from the corresponding author on reasonable request.  
18  
19  
20  
21  
22  
23  
24  
25  
26  
27  
28  
29  
30  
31  
32  
33  
34  
35  
36  
37  
38  
39  
40  
41  
42  
43  
44  
45  
46  
47  
48  
49  
50  
51  
52  
53  
54  
55  
56  
57  
58  
59  
60



## REFERENCES

1. World Health Organization. Facts and figures on childhood obesity. Available: <https://www.who.int/end-childhood-obesity/facts/en/>. [Accessed August 8 2019].
2. World Health Organization. Obesity and overweight (2018). Available: <https://www.who.int/news-room/fact-sheets/detail/obesity-and-overweight>. [Accessed August 8 2019].
3. Farrag NS, Cheskin LJ, Farag MK. A systematic review of childhood obesity in the Middle East and North Africa (MENA) region: Health impact and management. *Adv Pediatr Res*. 2017; 4:6.
4. AlBlooshi A, Shaban S, AlTunaiji M, Fares N, AlShehhi L, AlShehhi H, et al. Increasing obesity rates in school children in United Arab Emirates. *Obesity Science & Practice*. 2016;2(2):196-202.
5. Moonesar IA, Hickman CJL. How the UAE can reduce the prevalence of obesity among the youth? - A health policy perspective. *Advances in Obesity, Weight Management & Control*. 2017;6(2):64-68.
6. Barton M. Childhood obesity: a life-long health risk. *Acta Pharmacol Sin*. 2012;33(2):189-193.
7. Simmonds M, Llewellyn A, Owen CG, Woolacott N. Predicting adult obesity from childhood obesity: a systematic review and meta-analysis. *Obes Rev*. 2015;17(2):95-107.
8. Buscot MJ, Thomson RJ, Juonala M, Sabin MA, Burgner DP, Lehtimäki T, et al. BMI trajectories associated with resolution of elevated youth BMI and incident adult obesity. *Pediatr*. 2018;141(1):e20172003.
9. Al Amiri E, Abdullatif M, Abdulle A, Al Bitar N, Afandi EZ, Parish M, et al. The prevalence, risk factors, and screening measure for prediabetes and diabetes among Emirati overweight/obese children and adolescents. *BMC Public Health*. 2015;15:1298.
10. Global School-based Student Health Survey. United Arab Emirates 2016 Fact Sheet. Available: <https://www.who.int/ncds/surveillance/gshs/UAE-2016-gshs-fact-sheet.pdf?ua=1>. [Accessed August 8, 2019].

11. Al Junaibi A, Abdulle A, Sabri S, Hag-Ali M, Nagelkerke N. The prevalence and potential determinants of obesity among school children and adolescents in Abu Dhabi, United Arab Emirates. *Int J Obes (Lond)*. 2013;37(1):68-74.
12. Bin Zaal AA, Musaiger AO, D'Souza R. Dietary habits associated with obesity among adolescents in Dubai, United Arab Emirates. *Nutr Hosp*. 2009;24(4):437-444.
13. Provenzano S, Santangelo OE, Catalano R, Marchese V, Bonanno V, La Placa S, et al. Determinants associated with obesity and physical activity in the public and private schools of the city of Palermo. *Acta Med Mediterr*. 2018;34(2):443-448.
14. Li J, Hooker NH. Childhood obesity and schools: Evidence from the National Survey of Children's Health. *J School Health*. 2010;80(2):96-103.
15. Mansoori, Naveed, et al. "Prevalence of obesity and its risk factors among school children in Karachi, Pakistan." *Tropical doctor*. 2018; 48: 266-269.
16. Kyallo F, Makokha A, Mwangi AM. Overweight and obesity among public and private primary school children in Nairobi, Kenya. *Health*. 2013;5(8):85.
17. Sangwan D. A study of body mass index between private and government school children. *Int. J. Phys. Educ. Sports Health*. 2016;3(1):63-65.
18. Shi J, Tan D, Xie H, Yang B, Liu R, Yu D, et al. Unequal distribution of overweight adolescents in immigrant-rich areas: Analysis of disparities among public and private school students in Shanghai, China. *Int J Environ Res Public Health*. 2017;14:252.
19. Ministry of Education. Available: <https://www.moe.gov.ae/Ar/OpenData/Documents/2017-2018.pdf>. [Accessed 27 July 2020].
20. Levy PS, Lemeshow S. *Sampling of populations: methods and applications*. John Wiley & Sons; 2013.
21. Naing L, Winn T, Rusli BN. Practical issues in calculating the sample size for prevalence studies. *Archives of orofacial Sciences*. 2006;1:9-14.

- 1  
2  
3 22. Kowalski K, Crocker P, Donen R. The Physical Activity Questionnaire for Older Children (PAQ-  
4 C) and Adolescents (PAQ-A) manual. Saskatoon, Canada: University of Saskatchewan. 2004.  
5 Available: <https://www.researchgate.net/publication/228441462>. [Accessed March 25 2019].  
6  
7  
8
- 9 23. Janz KF, Lutuchy EM, Wenthe P, Levy SM. Measuring activity in children and adolescents using  
10 self-report: PAQ-C and PAQ-A. *Med Sci Sports Exerc*. 2008;40:767-772.  
11  
12
- 13 24. Platat C, Jarrar A. Reliability and validity of a physical activity questionnaire in children. *Int J Food*  
14 *Sci Nutr*. 2012;63(6):637-44.  
15  
16
- 17 25. Greene GW, Resnicow K, Thompson FE, Peterson KE, Hurley TG, Hebert JR et al.  
18 Correspondence of the NCI Fruit and Vegetable Screener to repeat 24-H recalls and serum  
19 carotenoids in behavioral intervention trials. *J Nutr*. 2008;138(1):200S-204S.  
20  
21  
22
- 23 26. Thompson FE, Midthune D, Kahle L, Dodd KW. Development and evaluation of the National  
24 Cancer Institute's dietary screener questionnaire scoring algorithms. *J Nutr*. 2017;147(6):1226-  
25 1233.  
26  
27  
28
- 29 27. Alsunni AA, Badar A. Fruit and vegetable consumption and its determinants among Saudi  
30 university students. *J Taibah Univ Sci*. 2015;10(2):201-207.  
31  
32  
33
- 34 28. World Health Organization. Waist circumference and waist-hip ratio: Report of a WHO Expert  
35 Consultation Geneva, 8-11 December 2008. Available:  
36 [https://apps.who.int/iris/bitstream/handle/10665/44583/9789241501491\\_eng.pdf?sequence](https://apps.who.int/iris/bitstream/handle/10665/44583/9789241501491_eng.pdf?sequence=1)  
37 =1. [Accessed August 8 2019].  
38  
39  
40  
41  
42
- 43 29. Ashwell M. Charts to assess the health risks of obesity. *Open Obes J*. 2011;3:78-84.  
44  
45
- 46 30. de Onis M, Onyango AW, Borghi E, Siyam A, Nishida C, Siekmann J. Development of a WHO  
47 growth reference for school-aged children and adolescents. *Bull World Health Org*.  
48 2007;85(9):660-667.  
49  
50  
51
- 52 31. Center for disease controls and prevention. Defining childhood obesity. Available:  
53 <https://www.cdc.gov/obesity/childhood/defining.html>. [Accessed 27 July 2020]  
54  
55
- 56 32. Zimmermann MB, Gübeli C, Püntener C, Molinari L. Detection of overweight and obesity in  
57 national sample of 6-12-y-old Swiss children: Accuracy and validity of reference values for body  
58  
59  
60

- 1  
2  
3 mass index from the US Centers for Disease Control and Prevention and International Obesity  
4 Task Force. *Am J Clin Nutr.* 2004;79:838–43  
5  
6  
7  
8 33. Center for Disease Control and Prevention. Body Mass Index: Considerations for Practitioner:  
9 Available” <https://www.cdc.gov/obesity/downloads/bmiforpractitioners.pdf>. [Accessed 27  
10 July 2020]  
11  
12  
13  
14 34. Kyle UG, Bosaeus I, De Lorenzo AD, Deurenberg P, Elia M, Gómez JM, et al. Bioelectrical  
15 impedance analysis --part I: review of principles and methods. *Clin Nutr.* 2004;23(5):1226-1243.  
16  
17  
18 35. von Hurst PR, Walsh DC, Conlon CA, Ingram M, Kruger R, Stonehouse W. Validity and  
19 reliability of bioelectrical impedance analysis to estimate body fat percentage against air  
20 displacement plethysmography and dual-energy X-ray absorptiometry. *Nutr Diet.*  
21 2016;73(2):197-204.  
22  
23  
24  
25  
26  
27 36. McCarthy HD, Samani-Radia D, Jebb SA, Prentice AM. Skeletal muscle mass reference curves for  
28 children and adolescents. *Pediatr. Obes.* 2014 Aug;9(4):249-59.  
29  
30  
31 37. Al-Hazzaa HM, Al-Sobayel HI, Musaiger AO. Convergent validity of the Arab Teens Lifestyle  
32 Study (ATLS) physical activity questionnaire. *Int J Environ Res Public Health.* 2011;8(9):3810-  
33 3820.  
34  
35  
36  
37 38. El-Bayoumy I, Shady I, Lotfy H. Prevalence of obesity among adolescents (10 to 14 years) in  
38 Kuwait. *Asia Pac J Public Health.* 2009;21(2):153-159.  
39  
40  
41  
42 39. El-Kassas G, Ziade F. Exploration of the risk factors of generalized and central obesity among  
43 adolescents in North Lebanon. *J Environ Public Health.* 2017. Available:  
44 <https://www.ncbi.nlm.nih.gov/pubmed/29056975>. [Accessed March 25 2019].  
45  
46  
47  
48 40. Abolfotouh MA, Sallam SA, Mohammed MS, Loutfy AA, Hasab AA. Prevalence of elevated  
49 blood pressure and association with obesity in Egyptian school adolescents. *Int J Hypertens.* 2011;  
50 952537.  
51  
52  
53  
54 41. Galfo M, D’Addezio L, Censi L, Roccaldo R, Martone D. Overweight and obesity in Italian  
55 adolescents: Examined prevalence and socio-demographic factors. *Cent Eur J Public Health.*  
56 2016;24(4):262-267.  
57  
58  
59  
60

- 1  
2  
3 42. Krassas GE, Tzotzas T, Tsametis C, Konstantinidis T. Prevalence and trends in overweight and  
4 obesity among children and adolescents in Thessaloniki, Greece. *J Pediatr Endocrinol Metab.*  
5 2001;14:1319-1326.  
6  
7  
8  
9 43. Bibiloni M, Pons A, Tur JA. Prevalence of overweight and obesity in adolescents: a systematic  
10 review. *ISRN Obes.* 2013. Retrieved: <https://www.ncbi.nlm.nih.gov/pubmed/24555142>.  
11 [Accessed 27 July 2020].  
12  
13  
14  
15 44. Makansi N, Allison P, Awad M, Bedos C. Fruit and vegetable intake among Emirati adolescents: a  
16 mixed methods study. *East Mediterr Health J.* 2018;24(7):653-663.  
17  
18  
19  
20 45. World Health Organization. Global recommendations on physical activity for health. (2010). joint  
21 WHO/FAO Expert Consultation. Diet, Nutrition and the Prevention of Chronic Diseases. WHO  
22 Technical Report Series. Available: [https://](https://apps.who.int/iris/bitstream/handle/10665/42665/WHO_TRS_916.pdf?sequence=1)  
23 [apps.who.int/iris/bitstream/handle/10665/42665/WHO\\_TRS\\_916.pdf?sequence=1](https://apps.who.int/iris/bitstream/handle/10665/42665/WHO_TRS_916.pdf?sequence=1). [Accessed  
24 March 25 2019].  
25  
26  
27  
28  
29  
30 46. Dighe S, Lloyd K, Acciai F, Martinelli S, Yedidia MJ, Ohri-Vachaspati P. Healthier school food  
31 and physical activity environments are associated with lower student body mass index. *Preventive*  
32 *Medicine Reports.* 2020 May 8:101115.  
33  
34  
35  
36 47. Ferreira CS, Silva DA, Gontijo CA, Rinaldi AE. Consumption of minimally processed and ultra-  
37 processed foods among students from public and private schools. *Revista Paulista de Pediatria.*  
38 2019 Apr;37(2):173-80  
39  
40  
41  
42  
43 48. de Omena Messias CM, Mendes ML, Santos CN, Garcia EI, Martim WC. Consumo de frutas,  
44 legumes e verduras por adolescentes de uma escola pública de Petrolina-Pernambuco.  
45 *Adolescencia e Saude.* 2016;13(4):81-8.  
46  
47  
48  
49 49. de Bont J, Díaz Y, Casas M, García-Gil M, Vrijheid M, Duarte-Salles T. Time Trends and  
50 Sociodemographic Factors Associated With Overweight and Obesity in Children and Adolescents  
51 in Spain. *JAMA Network Open.* 2020 Mar 2;3(3):e201171-  
52  
53  
54  
55 50. World Health Organization. 2020. Global recommendations on physical activity for health.  
56 Available: [https://www.who.int/dietphysicalactivity/factsheet\\_recommendations/en/](https://www.who.int/dietphysicalactivity/factsheet_recommendations/en/)  
57  
58  
59  
60

- 1  
2  
3 51. Dulskiene V, Kuciene R, Medzioniene J, Benetis R. Association between obesity and high blood  
4 pressure among Lithuanian adolescents: a cross-sectional study. *Ital J Pediatr.* 2014;40(1):102.  
5  
6  
7 52. Błaszczyk-Bębenek E, Piórecka B, Płonka M, Chmiel I, Jagielski P, Tuleja K, Schlegel-Zawadzka  
8 M. Risk Factors and Prevalence of Abdominal Obesity among Upper-Secondary Students. *Int J*  
9  
10  
11  
12  
13  
14 53. Farias ES, Carvalho WR, Moreira KF, Santos JP, Goncalves LG, Gemelli IF, Souza OF,  
15  
16 Rodrigues RV. Sociodemographic and Behavioral Factors Associated with Excess Body Fat in  
17  
18 Brazilian Adolescents. *J. Hum. Sport Exerc.* 2019 1;16(3).  
19  
20  
21  
22  
23  
24  
25  
26  
27  
28  
29  
30  
31  
32  
33  
34  
35  
36  
37  
38  
39  
40  
41  
42  
43  
44  
45  
46  
47  
48  
49  
50  
51  
52  
53  
54  
55  
56  
57  
58  
59  
60



**Figure 1** Flow diagram of data collection process and analysis

STROBE Statement—checklist of items that should be included in reports of observational studies

**Prevalence and determinants of overweight/obesity among school-aged adolescents in the United Arab Emirates: A cross sectional study of private and public schools**

|                           | Item No. | Recommendation                                                                                                                                  | Page No. | Relevant text from manuscript                                                                                                                                                                                                                                                                                                                                                                                                                                               |
|---------------------------|----------|-------------------------------------------------------------------------------------------------------------------------------------------------|----------|-----------------------------------------------------------------------------------------------------------------------------------------------------------------------------------------------------------------------------------------------------------------------------------------------------------------------------------------------------------------------------------------------------------------------------------------------------------------------------|
| <b>Title and abstract</b> | 1        | (a) Indicate the study's design with a commonly used term in the title or the abstract                                                          | 1        | See title page and abstract<br>Prevalence and determinants of overweight/obesity among school-aged adolescents in the United Arab Emirates: A cross sectional study of private and public schools                                                                                                                                                                                                                                                                           |
|                           |          | (b) Provide in the abstract an informative and balanced summary of what was done and what was found                                             | 2-3      | See abstract section                                                                                                                                                                                                                                                                                                                                                                                                                                                        |
| <b>Introduction</b>       |          |                                                                                                                                                 |          |                                                                                                                                                                                                                                                                                                                                                                                                                                                                             |
| Background/rationale      | 2        | Explain the scientific background and rationale for the investigation being reported                                                            | 5-7      | See background section                                                                                                                                                                                                                                                                                                                                                                                                                                                      |
| Objectives                | 3        | State specific objectives, including any prespecified hypotheses                                                                                | 7        | In this study, we explored the epidemiology of overweight and obesity in the total population and compared obesity figures between private and public schools. We also aimed to determine factors that contributed to overweight and obesity in participants including sociodemographic factors (sex, age, nationality, parents' employment and socioeconomic status); school type (public vs. private); and lifestyle factors (F/V consumption, physical activity levels). |
| <b>Methods</b>            |          |                                                                                                                                                 |          |                                                                                                                                                                                                                                                                                                                                                                                                                                                                             |
| Study design              | 4        | Present key elements of study design early in the paper                                                                                         | 7        | We adopted a quantitative correlational design                                                                                                                                                                                                                                                                                                                                                                                                                              |
| Setting                   | 5        | Describe the setting, locations, and relevant dates, including periods of recruitment, exposure, follow-up, and data collection                 | 7-8      | See subjects and methods                                                                                                                                                                                                                                                                                                                                                                                                                                                    |
| Participants              | 6        | (a) <i>Cohort study</i> —Give the eligibility criteria, and the sources and methods of selection of participants. Describe methods of follow-up |          |                                                                                                                                                                                                                                                                                                                                                                                                                                                                             |



|                              |    |                                                                                                                                                                                                                                                                                                                              |              |                                                                                                                                                                                                          |
|------------------------------|----|------------------------------------------------------------------------------------------------------------------------------------------------------------------------------------------------------------------------------------------------------------------------------------------------------------------------------|--------------|----------------------------------------------------------------------------------------------------------------------------------------------------------------------------------------------------------|
|                              |    | <p><i>Case-control study</i>—Give the eligibility criteria, and the sources and methods of case ascertainment and control selection. Give the rationale for the choice of cases and controls</p> <p><i>Cross-sectional study</i>—Give the eligibility criteria, and the sources and methods of selection of participants</p> | 8            |                                                                                                                                                                                                          |
|                              |    | <p>(b) <i>Cohort study</i>—For matched studies, give matching criteria and number of exposed and unexposed</p> <p><i>Case-control study</i>—For matched studies, give matching criteria and the number of controls per case</p>                                                                                              | Not relevant |                                                                                                                                                                                                          |
| Variables                    | 7  | Clearly define all outcomes, exposures, predictors, potential confounders, and effect modifiers. Give diagnostic criteria, if applicable                                                                                                                                                                                     | 9-11         | See measurement section (page 9-10), also data analysis section (page 11)                                                                                                                                |
| Data sources/<br>measurement | 8* | For each variable of interest, give sources of data and details of methods of assessment (measurement). Describe comparability of assessment methods if there is more than one group                                                                                                                                         | 9-10         | Full descriptions of all variables measured provided –under measurement section                                                                                                                          |
| Bias                         | 9  | Describe any efforts to address potential sources of bias                                                                                                                                                                                                                                                                    | 8-9, 11      | <p>We used trained research assistants</p> <p>The same research team collected the data</p> <p>Random selection of school through cluster sampling</p> <p>Multivariate logistic regression (page 11)</p> |
| Study size                   | 10 | Explain how the study size was arrived at                                                                                                                                                                                                                                                                                    | 8            | See last paragraph of participants and samples                                                                                                                                                           |

Continued on next page

|                        |     |                                                                                                                                                                                                                                                                                                           |                                                     |                                                                                                |
|------------------------|-----|-----------------------------------------------------------------------------------------------------------------------------------------------------------------------------------------------------------------------------------------------------------------------------------------------------------|-----------------------------------------------------|------------------------------------------------------------------------------------------------|
| Quantitative variables | 11  | Explain how quantitative variables were handled in the analyses.<br>If applicable, describe which groupings were chosen and why                                                                                                                                                                           | 11                                                  | Data analysis section                                                                          |
| Statistical methods    | 12  | (a) Describe all statistical methods, including those used to control for confounding                                                                                                                                                                                                                     | 11                                                  | Data analysis section                                                                          |
|                        |     | (b) Describe any methods used to examine subgroups and interactions                                                                                                                                                                                                                                       |                                                     |                                                                                                |
|                        |     | (c) Explain how missing data were addressed                                                                                                                                                                                                                                                               | 11                                                  | Results section, paragraph 1<br>Missing and incomplete data were eliminated from the analyses. |
|                        |     | (d) <i>Cohort study</i> —If applicable, explain how loss to follow-up was addressed<br><i>Case-control study</i> —If applicable, explain how matching of cases and controls was addressed<br><i>Cross-sectional study</i> —If applicable, describe analytical methods taking account of sampling strategy | 11                                                  |                                                                                                |
|                        |     | (e) Describe any sensitivity analyses                                                                                                                                                                                                                                                                     | NA                                                  |                                                                                                |
| <b>Results</b>         |     |                                                                                                                                                                                                                                                                                                           |                                                     |                                                                                                |
| Participants           | 13* | (a) Report numbers of individuals at each stage of study—eg numbers potentially eligible, examined for eligibility, confirmed eligible, included in the study, completing follow-up, and analysed                                                                                                         | 11                                                  | Results section, paragraph 1                                                                   |
|                        |     | (b) Give reasons for non-participation at each stage                                                                                                                                                                                                                                                      | 11                                                  | Results section, paragraph 1                                                                   |
|                        |     | (c) Consider use of a flow diagram                                                                                                                                                                                                                                                                        | Included as separate file<br><br>(available online) | Figure 1                                                                                       |
| Descriptive data       | 14* | (a) Give characteristics of study participants (eg demographic, clinical, social) and information on exposures and potential confounders                                                                                                                                                                  | 11-12                                               | Participants' characteristics and obesity-related indices<br>Table 1                           |
|                        |     | (b) Indicate number of participants with missing data for each variable of interest                                                                                                                                                                                                                       | NA                                                  |                                                                                                |
|                        |     | (c) <i>Cohort study</i> —Summarise follow-up time (eg, average and total amount)                                                                                                                                                                                                                          | NA                                                  |                                                                                                |

1  
2  
3  
4  
5  
6  
7  
8  
9  
10  
11  
12  
13  
14  
15  
16  
17  
18  
19  
20  
21  
22  
23  
24  
25  
26  
27  
28  
29  
30  
31  
32  
33  
34  
35  
36  
37  
38  
39  
40  
41  
42  
43  
44  
45  
46

|              |     |                                                                                                                                                                                                              |       |                 |
|--------------|-----|--------------------------------------------------------------------------------------------------------------------------------------------------------------------------------------------------------------|-------|-----------------|
| Outcome data | 15* | <i>Cohort study</i> —Report numbers of outcome events or summary measures over time                                                                                                                          | NA    |                 |
|              |     | <i>Case-control study</i> —Report numbers in each exposure category, or summary measures of exposure                                                                                                         | NA    |                 |
|              |     | <i>Cross-sectional study</i> —Report numbers of outcome events or summary measures                                                                                                                           | 11-17 | Results section |
| Main results | 16  | (a) Give unadjusted estimates and, if applicable, confounder-adjusted estimates and their precision (eg, 95% confidence interval). Make clear which confounders were adjusted for and why they were included | 11-17 | Results section |
|              |     | (b) Report category boundaries when continuous variables were categorized                                                                                                                                    | 11-17 | Results section |
|              |     | (c) If relevant, consider translating estimates of relative risk into absolute risk for a meaningful time period                                                                                             | NA    |                 |

Continued on next page

For peer review only

|                          |    |                                                                                                                                                                            |       |                                                                                                                                                                 |
|--------------------------|----|----------------------------------------------------------------------------------------------------------------------------------------------------------------------------|-------|-----------------------------------------------------------------------------------------------------------------------------------------------------------------|
| Other analyses           | 17 | Report other analyses done—eg analyses of subgroups and interactions, and sensitivity analyses                                                                             | NA    |                                                                                                                                                                 |
| <b>Discussion</b>        |    |                                                                                                                                                                            |       |                                                                                                                                                                 |
| Key results              | 18 | Summarise key results with reference to study objectives                                                                                                                   | 16-20 | Discussion section                                                                                                                                              |
| Limitations              | 19 | Discuss limitations of the study, taking into account sources of potential bias or imprecision. Discuss both direction and magnitude of any potential bias                 | 21    | See strengths limitation section                                                                                                                                |
| Interpretation           | 20 | Give a cautious overall interpretation of results considering objectives, limitations, multiplicity of analyses, results from similar studies, and other relevant evidence | 21    | See strengths limitation section                                                                                                                                |
| Generalisability         | 21 | Discuss the generalisability (external validity) of the study results                                                                                                      | 21    | See strengths limitation section                                                                                                                                |
| <b>Other information</b> |    |                                                                                                                                                                            |       |                                                                                                                                                                 |
| Funding                  | 22 | Give the source of funding and the role of the funders for the present study and, if applicable, for the original study on which the present article is based              | 21    | This research was funded by the University of Sharjah/Research Institute for Medical and Health Sciences\ Health Promotion Research Group (Grant number 150310) |

\*Give information separately for cases and controls in case-control studies and, if applicable, for exposed and unexposed groups in cohort and cross-sectional studies.

**Note:** An Explanation and Elaboration article discusses each checklist item and gives methodological background and published examples of transparent reporting. The STROBE checklist is best used in conjunction with this article (freely available on the Web sites of PLoS Medicine at <http://www.plosmedicine.org/>, Annals of Internal Medicine at <http://www.annals.org/>, and Epidemiology at <http://www.epidem.com/>). Information on the STROBE Initiative is available at [www.strobe-statement.org](http://www.strobe-statement.org).

# BMJ Open

## Prevalence and determinants of overweight/obesity among school-aged adolescents in the United Arab Emirates: A cross-sectional study of private and public schools

|                                 |                                                                                                                                                                                                                                                                                                                                                                                                                                                                                                                                                                                                                                                                                                                                                                                                                                                                                                                                                                                                                                                                                                                                                                                                                                                                                                                                                                                                                                                                                                  |
|---------------------------------|--------------------------------------------------------------------------------------------------------------------------------------------------------------------------------------------------------------------------------------------------------------------------------------------------------------------------------------------------------------------------------------------------------------------------------------------------------------------------------------------------------------------------------------------------------------------------------------------------------------------------------------------------------------------------------------------------------------------------------------------------------------------------------------------------------------------------------------------------------------------------------------------------------------------------------------------------------------------------------------------------------------------------------------------------------------------------------------------------------------------------------------------------------------------------------------------------------------------------------------------------------------------------------------------------------------------------------------------------------------------------------------------------------------------------------------------------------------------------------------------------|
| Journal:                        | <i>BMJ Open</i>                                                                                                                                                                                                                                                                                                                                                                                                                                                                                                                                                                                                                                                                                                                                                                                                                                                                                                                                                                                                                                                                                                                                                                                                                                                                                                                                                                                                                                                                                  |
| Manuscript ID                   | bmjopen-2020-038667.R2                                                                                                                                                                                                                                                                                                                                                                                                                                                                                                                                                                                                                                                                                                                                                                                                                                                                                                                                                                                                                                                                                                                                                                                                                                                                                                                                                                                                                                                                           |
| Article Type:                   | Original research                                                                                                                                                                                                                                                                                                                                                                                                                                                                                                                                                                                                                                                                                                                                                                                                                                                                                                                                                                                                                                                                                                                                                                                                                                                                                                                                                                                                                                                                                |
| Date Submitted by the Author:   | 04-Oct-2020                                                                                                                                                                                                                                                                                                                                                                                                                                                                                                                                                                                                                                                                                                                                                                                                                                                                                                                                                                                                                                                                                                                                                                                                                                                                                                                                                                                                                                                                                      |
| Complete List of Authors:       | <p>baniissa, wegdan; University of Sharjah, Research Institute for Medical and Health Sciences, College of Health Sciences, Nursing Department, University of Sharjah</p> <p>Radwan, Hadia; University of Sharjah, Research Institute for Medical and Health Sciences, College of Health Sciences, Clinical dietetics and nutrition</p> <p>Rossiter, Rachel; Charles Sturt University</p> <p>Fakhry, Randa; Research Institute for Medical and Health Sciences, College of Health Sciences, Department of Nursing, University of Sharjah, Sharjah, UAE</p> <p>Al-Yateem, Nabeel ; Research Institute for Medical and Health Sciences, College of Health Sciences, Department of Nursing, University of Sharjah, Sharjah, UAE</p> <p>Al shujairi, Arwa; Research Institute for Medical and Health Sciences, university of Sharjah</p> <p>Enayah, Sana; Ajman University, 7Department of Clinical Sciences, College of Pharmacy and Health Sciences</p> <p>Macridis, soultana; University of Alberta, Centre for Active Living Faculty of Kinesiology, Sport, and Recreation</p> <p>Farghaly, Abeer; Cairo University Kasr Alainy Faculty of Medicine, Department of cardiology and geriatric physical therapy, Faculty of physiotherepay</p> <p>Naing, Lin; PAPRSB Institute of Health Sciences, Universiti Brunei Darussalam, Brunei</p> <p>Awad, M. A.; Research Institute for Medical and Health Sciences, College of Dental Medicine-Department of Preventive &amp; Restorative Dentistry</p> |
| <b>Primary Subject Heading</b>: | Nutrition and metabolism                                                                                                                                                                                                                                                                                                                                                                                                                                                                                                                                                                                                                                                                                                                                                                                                                                                                                                                                                                                                                                                                                                                                                                                                                                                                                                                                                                                                                                                                         |
| Secondary Subject Heading:      | Public health, Epidemiology, Nursing                                                                                                                                                                                                                                                                                                                                                                                                                                                                                                                                                                                                                                                                                                                                                                                                                                                                                                                                                                                                                                                                                                                                                                                                                                                                                                                                                                                                                                                             |
| Keywords:                       | Nutrition < TROPICAL MEDICINE, PUBLIC HEALTH, NUTRITION & DIETETICS                                                                                                                                                                                                                                                                                                                                                                                                                                                                                                                                                                                                                                                                                                                                                                                                                                                                                                                                                                                                                                                                                                                                                                                                                                                                                                                                                                                                                              |
|                                 |                                                                                                                                                                                                                                                                                                                                                                                                                                                                                                                                                                                                                                                                                                                                                                                                                                                                                                                                                                                                                                                                                                                                                                                                                                                                                                                                                                                                                                                                                                  |

1  
2  
3  
4  
5  
6  
7  
8  
9  
10  
11  
12  
13  
14  
15  
16  
17  
18  
19  
20  
21  
22  
23  
24  
25  
26  
27  
28  
29  
30  
31  
32  
33  
34  
35  
36  
37  
38  
39  
40  
41  
42  
43  
44  
45  
46  
47  
48  
49  
50  
51  
52  
53  
54  
55  
56  
57  
58  
59  
60





I, the Submitting Author has the right to grant and does grant on behalf of all authors of the Work (as defined in the below author licence), an exclusive licence and/or a non-exclusive licence for contributions from authors who are: i) UK Crown employees; ii) where BMJ has agreed a CC-BY licence shall apply, and/or iii) in accordance with the terms applicable for US Federal Government officers or employees acting as part of their official duties; on a worldwide, perpetual, irrevocable, royalty-free basis to BMJ Publishing Group Ltd ("BMJ") its licensees and where the relevant Journal is co-owned by BMJ to the co-owners of the Journal, to publish the Work in this journal and any other BMJ products and to exploit all rights, as set out in our [licence](#).

The Submitting Author accepts and understands that any supply made under these terms is made by BMJ to the Submitting Author unless you are acting as an employee on behalf of your employer or a postgraduate student of an affiliated institution which is paying any applicable article publishing charge ("APC") for Open Access articles. Where the Submitting Author wishes to make the Work available on an Open Access basis (and intends to pay the relevant APC), the terms of reuse of such Open Access shall be governed by a Creative Commons licence – details of these licences and which [Creative Commons](#) licence will apply to this Work are set out in our licence referred to above.

Other than as permitted in any relevant BMJ Author's Self Archiving Policies, I confirm this Work has not been accepted for publication elsewhere, is not being considered for publication elsewhere and does not duplicate material already published. I confirm all authors consent to publication of this Work and authorise the granting of this licence.

1  
2  
3 **Prevalence and determinants of overweight/obesity among school-aged adolescents in the**  
4  
5 **United Arab Emirates: A cross sectional study of private and public schools**  
6

7 \*Wegdan Bani Issa<sup>1</sup>, PhD, Associate Professor  
8

9 Hadia Radwan<sup>2</sup>, PhD, Assistant Professor  
10

11 Rachel Rossiter<sup>3</sup>, HScD, Associate Professor  
12

13 Randa Fakhry<sup>1</sup>, Lecturer  
14

15 Nabeel Al Yateem<sup>1</sup>, PhD, Associate Professor  
16

17 Arwa Al-Shujairi<sup>4</sup>, MPH, Research Assistant  
18

19 Sana Enayah<sup>5</sup>, PharmD, PhD, Associate Professor  
20

21 Soultana Macridis<sup>6</sup>, PhD, Research Associate  
22

23 Abeer Farghaly<sup>7</sup>, Cairo University, Egypt  
24

25 Lin Naing<sup>8</sup>, MD, Professor  
26

27 Manal Awad<sup>9</sup>, PhD, Professor  
28  
29  
30  
31  
32

33 <sup>1</sup>Research Institute for Medical and Health Sciences, College of Health Sciences, Department of  
34 Nursing, University of Sharjah, Sharjah, UAE

35 <sup>2</sup>Research Institute for Medical and Health Sciences, College of Health Science-Department of  
36 Clinical Nutrition and Dietetics, University of Sharjah, UAE

37 <sup>3</sup> Charles Sturt University, Australia  
38

39 <sup>4</sup>Research Institute for Medical and Health Sciences, University of Sharjah, UAE  
40

41 <sup>5</sup>Department of Clinical Sciences, College of Pharmacy and Health Sciences, Ajman University,  
42 Ajman, UAE

43 <sup>6</sup>Centre for Active Living-Faculty of Kinesiology, Sport, and Recreation, Canada University of  
44 Alberta, Alberta, Canada

45 <sup>7</sup>University of Cairo, Faculty of physical Therapy, Egypt  
46

47 <sup>8</sup>PAPRSB Institute of Health Sciences, Universiti Brunei Darussalam, Brunei  
48

49 <sup>9</sup>Research Institute for Medical and Health Sciences, College of Dental Medicine-Department of  
50 Preventive & Restorative Dentistry, University of Sharjah, UAE

51 **\*Corresponding author:**

52 Wegdan Bani Issa, PhD, MSN, RN

53 Associate Professor

54 College of Health Sciences

55 University of Sharjah

56 P.O. Box 27272 Sharjah

57 United Arab Emirates

58 Phone: +971-65057522. Email: wbaniissa@sharjah.ac.ae  
59  
60



1  
2  
3 **Word count: 5441**

4  
5 **ABSTRACT**

6  
7 **Objectives** To estimate the prevalence and predictors of obesity among adolescents in the  
8  
9 United Arab Emirates.

10  
11 **Design** Cross-sectional study.

12  
13 **Setting** Private and public secondary schools.

14  
15 **Participants** Adolescents aged 13–19 years; 434 (46.6%) from private schools and 498  
16  
17 (53.4%) from public schools.

18  
19 **Measures** A Self-report questionnaires were used to assess adolescents' sociodemographic  
20  
21 factors, fruit/vegetable (F/V) intake, and physical activity. Participants' weight, height, waist  
22  
23 circumference (WC), hip circumference (HC), and body fat percentage (%BF) were  
24  
25 measured, and waist to height ratio (WHtR), waist to hip ratio (WHR), and body mass index  
26  
27 (BMI) were calculated. Overweight/obesity was determined by BMI  $\geq$ 85th percentile for  
28  
29 age), abdominal obesity (AO) (WC, WHtR, and WHR) and %BF.

30  
31 **Results** A total of 34.7% of participants were overweight/obese (BMI  $\geq$ 85th percentile) and  
32  
33 378 (40.6%) had high %BF. AO was noted in 47.3%, 22.7%, and 27.1% of participants,  
34  
35 based on WC, WHR, and WHtR respectively. Significantly more participants from public  
36  
37 schools were overweight/obese (37.8% vs. 31.1%) and had greater AO (based on WC, WHR,  
38  
39 WHtR) compared with those from private schools. Predictors of obesity based on BMI were:  
40  
41 consuming  $<$ 5 servings of F/V (adjusted odds ratio [AOR] 2.41, 95% confidence interval  
42  
43 [CI]: 1.73, 3.36), being physically inactive (AOR 2.09, CI: 1.36, 3.22), and being male (AOR  
44  
45 3.35, 95% CI: 2.20, 5.10). Predictors of AO were being male (WC: AOR 1.42, 95% CI: 1.01,  
46  
47 2.00; WHtR: AOR 2.72, 95% CI: 1.81, 4.08); studying at public school (WHR: AOR 1.67,  
48  
49 95% CI: 1.06, 2.66); being Emirati (WHR: AOR 0.62, 95% CI: 0.43, 0.90); consuming  $<$ 5  
50  
51  
52  
53  
54  
55  
56  
57  
58  
59  
60

1  
2  
3 servings of F/V (WC: AOR 1.71, 95% CI: 1.27, 2.30; WHtR: AOR 1.46, 95% CI: 1.05,  
4  
5 2.03), and being physically inactive (WC: AOR 1.63; 95% CI: 1.13, 2.35).  
6  
7

8 **Conclusions** Focused interventions are needed to combat obesity while considering AO  
9  
10 indicators and BMI to diagnose obesity in adolescents.  
11

12 **Keywords:** Adolescents, obesity, body mass index, abdominal obesity, body fat percentage,  
13  
14 public schools, private schools, fruit and vegetable intake, physical activity.  
15  
16  
17  
18  
19  
20  
21  
22  
23  
24  
25  
26  
27  
28  
29  
30  
31  
32  
33  
34  
35  
36  
37  
38  
39  
40  
41  
42  
43  
44  
45  
46  
47  
48  
49  
50  
51  
52  
53  
54  
55  
56  
57  
58  
59  
60

For peer review only

### Strengths and limitations of this study

- This study examined prevalence and determinants of obesity using different obesity indices (body mass index, abdominal obesity, and body fat percentage) in a representative sample of adolescents from private and public schools.
- This study used a cross-sectional design; therefore, causality cannot be assumed.
- In addition, we cannot rule out the potential effect of confounding factors that may influence obesity outcomes, such as participants' genetic composition, school dietary practices/policies, social factors, and participants' full dietary intake.

For peer review only

## INTRODUCTION

Adolescence is a transitional developmental period characterized by changes in physical, intellectual, social, and emotional health. Optimal growth during adolescence is important for maintaining good health throughout the life course. Obesity among adolescents is a serious health problem and public health issue that demands urgent attention.<sup>1</sup> Globally, the prevalence of overweight/obesity has increased among children and adolescents. For example, the global prevalence was 4% in 1975, whereas the 2016 estimate was over 18%; this increase was similar among boys and girls (19% and 18%, respectively).<sup>2</sup> Increasing overweight and obesity rates are important public health issues for Middle Eastern and North African countries, especially as rapid increases in obesity have been observed among children and adolescents.<sup>3</sup> A large-scale epidemiological study ( $n=44,942$ ) conducted in Ras Al Khaimah, United Arab Emirates (UAE), confirmed obesity was steadily increasing in those aged 3–18 years; each year an additional 2.36% were classified as obese and 0.28% as extremely obese.<sup>4</sup> In 2014, a global action plan that aimed to prevent and control noncommunicable diseases was adopted by the World Health Assembly.<sup>1</sup> This action plan highlighted the importance of measures to address obesity rates globally, including among children and adolescents. Many countries have reflected the need to focus on reducing and preventing obesity among young people in national policies and strategies; for example, the UAE included obesity among children as an indicator in the Vision 2021 National Agenda.<sup>5</sup>

In addition to causing health problems in childhood and adolescence, overweight and obesity among young people can have long-term health impacts into adulthood (e.g., cardiovascular disease, insulin resistance, type 2 diabetes mellitus, psychosocial complications).<sup>6</sup> Childhood obesity can also predict obesity in adulthood. A long-term follow-up study indicated efforts to influence body mass index (BMI) over the life course should begin early (e.g., before age 6 years), and noted the progression toward a high BMI begins in adolescence for boys and young adulthood for girls.<sup>7 8</sup> These studies highlighted that early intervention is important to prevent increased BMI and associated health risks, which also contribute to increased healthcare expenditure.<sup>7 8</sup>

Various external factors that influence obesity have changed in recent years, such as rapid changes in dietary practices (e.g., fast food, processed foods), extensive use of technology (e.g., the

1  
2  
3 Internet and mobile devices), and increasingly sedentary lifestyles. Such developments have been  
4 associated with high obesity rates among adolescents, especially in developing countries.<sup>9</sup> In  
5 particular, the rapid socioeconomic transition in Middle Eastern and North African countries has  
6 resulted in increased urbanization and drastic lifestyle changes, manifested in low physical activity  
7 and unhealthy dietary practices.<sup>3</sup> These factors combined with the growing fast food industry have led  
8 to various nutritional-related chronic conditions among adolescents, including obesity.<sup>9</sup>

9  
10  
11  
12  
13  
14  
15  
16 The UAE has also witnessed rapid economic development and corresponding changes in  
17 lifestyles, leading to a marked increase in obesity in children/adolescents. Recently, the Global  
18 School-based Student Health Survey reported the obesity prevalence in the UAE youth population  
19 (aged 13–15 years) was 16.2%.<sup>10</sup> Previous cross-sectional studies from different cities across the UAE  
20 have also shown increased rates of obesity in adolescents, with the reported prevalence ranging from  
21 18.9% in Abu Dhabi<sup>11</sup> to 35% in Dubai.<sup>12</sup>

22  
23  
24  
25  
26  
27  
28  
29  
30  
31  
32  
33  
34  
35  
36  
37  
38  
39  
40  
41  
42  
43  
44  
45  
46  
47  
48  
49  
50  
51  
52  
53  
54  
55  
56  
57  
58  
59  
60  
Given the increased prevalence of obesity, it is important to clarify factors that contribute to  
obesity. School type (e.g., public, private) may be a key determinant of obesity, as students spend  
much of their day in school. Previous studies investigated differences in obesity rates between public  
and private schools. For example, one study found that many students attending public schools were  
obese and had low physical activity, low fruits and vegetables (F/V) consumption, and low intakes of  
water, fiber, vitamins, and minerals.<sup>13</sup> Another study found that children attending public schools had  
a high BMI and a greater likelihood of being overweight compared with children attending private  
schools.<sup>14</sup> However, other studies have reported opposite trends. Studies conducted in different  
countries such as Pakistan, Kenya, and India, all reported private school students had higher rates of  
obesity compared with those attending public schools.<sup>15–17</sup> Another study conducted in Shanghai also  
reported more students at private schools were overweight compared with those at public schools.<sup>18</sup>  
That study noted that this difference may be explained by diet, socioeconomic status, school  
environment, and factors related to infancy.

Most previous studies that investigated the prevalence of obesity in the UAE did not consider  
school type and other potentially associated factors. The majority of available studies<sup>4 11 12</sup> only used  
BMI as indicator of obesity in school-aged adolescents and did not include other parameters such as

1  
2  
3 abdominal obesity (AO) indicators and body fat percentage (%BF). Relying on BMI only does not  
4 provide a realistic and comprehensive picture of obesity in adolescents.<sup>1 2</sup> By mapping and rigorously  
5 assessing adolescents' obesity-related health status, healthcare providers, policymakers, schools, and  
6 families will be able to collaborate to develop appropriate evidence-based approaches to promote  
7 adolescent health.  
8  
9  
10  
11  
12

13  
14 This study explored the epidemiology of overweight and obesity in the adolescent population and  
15 compared obesity figures between private and public schools. We also aimed to determine factors that  
16 contributed to overweight and obesity in participants, using BMI, AO, and %BF indicators. Factors  
17 measured included sociodemographic data for age, gender, nationality, parents' level of education,  
18 employment (employed/unemployed), self-reported income (below average/average/above average),  
19 school type (public vs. private), and lifestyle factors (F/V intake, physical activity levels).  
20  
21  
22  
23  
24  
25

## 26 **SUBJECTS AND METHODS**

### 27 **Study design and setting**

28  
29 We adopted a quantitative correlational design. The sample was drawn from intermediate and high  
30 schools (secondary education) that were randomly selected from lists obtained from the Ministry of  
31 Education and other private/public school governing bodies in the UAE's seven emirates (Sharjah,  
32 Dubai, Abu Dhabi, Ajman, Ras Al Khaimah, Fujairah, and Umm Al Quwain). Recent statistics from  
33 the Ministry of Education (2018)<sup>19</sup> showed the UAE has fewer public schools than private schools  
34 (619 public vs. 643 private schools). Similarly, in terms of secondary schools (study population), the  
35 UAE has more private ( $n=257$ ) than public schools (128).<sup>19</sup> This study was reported according to the  
36 STROBE checklist for reports of cross-sectional studies (see Supplementary File 1).  
37  
38  
39  
40  
41  
42  
43  
44  
45  
46

### 47 **Participants and sampling**

48  
49 This study used one-stage cluster sampling of private and public schools. To obtain a representative  
50 sample, a simple random sampling technique was used to select 10 schools from the public cluster and  
51 15 schools from the private cluster. Cluster sampling is cost effective and recommended when it is  
52 difficult to compile a sampling frame that includes all elements of the study population.<sup>20</sup>  
53  
54  
55  
56  
57

58 A convenience sample of classes from grades 9–12 was chosen by the principals of the selected  
59 schools based on students' availability. All students in those classes were invited to participate in this  
60

1  
2  
3 study. Convenience sampling was justifiable in our situation as it increased the cooperation of school  
4 principals and staff in data collection. The principal of each school provided access to classes  
5 depending on the class schedules, students' availability, and willingness of school personnel to  
6 facilitate data collection. Furthermore, selected schools requested that data collection procedures did  
7 not interrupt the planned educational activities which were set at the beginning of the academic year  
8 (e.g., exams' schedules, physical activity classes, and other extra-curricular activities).  
9

10  
11  
12  
13  
14  
15  
16 The sample included male and female students from grades 9–12 in private and public schools  
17 (aged 13–19 years) of any nationality whose parents provided consent for them to participate. We  
18 excluded students with chronic diseases (e.g., type 2 diabetes, cancer, and mental health conditions)  
19 based on information from students' school records. This was because management of chronic  
20 diseases requires following special lifestyles and dietary practices that may affect the study's  
21 anthropometric measurements (Figure 1: Flow diagram of data collection process and  
22 analysis).  
23  
24  
25  
26  
27  
28  
29

30  
31 We used a standard sample size estimation method to obtain the sample size for a proportion  
32 data.<sup>21</sup> Based on an overweight/obesity prevalence of 40% among UAE adolescents,<sup>4</sup> a 3% margin of  
33 error, 95% confidence interval (CI), and a significance level of 0.05 (two tailed),<sup>21</sup> a total of 1024  
34 participants was needed. The 40% obesity prevalence rate used for this calculation was based on  
35 recent evidence of an increased prevalence of obesity in adolescents and rates reported in similar  
36 studies that included large populations of UAE school-aged adolescents from all nationalities, which  
37 was similar to our population.<sup>4 11 12</sup> An additional 100 participants were included to allow for non-  
38 responses and control for the design effect associated with cluster sampling, where less precise  
39 information is anticipated because people in a cluster tend to be more alike.<sup>20</sup> The larger sample size  
40 also increased precision during multiple comparisons in the statistical analyses and aided in  
41 controlling for possible confounding variables.<sup>21</sup>  
42  
43  
44  
45  
46  
47  
48  
49  
50  
51  
52  
53

#### 54 **Data collection**

55  
56 Figure 1 presents a flowchart of the data collection process. Participating students completed a self-  
57 report questionnaire that included questions about sociodemographic characteristics, F/V intake, and  
58  
59  
60

1  
2  
3 physical activity. This was followed by collection of anthropometric measurements. Trained research  
4 assistants administered the questionnaire in the selected classrooms. Participating students were then  
5 directed to the on-site school clinic where anthropometric measurements were taken by the research  
6 team using standardized techniques. The same research team administered the questionnaire and took  
7 the anthropometric measurements to maintain consistency and uniformity in the data collection  
8 process across different sites. Data were collected from September 2018 to May 2019, which was a  
9 regular school period excluding the summer holiday. In the UAE, there are no large seasonal  
10 variations during this part of the year and the temperature falls within an acceptable range; therefore,  
11 we anticipated no seasonal differences in anthropometric measurements.  
12  
13  
14  
15  
16  
17  
18  
19  
20  
21

## 22 **Measurements**

23  
24 The self-reported questionnaire included sociodemographic data (age, gender, nationality, and type of  
25 school (private vs. public), parents' level of education, employment (employed/unemployed), and  
26 self-reported income (below average/average/above average).  
27  
28  
29

### 30 ***Physical activity***

31  
32 Participants' physical activity was recorded using the Physical Activity Questionnaire for Adolescents  
33 (PAQ-A). This tool is a 7-day recall self-report questionnaire with nine-items.<sup>22</sup> The PAQ-A was  
34 originally developed to evaluate physical activity levels among high school students (aged 14 to 19  
35 years). Responses are on a 5-point Likert-scale, and the nine items are summed to give a total physical  
36 activity score. A high mean score indicates a high level of physical activity, and a cutoff score <2.75  
37 is considered inactive. The English version of the PAQ-A has high reliability (Cronbach's alpha: 0.77  
38 to 0.88) and high concurrent validity.<sup>23</sup> The Arabic version of the scale demonstrated good reliability  
39 and validity parameters when used in Arabic children and adolescents.<sup>24</sup> The estimated completion  
40 time for the PAQ-A is 20 minutes.<sup>23</sup>  
41  
42  
43  
44  
45  
46  
47  
48  
49  
50

### 51 ***F/V intake***

52  
53 F/V intake was assessed using the National Cancer Institute (NCI) Fruit and Vegetable Screener.<sup>25</sup>  
54 This instrument covers the frequency/amount consumed of specific items. These include: 100% fruit  
55 juice, fruit (e.g., fresh, canned, frozen), fried potatoes (e.g., French fries), other potatoes, dried beans,  
56 other vegetables, and tomato-based sauces (e.g., pasta, pizza). The instrument also evaluates the  
57  
58  
59  
60



1  
2  
3 frequency of consumption of vegetable combinations (e.g., sandwiches, salads, casseroles/stews, stir-  
4 fries). We calculated servings per day using NCI standard scoring algorithms.<sup>26</sup> The English version  
5 of the NCI has been reported to have excellent reliability and validity in both adults and adolescents.<sup>27</sup>  
6  
7 The scale also had acceptable reliability (Cronbach's alpha: 0.82) and predictive validity among Saudi  
8  
9 young adults.<sup>27</sup> A F/V intake of <5 servings was considered a low intake.  
10  
11

### 12 ***Obesity-related anthropometric measurements and indices***

13  
14 Anthropometric indices included height (cm), weight (kg), waist and hip circumferences (WC and  
15  
16 HC, respectively), waist to hip ratio (WHR), waist to height ratio (WHtR), and %BF. For these  
17  
18 measurements, students removed their shoes and wore minimal light-weight clothing as per World  
19  
20 Health Organization (WHO) guidelines.<sup>28</sup> Participants' height (to the nearest 0.1 cm) and weight (to  
21  
22 the nearest 0.1 kg) were measured using a telescopic measuring rod (Seca 220) for column scales.  
23  
24 Two measurements for WC and HC were recorded for each participant using an inextensible  
25  
26 anthropometric tape (Seca 201). These measurements were taken while participants stood erect with  
27  
28 their arms by their sides and feet close together.  
29  
30  
31

32  
33 Abdominal obesity (AO) indices included: WC, WHtR, and WHR. For WC, a cutoff of above the  
34  
35 90th percentile for age indicated AO.<sup>28</sup> Participants' WHtR was calculated by dividing their WC by  
36  
37 height, and a cutoff value of 0.5 was used to define AO.<sup>28 29</sup> WHR was calculated by dividing the WC  
38  
39 by HC (WHO, 2008), with a cutoff of value of 0.85 used to define AO.<sup>28</sup> BMI (weight in kg divided  
40  
41 by height in m<sup>2</sup>) was calculated and classified according to WHO criteria: underweight = BMI <3rd  
42  
43 percentile; normal weight = BMI between the 3rd and 85th percentiles; overweight = BMI between  
44  
45 the 85th and 97th percentiles; and obesity = BMI >97th percentile.<sup>30</sup>  
46

47  
48 A BMI at or above the 85th percentile for adolescents was adopted to classify participants as  
49  
50 either overweight/obese or underweight/normal, as this was widely used in similar epidemiological  
51  
52 studies<sup>4 11 12</sup> and recommended by international organizations (e.g., WHO, Centers for Disease  
53  
54 Control, and International Obesity Taskforce) to define obesity.<sup>30 31 32</sup> However, because there are  
55  
56 clinical limitations in using BMI to estimate obesity in adolescent populations and the lack of a gold  
57  
58 standard to define obesity,<sup>33</sup> we also reported other obesity indices including AO indicators (WC,  
59  
60

1  
2  
3 WHtR, WHR) and %BF. This combination was critical to provide valid and reliable obesity estimates  
4  
5 in our adolescent population.  
6

7 Participants' %BF was measured using the Body Composition Analyzer (TANITA MC 780  
8 multi-frequency segmental body composition analyzer). This device measured participants' body  
9 composition parameters by evaluating differences in impedance of body components (e.g., muscle and  
10 lean tissue).<sup>34</sup> Various body composition parameters are automatically calculated, including total body  
11 muscle and fat mass, total body water, total body fat and water ratios, muscle mass of the arms/legs,  
12 BMI, and basal metabolic rate. This technology has been shown to be valid and reliable.<sup>34 35</sup>  
13 Standardized %BF cutoff ratios were used with 25% for boys and 30% for girls.<sup>36</sup>  
14  
15  
16  
17  
18  
19  
20  
21

## 22 **Data analysis**

23  
24 We used RStudio Desktop 1.3.1093 for all statistical analyses, including mixed-effects logistic  
25 regression. Descriptive characteristics were calculated (frequency, percentage, mean, and standard  
26 deviation). Next, we compared differences in categorical sociodemographic variables by school type  
27 (private vs. public) using chi-square tests.  
28  
29  
30  
31

32 To address the clustering within schools, simple and multiple mixed-effects logistic regression  
33 analyses were conducted. The model included the random effect of schools using R package "lme4"<sup>37</sup>  
34 to determine the factors that predict obesity indicators (BMI, AO, and %BF). The factors that were  
35 assessed were sociodemographic variables, school type, physical activity, and F/V intake. Variables  
36 with a  $p$ -value  $\leq 0.20$  in the simple regression analysis were included in the multivariate regression  
37 model (gender, nationality, school type, F/V intake, and physical activity). Results of the mixed-  
38 effects multiple logistic regression models were expressed as odds ratios (ORs) with 95% CIs, and  $p$ -  
39 values less than 0.05 (two-sided) were considered statistically significant.  
40  
41  
42  
43  
44  
45  
46  
47  
48

## 49 **Ethics**

50  
51 Ethical approval to conduct this study was obtained from the University of Sharjah/Research Ethics  
52 Committee (REC/15/12/10) and the UAE Ministry of Health and Prevention (MOHAP REC-11).  
53  
54 Parental consent was obtained for each student that agreed to participate.  
55  
56  
57  
58  
59  
60

## RESULTS

### Participants' characteristics and obesity-related indices

Table 1 presents participants' characteristics. Of the 1124 adolescents who were recruited and met the inclusion criteria, 932 participants had complete data (82.9% response rate): 434 (46.6%) attended private schools and 498 (53.4%) attended public schools. Participants who had missing and incomplete data were eliminated from the analyses. The most common reason for not participating was lack of interest in this study.

Participants' average age was  $15.8 \pm 1.43$  years; 311 (33.4%) were males and 621 (66.6%) were females. The majority of the participants were UAE nationals (61.1%). More than two-thirds of participants' mothers were not employed ( $n=682$ , 73.2%) and the majority (60%) had an average family income (based on participants' self-report). Participants' mean F/V score was  $3.1 \pm 1.83$ , with 504 (54.1%) reported having  $<5$  F/V servings. The mean physical activity score was  $2.3 \pm 0.71$ ; 79.7% of participants were classified as inactive.

The prevalence rate of overweight/obesity was 34.7% ( $n=323$ ) (BMI  $\geq$ 85th percentile), and rates for AO were 47.3%, 22.7%, and 27.1% as evaluated by WC, WHR, and WHtR, respectively. Moreover, 378 (40.6%) participants had excess body fat as estimated by %BF using TANITA (M=27.6%, 12.0%) (Table 1).

**Table 1. Characteristics of participating adolescents ( $n=932$ )**

| Characteristics  | Frequency (%) or mean $\pm$ SD |
|------------------|--------------------------------|
| Gender           |                                |
| Male             | 311 (33.4)                     |
| Female           | 621 (66.6)                     |
| Age (years)      | $15.8 \pm 1.4$                 |
| Nationality      |                                |
| UAE National     | 569 (61.1)                     |
| Non-UAE National | 363 (38.9)                     |
| Type of school   |                                |
| Public           | 498 (53.4)                     |
| Private          | 434 (46.6)                     |

|    |                                |            |
|----|--------------------------------|------------|
| 1  |                                |            |
| 2  |                                |            |
| 3  | Mother's employment            |            |
| 4  |                                |            |
| 5  | Employed                       | 250 (26.8) |
| 6  |                                |            |
| 7  | Unemployed                     | 682 (73.2) |
| 8  |                                |            |
| 9  | Economic status                |            |
| 10 |                                |            |
| 11 | Below average                  | 32 (3.4)   |
| 12 | Average                        | 559 (60)   |
| 13 |                                |            |
| 14 | Above average                  | 341 (36.6) |
| 15 |                                |            |
| 16 | F/V score                      | 3.1±1.8    |
| 17 |                                |            |
| 18 | ≥5 servings                    | 428 (45.9) |
| 19 | <5 servings                    | 504 (54.1) |
| 20 |                                |            |
| 21 | PAQ-A                          | 2.3±0.7    |
| 22 |                                |            |
| 23 | Active (mean score ≥2.75)      | 189 (20.3) |
| 24 | Inactive (mean score <2.75)    | 743 (79.7) |
| 25 |                                |            |
| 26 | BMI (kg/m <sup>2</sup> )       | 61.8±33.0  |
| 27 |                                |            |
| 28 | Underweight                    | 79 (8.4)   |
| 29 | Normal                         | 530 (56.9) |
| 30 | Overweight                     | 158 (17.0) |
| 31 |                                |            |
| 32 | Obese                          | 165 (17.7) |
| 33 |                                |            |
| 34 | WC (cm)                        | 76.8±13.3  |
| 35 |                                |            |
| 36 | Normal                         | 491 (52.7) |
| 37 | Abdominal obesity              | 441 (47.3) |
| 38 |                                |            |
| 39 | WHR (cm)                       | 0.83±0.07  |
| 40 |                                |            |
| 41 | Normal                         | 720 (77.3) |
| 42 | Abdominal obesity              | 212 (22.7) |
| 43 |                                |            |
| 44 | WHtR (cm)                      | 0.47±0.08  |
| 45 |                                |            |
| 46 | Normal                         | 679 (72.9) |
| 47 | Abdominal obesity              | 253 (27.1) |
| 48 |                                |            |
| 49 | %BF                            | 27.6 ±12.0 |
| 50 |                                |            |
| 51 | Normal                         | 554 (59.4) |
| 52 |                                |            |
| 53 | Above normal (excess body fat) | 378 (40.6) |

Abbreviations: SD, standard deviation; F/V, fruits and vegetables intake score; PAQ-A, Physical Activity Questionnaire-Adolescents; BMI, body mass index; WC, waist circumference; WHR, waist to hip ratio; WHtR, waist to height ratio; %BF, body fat percentage.

60

### Private versus public schools

Table 2 shows the associations between sociodemographic factors, lifestyle variables, and obesity-related indices by school type. Public schools had significantly more Emirati students compared with private schools that had more expatriate students ( $p=0.001$ ). In addition, significantly more participants from public schools had an average family income as compared to private schools (75.1% vs 38.5%). However, above average income was significantly more prevalent in private school (61%) as compared to public school (18.9%) ( $p=0.001$ ). There was no statistically significant difference in F/V score between participants from public and private schools, with more than half of the participants in each school group consuming <5 F/V servings per day (54.6% vs. 53.6%).

With regards to obesity indicators, significantly more participants attending public schools were overweight/obese (BMI  $\geq$ 85th percentile) compared with those from private schools (37.8% vs. 31.1%) ( $p=0.001$ ). Moreover, participants from public schools had significantly higher AO indicators than their counterparts from private schools, as estimated by WHtR ( $p=0.001$ ), WC ( $p=0.028$ ), and WHR ( $p=0.040$ ) (Table 2).

**Table 2. Comparisons between private and public schools ( $n=932$ )**

|                     | Public schools<br>n (%), mean $\pm$ SD<br>( $n=498$ , 53.4%) | Private schools<br>n (%), mean $\pm$ SD<br>( $n=434$ , 46.6%) | p-value <sup>a</sup> |
|---------------------|--------------------------------------------------------------|---------------------------------------------------------------|----------------------|
| Gender              |                                                              |                                                               | 0.694                |
| Male                | 169 (33.9)                                                   | 142 (32.7)                                                    |                      |
| Female              | 329 (66.1)                                                   | 292 (67.3)                                                    |                      |
| Nationality         |                                                              |                                                               | <0.001               |
| UAE National        | 407 (81.7)                                                   | 162 (37.3)                                                    |                      |
| Non-UAE National    | 91 (18.3)                                                    | 272 (62.7)                                                    |                      |
| Mother's employment |                                                              |                                                               | 0.123                |
| Employed            | 144 (28.9)                                                   | 106 (24.4)                                                    |                      |
| Unemployed          | 354 (71.1)                                                   | 328 (75.6)                                                    |                      |
| Economic status     |                                                              |                                                               | <0.001               |
| Below average       | 30 (6.0)                                                     | 2 (0.5)                                                       |                      |
| Average             | 374 (75.1)                                                   | 167 (38.5)                                                    |                      |

|    |                           |            |              |       |
|----|---------------------------|------------|--------------|-------|
| 1  |                           |            |              |       |
| 2  |                           |            |              |       |
| 3  | Above average             | 94 (18.9)  | 265 (61.0)   |       |
| 4  |                           |            |              |       |
| 5  | F/V score                 | 3.0±1.7    | 3.1±1.9      |       |
| 6  |                           |            |              |       |
| 7  | ≥5 servings               | 197 (45.4) | 231 (46.4)   | 0.761 |
| 8  |                           |            |              |       |
| 9  |                           |            |              |       |
| 10 |                           |            |              |       |
| 11 | <5 servings               | 237 (54.6) | 267 (53.6)   |       |
| 12 |                           |            |              |       |
| 13 |                           |            |              |       |
| 14 | PAQ-A score               | 2.2±0.70   | 2.2±0.6      |       |
| 15 |                           |            |              |       |
| 16 | Active                    | 403 (81)   | 340 (78.3)   | 0.320 |
| 17 |                           |            |              |       |
| 18 | Inactive                  | 95 (19)    | 94 (21.7)    |       |
| 19 |                           |            |              |       |
| 20 | BMI (kg/m <sup>2</sup> )  |            |              | 0.001 |
| 21 |                           |            |              |       |
| 22 | Underweight               | 44 (8.8)   | 35 (8.1)     |       |
| 23 |                           |            |              |       |
| 24 | Normal                    | 266 (53.4) | 264 (60.8)   |       |
| 25 |                           |            |              |       |
| 26 | Overweight                | 77 (15.5)  | 81 (18.7)    |       |
| 27 |                           |            |              |       |
| 28 | Obese                     | 111 (22.3) | 54 (12.4)    |       |
| 29 |                           |            |              |       |
| 30 | WC (cm)                   | 78.5 ±15.0 | 74.80 ± 11.0 | 0.028 |
| 31 |                           |            |              |       |
| 32 | Normal                    | 247 (49.6) | 247 (57.0)   |       |
| 33 |                           |            |              |       |
| 34 | Abdominal obesity         | 251 (50.4) | 187 (43.0)   |       |
| 35 |                           |            |              |       |
| 36 | WHR (cm)                  | 0.83±0.07  | 0.83±0.06    |       |
| 37 |                           |            |              |       |
| 38 | Normal                    | 372 (74.7) | 348 (80.2)   | 0.040 |
| 39 |                           |            |              |       |
| 40 | Abdominal obesity         | 126 (25.3) | 86 (19.8)    |       |
| 41 |                           |            |              |       |
| 42 | WHtR (cm)                 | 0.48±0.08  | 0.46±0.06    |       |
| 43 |                           |            |              |       |
| 44 | Normal                    | 333 (66.9) | 346 (79.7)   | 0.001 |
| 45 |                           |            |              |       |
| 46 | Abdominal obesity         | 165 (33.1) | 88 (20.3)    |       |
| 47 |                           |            |              |       |
| 48 | %BF                       | 27.6±10.4  | 25.3±8.9     | 0.510 |
| 49 |                           |            |              |       |
| 50 | Normal                    | 301 (60.4) | 253( 58.3)   |       |
| 51 |                           |            |              |       |
| 52 | Above normal (excess fat) | 197 (39.6) | 181 (41.7)   |       |

<sup>a</sup>P-values significant at <0.05 based on chi-square tests

Abbreviations: F/V, fruits and vegetables intake score; PAQ-A, Physical Activity Questionnaire-Adolescents; BMI, body mass index; WC, waist circumference; WHR, waist to hip ratio; WHtR, waist to height ratio; %BF, body fat percentage

### Predictors of overweight/obesity: BMI, AO, and %BF

Table 3 presents the results of the mixed-effects multiple logistic regression analysis with the random effect of schools. Predictors of being overweight/obese (based on BMI) were: being male (adjusted OR [AOR] 3.35, 95% CI: 2.20, 5.10), consuming <5 servings of F/V (AOR 2.41, 95% CI: 1.73, 3.36), and being physically inactive (AOR 2.09, CI: 1.36, 3.22).

Students in public schools had significantly higher odds of AO based on WHR than those in private schools (AOR 1.67, 95% CI: 1.06, 2.66). However, compared with expatriates, Emirati students were significantly less likely to have AO (WHR: AOR 0.62, 95% CI: 0.43, 0.90) and a high %BF (AOR 0.54, 95% CI: 0.30, 0.98). Male participants had a significantly higher odds of AO based on WC (AOR 1.42, 95% CI: 1.01, 2.00) and WHtR (AOR 2.72, 95% CI: 1.81, 4.08) compared with female participants. However, males had significantly lower odds of high %BF than females (AOR 0.19, 95% CI: 0.12, 0.33). Compared with  $\geq 5$  F/V servings per day, <5 F/V servings was associated with significantly higher odds of AO based on WC (AOR 1.71, 95% CI: 1.27, 2.30) and WHtR (AOR 1.46, 95% CI: 1.05, 2.03). Furthermore, participants who were physically inactive had a significantly higher odds of AO based on WC (AOR 1.63, 95% CI: 1.33, 2.35) compared with those who were physically active (Table 3).

**Table 3. Determinants of overweight/obesity based on body mass index, abdominal obesity indicators, and total body fat percentage using mixed-effects<sup>a</sup> multiple logistic regression (n=932)**

| Dependent variable ⇒    | BMI<br>Overweight/obese  | Elevated WC              | Elevated WHR             | Elevated WHtR            | High %BF                 |
|-------------------------|--------------------------|--------------------------|--------------------------|--------------------------|--------------------------|
| Independent variable ⇓  | AOR [95% CI]             | AOR [95% CI]             | AOR [95% CI]             | AOR [95% CI]             | AOR [95% CI]             |
| <b>Gender</b>           |                          |                          |                          |                          |                          |
| Female <sup>b</sup>     |                          |                          |                          |                          |                          |
| Male                    | <b>3.35 [2.20, 5.10]</b> | <b>1.42 [1.01, 2.00]</b> | 1.20 [0.85, 1.71]        | <b>2.72 [1.81, 4.08]</b> | <b>0.19 [0.12, 0.33]</b> |
| <b>School</b>           |                          |                          |                          |                          |                          |
| Private <sup>b</sup>    |                          |                          |                          |                          |                          |
| Public                  | 0.60 [0.19, 1.91]        | 1.07 [0.51, 2.26]        | <b>1.67 [1.06, 2.66]</b> | 1.34 [0.58, 3.09]        | 0.52 [0.01, 26.91]       |
| <b>Nationality</b>      |                          |                          |                          |                          |                          |
| Expatriate <sup>b</sup> |                          |                          |                          |                          |                          |
| Emirati                 | 1.19 [0.81, 1.75]        | 0.74 [0.52, 1.04]        | <b>0.62 [0.43, 0.90]</b> | 0.85 [0.57, 1.26]        | <b>0.54 [0.30, 0.98]</b> |
| <b>F/V serving</b>      |                          |                          |                          |                          |                          |

|                     |            |                          |                          |                   |                          |                   |
|---------------------|------------|--------------------------|--------------------------|-------------------|--------------------------|-------------------|
|                     | $\geq 5^b$ |                          |                          |                   |                          |                   |
|                     | <5         | <b>2.41 [1.73, 3.36]</b> | <b>1.71 [1.27, 2.30]</b> | 1.09 [0.79, 1.50] | <b>1.46 [1.05, 2.03]</b> | 1.27 [0.78, 2.09] |
| <b>PAQ-A</b>        |            |                          |                          |                   |                          |                   |
| Active <sup>b</sup> |            |                          |                          |                   |                          |                   |
| Inactive            |            | <b>2.09 [1.36, 3.22]</b> | <b>1.63 [1.13, 2.35]</b> | 0.99 [0.67, 1.48] | 1.41 [0.92, 2.17]        | 1.31 [0.76, 2.27] |

Abbreviations: AOR=adjusted odds ratio; CI=confidence interval; F/V=fruits and vegetables intake score; PAQ-A=Physical Activity Questionnaire-Adolescents; WC=waist circumference; WHR=waist to hip ratio; WHtR=waist to height ratio; %BF= percentage body fat.

<sup>a</sup>With the random effect of schools in the mixed-effects logistic regression; <sup>b</sup>Reference category. Numbers in bold are statistically significant ( $p<0.05$ ).

## DISCUSSION

This study presents new information regarding the epidemiology and determinants of overweight/obesity among UAE school-aged adolescents. We found a considerably high prevalence of overweight/obesity among participants (34.7%), which supported previous UAE-based epidemiological studies that used BMI to define obesity.<sup>4 11 12</sup> The prevalence rates of overweight/obesity observed in our study was also consistent with studies from other Arab countries that used BMI to classify obesity, including Saudi Arabia (39%),<sup>38</sup> Kuwait (44.3%),<sup>39</sup> Lebanon (32.2%),<sup>40</sup> and Egypt (35%).<sup>41</sup> Conversely, studies conducted in Western countries reported lower obesity rates compared with our study. For example, the obesity rate among adolescents in European countries was between 22%–25%, with the rate for Italy<sup>42</sup> being 23.3% (either overweight or obese) and rates for Greece being 19.1% (overweight) and 3.2% (obesity).<sup>43</sup> In the US, 30% of adolescents were overweight/obese.<sup>44</sup>

In the present study, we also investigated other obesity indicators using AO indices. A concerning finding in our study was that AO indicators were high (WC 47.4%, WHR 22.8%, and WHtR 27.2%). Visceral adiposity (as measured by WC, WHR, and WHtR) is associated with an increased risk for earlier onset of metabolic disorders, and obesity-related morbidity and mortality.<sup>3 8</sup> There are variations in the literature on indices and values used to define AO in adolescents. For example, El-Kassas and Ziade<sup>40</sup> reported central obesity rates as evaluated by WC (41.8%) and WHtR (38.3%), whereas Al Hazza et al.<sup>38</sup> reported abdominal obesity using WHtR (35.9% for adolescent males and 30.3% for females). Abolfotouh et al.<sup>41</sup> reported lower AO rates among Egyptian adolescents using WHR (16.1%), WC (4.5%), and WHtR (16.7%). These variations may be attributable to geographical



1  
2  
3 location, genetic compositions, and differing lifestyles, along with different cut-off values for  
4 interpreting AO results.  
5

6  
7 We found that the majority of the participating adolescents showed low physical activity levels  
8 (79.7%) and more than half (54.1%) had low F/V consumption (<5 servings). A recent study in UAE  
9 reported that only around 28% of Emirati adolescents had the recommended daily F/V intake.<sup>45</sup> As for  
10 the low levels of physical activity, our finding was consistent with a global estimate from the WHO  
11 that 81% of those aged 11–17 years did not meet daily physical activity recommendations.<sup>46</sup> It is  
12 noteworthy that physical inactivity and low F/V consumption in adolescence may persist throughout  
13 adulthood, which will increase the risk for chronic lifelong diseases later in life.<sup>45 46</sup>  
14  
15  
16  
17  
18  
19  
20  
21

### 22 **Obesity in public versus private schools**

23  
24 Interestingly, we found a higher prevalence of obesity in adolescents from public schools than among  
25 adolescents from private schools (as measured by BMI). Differences in obesity rates between private  
26 and public schools have been reported in different countries in studies that used BMI. Similar to our  
27 findings, a study examining obesity rates among students in Palermo reported more public school  
28 students were overweight/obese compared with private school students (age 13 years: 40.8% vs.  
29 34.5%; age 15 years: 36.7% vs. 30.2%).<sup>13</sup> However, other studies have reported contrasting findings.  
30 For example, a study in Kenya found that overweight/obesity rates were significantly higher (29.0%)  
31 among private school children than those from public schools (11.5%).<sup>16</sup> Similar trends of higher  
32 obesity rates in private schools compared with public schools were also observed in studies from  
33 India,<sup>17</sup> Pakistan,<sup>15</sup> and Saudi Arabia.<sup>38</sup> A possible explanation for the inconsistent findings related  
34 to obesity rates between private and public schools could be differences in sociodemographic,  
35 environmental and cultural factors of attending students. For example, in the UAE, public schools are  
36 mostly attended by Emirati/national students whereas private schools are mainly attended by  
37 expatriates.<sup>19</sup> Therefore, different eating habits among cultures could contribute to these findings.  
38 Furthermore, offering unhealthy items in vending machines, poor communication between food  
39 suppliers and school personnel, and limited physical activity facilities at schools may be correlated  
40 with body weight in adolescents.<sup>47</sup>  
41  
42  
43  
44  
45  
46  
47  
48  
49  
50  
51  
52  
53  
54  
55  
56  
57  
58  
59  
60

1  
2  
3 Similarly, in our study, public school students had significantly higher AO indicators (WC, WHR,  
4 WHtR) than private school students, which were consistent with our results for BMI values. Most  
5 previous UAE-based studies reported BMI rates and did not examine these obesity indicators.  
6  
7 Similarly, many other studies that compared private and public schools in various countries did not  
8 compare AO indicators.<sup>13 16 17 18</sup> Accordingly, our results align with the recommendation from several  
9 previous research suggesting that in addition to BMI, other anthropometric measurements should be  
10 included as indicators of obesity when screening adolescents in schools (e.g., WC, WHC, and  
11 WHtR).<sup>28 33</sup>

12  
13  
14  
15  
16  
17  
18  
19  
20 Interestingly, we found no significant difference between private and public schools in F/V  
21 consumption, with participants from both schools consuming less than the recommended number of  
22 daily F/V servings. This finding was inconsistent with previous comparative studies in which  
23 participants from public schools were found to consume less F/V compared with participants from  
24 private schools. For example, a school-based study from Ethiopia reported private school adolescents  
25 consumed significantly more F/V compared with their public school counterparts.<sup>48</sup> Similarly, a  
26 Brazilian study among school children aged 10–12 years (151 from public schools, 55 from private  
27 schools) showed public school participants had less F/V consumption than those from private  
28 schools.<sup>49</sup> A recent mixed methods study from the UAE in which the majority of the sample was from  
29 public schools (24 public, 10 private) reported that only 28% of participants ( $n=620$ ) met the WHO  
30 recommended daily F/V intake.<sup>45</sup>

31  
32  
33  
34  
35  
36  
37  
38  
39  
40  
41  
42  
43 Low consumption of F/V among school-aged adolescents is a common problem in different  
44 regions around the world.<sup>46</sup> Despite governmental guidance regarding adoption of a unified school  
45 nutritional policy across all schools in the UAE, there is no mechanism to encourage students to  
46 increase F/V consumption, and no monitoring mechanism to control types of food offered at school  
47 canteens. Examining environmental factors in both private and public schools (e.g., types of snacks,  
48 beverages, and content of students' lunch boxes) is recommended to better understand factors that  
49 contribute to the low F/V consumption among adolescents.

50  
51  
52  
53  
54  
55  
56  
57  
58 In our study, variations were noted in sociodemographic factors, nationality, and economic status  
59 between participants from private and public schools. These personal factors could play an important  
60

1  
2  
3 role in determining obesity rates in adolescents,<sup>42 45 50</sup> and therefore warrant further attention.

4  
5 Understanding the differences between private and public schools and the sociodemographic structure  
6  
7 among adolescents is essential to build focused interventions that overcome barriers to healthy  
8  
9 choices, especially in public schools that demonstrated increased obesity rate.

### 11 **Determinants of obesity in participants**

12  
13 Physical activity and F/V intake were significant determinants of overweight/obesity, and showed  
14  
15 independent relationships with different obesity indicators including BMI and AO (WC) after  
16  
17 adjustment for all other variables in the model. Other studies have also shown that low levels of  
18  
19 physical activity and unhealthy dietary practices predicted obesity among adolescents.<sup>5</sup> Rapid  
20  
21 urbanization and lifestyle changes in the UAE have increased exposure to fast/processed foods,  
22  
23 sedentary lifestyle along with reduced F/V consumption and less physical activity.<sup>3 13 17</sup> Adolescents  
24  
25 tend to spend most of their time playing computer games, doing homework and similar activities  
26  
27 instead of spending time on exercise and sports.<sup>45</sup> Therefore, promoting healthy lifestyles for  
28  
29 adolescents is a public health priority as the WHO recommends at least 60 minutes of moderate-to-  
30  
31 vigorous physical activity each day, and a dietary intake of at least 400 grams of F/V each day  
32  
33 (roughly equivalent to five servings of F/V per day).<sup>51</sup> Therefore, there is a need to enforce school  
34  
35 policies that motivate adolescents to consume the recommended intake of F/V and engage in physical  
36  
37 activities for better health outcomes. In the school environment, guidelines for food consumption  
38  
39 inside schools, canteen food menus, and diet and exercise self-efficacy must be explored in future  
40  
41 studies.<sup>5 45</sup>

42  
43  
44  
45 Considering gender differences should also be highlighted, as male participants in our study were  
46  
47 more likely to have higher BMI and AO (above normal WC and WHtR) and less likely to have high  
48  
49 %BF compared with female participants. These findings were consistent with previous studies.<sup>52, 53</sup>  
50  
51 For example, significantly higher AO (measured by WHR and WC) was reported in adolescent boys  
52  
53 compared with girls in Poland.<sup>52</sup> A cross sectional, school-based study from China involving 830 boys  
54  
55 and 796 girls aged 7–16 years showed that more boys were obese (based on BMI: 15.2% vs. 6.9%)  
56  
57 and boys had more central obesity (based on WC: 27.4% vs. 11.7%) compared with girls.<sup>53</sup> Similarly,  
58  
59  
60

1  
2  
3 a study from Brazil involving adolescents from private and public schools showed boys had  
4 significantly higher BMI and AO (measured by WC) than girls.<sup>54</sup> Focused nutritional and physical  
5 activity programs that reflect differences in lifestyles and perceptions of overweight and obesity  
6 among male adolescents are needed to promote better health outcomes.<sup>53</sup> Addressing this issue should  
7 involve multiple approaches targeting behavior change (e.g., food labeling, planning “exercise-  
8 friendly” cities).

9  
10 Consistent with previous findings,<sup>14</sup> our study showed adolescents in public schools were  
11 more likely to have AO (based on WHR) compared with those in private schools. AO has been  
12 associated with visceral fat mass, higher blood pressure, and cardiovascular risk factor clustering, and  
13 should be measured along with BMI.<sup>53 54</sup> Among adolescents in Poland (141 boys and 168 girls aged  
14 16–18 years), AO (WC, WHR, WHtR) was associated with family environment and modifiable  
15 lifestyle factors.<sup>52</sup> In our study, school type predicted WHR but not other important obesity indicators  
16 (e.g., BMI), AO indicators (WC, WHtR), and %BF. Therefore, our results regarding the effect of  
17 school type on obesity should be interpreted with caution. It is necessary to further investigate school  
18 environmental factors that could affect obesity in adolescents that consider obesity indicators in  
19 addition to BMI (e.g., AO and %BF). Unlike many other countries, adolescents in the UAE come  
20 from diverse ethnic backgrounds; therefore, it is essential to investigate the possible contributions of  
21 lifestyle factors and parental and cultural practices to obesity.

22  
23 In our study, being Emirati was associated with lower odds of AO (based on WHR) and high  
24 %BF compared with expatriates after adjusting for all other factors. These results need further  
25 verification as we did not collect information on participants’ genetic composition, which could  
26 explain the differences observed between Emirati and non-Emirati adolescents who have diverse  
27 ethnic backgrounds. Such an investigation could also include all obesity indicators that were  
28 considered in this study (BMI, AO, %BF). This comprehensive research could provide evidence to  
29 support policy makers in their efforts to develop targeted interventions to combat the impact of  
30 obesity and its sequelae on health and well-being among adolescents.

31  
32 The results from the present study concerning the high obesity prevalence and its determinants  
33 confirm the need for a strong and unified policy that considers students’ diverse sociodemographic

1  
2  
3 characteristics, school type and environment, and educational policies when initiating campaigns to  
4 combat obesity. Government health campaign interventions and strategies must be established at the  
5 federal level to support schools to identify overweight and obese adolescents and increase their  
6 awareness about the negative impact of obesity on health outcomes in adolescents.<sup>5 45</sup> A unified and  
7 collaborative health promotion model is needed where UAE health officials, teachers, parents,  
8 students, and social media are involved as early as possible.<sup>5 51 46</sup> Furthermore, it is recommended that  
9 a surveillance system for obesity indicators for UAE adolescents is implemented to monitor the  
10 effectiveness of policies aiming to counteract obesity in this population.  
11  
12  
13  
14  
15  
16  
17  
18  
19

### 20 **Strengths and limitations**

21  
22 Our study is among the first in the UAE to provide valid estimates of obesity by considering BMI, AO  
23 indicators, and %BF. This study highlights the urgent need to screen for obesity in our schools and  
24 emphasizes the importance of health promotion campaigns and practices, especially in public schools.  
25 Further, the present findings focus on the importance of considering F/V intake and physical activity  
26 among adolescents as important predictors of obesity, which can be used to inform the direction of  
27 public health policy geared toward improving lifestyle of adolescents.  
28  
29  
30  
31  
32  
33  
34

35 Many males in higher secondary education move to vocational and technical schools to build their  
36 skills, meaning fewer males stay in secondary schools.<sup>19</sup> This trend was reflected in this study where  
37 there were fewer male participants than female participants. This limits the generalizability of the  
38 study findings. Furthermore, we expected to recruit more adolescents from private schools we as  
39 invited more private schools to participate; however, fewer private school participants were recruited  
40 for this study. This might be attributable to limited access given by school administration to classes in  
41 the private schools cluster. Additional genetic, family, dietary pattern, stress, and social factors should  
42 be examined in future studies to provide a comprehensive picture of the determinants of obesity in  
43 adolescents.  
44  
45  
46  
47  
48  
49  
50  
51  
52  
53

54 Despite the use of multiple obesity indices in this study to provide a valid picture of obesity  
55 among the UAE adolescent population, we used international cutoff points to classify participants into  
56 overweight/obese and normal/underweight groups. Given the overwhelming health risks associated  
57  
58  
59  
60

1  
2  
3 with obesity in adolescents, there is an urgent need for a standardized definition of obesity in  
4 adolescents so that trends can be monitored and comparisons made between adolescents of different  
5 ethnic groups. Subsequently, established gold standards can be used to determine obese adolescents in  
6 clinical practice as well as in relevant epidemiological studies.  
7  
8  
9  
10

## 11 **CONCLUSIONS**

12  
13 Our study showed a high prevalence rate of overweight/obesity among school-aged adolescents in the  
14 UAE (as measured by BMI), which confirms that obesity remains a widespread problem in UAE  
15 schools. This study underscores the importance of early screening of AO indicators (WHtR, WC, and  
16 %BF) in the routine assessment of adolescents in addition to BMI, because AO is associated with high  
17 blood pressure, metabolic syndrome, and cardiometabolic risks. It is also necessary to promote  
18 healthier lifestyles (e.g., healthy eating by increasing F/V intake and increased physical activity)  
19 among children and adolescents to help curb obesity trends and prevent the development of chronic  
20 diseases. Additional studies are needed to observe the changes in obesity rates necessary to achieve  
21 the UAE Vision 2021 National Agenda of a world-class healthcare system by reducing the prevalence  
22 of obesity among children to support a healthy population in our schools.  
23  
24  
25  
26  
27  
28  
29  
30  
31  
32  
33

34 Finally, obesity in adolescents is multifactorial; therefore, further research is needed to examine  
35 the contributions of modifiable and non-modifiable risk factors to obesity among adolescents in  
36 different cultures. Future research should establish cutoff values for different obesity indicators to  
37 yield better screening and diagnosis of obesity among adolescents.  
38  
39  
40  
41  
42

43 **Acknowledgments** The authors would like to thank the Ministry of Education for facilitating the data  
44 collection process. Also, we would like to thank all schools' personnel and students for their time and  
45 effort during the data collection process. Finally, we would like to acknowledge the effort of research  
46 assistants in the data collection process.  
47  
48  
49  
50

51 **Contributors** WBI, HR, RR, RF, NA, AA, SE, SM, AF, and MA conceived of the presented idea.  
52 LN, WB, AA, RF, HR, MA involved in conducted the statistical analyses. LN, WBI, HR, RR, RF,  
53 NA, AA, SE, SM, LN, AF, and MA wrote the initial draft of the manuscript. WBI, HR, RF, AA, MA,  
54 LN contributed to writing the initial results and provided critical review of the manuscript.  
55  
56  
57  
58  
59  
60

1  
2  
3 **Funding Statement** This research was funded by the University of Sharjah/Research Institute for  
4 Medical and Health Sciences\Health Promotion Research Group (Grant number 150310).  
5

6  
7 **Disclaimer** The funding body was not involved in the design of the study nor the collection, analysis,  
8 and, interpretation of data and writing of the manuscript.  
9

10  
11 **Competing interests** None declared.  
12

13  
14 **Patient and public involvement** Patients and/or the public were not involved in the design, or  
15 conduct, or reporting, or dissemination plans of this research.  
16

17  
18 **Patient consent for publication** Not required.  
19

20  
21 **Ethical Considerations** Ethical approval to conduct this study was obtained from the Research Ethics  
22 Committee of the principal investigator's institution, the UAE Ministry of Health and Prevention, and  
23 the UAE Ministry of Education. Parental consent was obtained for each student that agreed to  
24 participate in this study.  
25  
26  
27

28  
29 **Provenance and peer review** Not commissioned; externally peer reviewed.  
30

31  
32 **Data availability statement** The datasets used and analyzed during the present study are available  
33 from the corresponding author on reasonable request.  
34  
35  
36  
37  
38  
39  
40  
41  
42  
43  
44  
45  
46  
47  
48  
49  
50  
51  
52  
53  
54  
55  
56  
57  
58  
59  
60

## REFERENCES

1. World Health Organization. Facts and figures on childhood obesity. Available: <https://www.who.int/end-childhood-obesity/facts/en/>. [Accessed August 8 2019].
2. World Health Organization. Obesity and overweight (2018). Available: <https://www.who.int/news-room/fact-sheets/detail/obesity-and-overweight>. [Accessed August 8 2019].
3. Farrag NS, Cheskin LJ, Farag MK. A systematic review of childhood obesity in the Middle East and North Africa (MENA) region: Health impact and management. *Adv Pediatr Res*. 2017; **4**:6. doi:10.12715/apr.2017.4.8 PMID:29354689.
4. AlBlooshi A, Shaban S, AlTunaiji M, Fares N, AlShehhi L, AlShehhi H, et al. Increasing obesity rates in school children in United Arab Emirates. *Obesity Science & Practice*. 2016;**2**(2):196-202. doi: 10.1002/osp4.37 PMID: <https://www.ncbi.nlm.nih.gov/pmc/articles/PMC5773115/>
5. Moonesar IA, Hickman CJL. How the UAE can reduce the prevalence of obesity among the youth? - A health policy perspective. *Advances in Obesity, Weight Management & Control*. 2017;**6**(2):64-68. doi:10.15406/aowmc.2017.06.00150
6. Barton M. Childhood obesity: a life-long health risk. *Acta Pharmacol Sin*. 2012;**33**(2):189-193. doi: 10.1038/aps.2011.204 PMID: <https://www.ncbi.nlm.nih.gov/pmc/articles/PMC4010330/>
7. Simmonds M, Llewellyn A, Owen CG, Woolacott N. Predicting adult obesity from childhood obesity: a systematic review and meta-analysis. *Obes Rev*. 2015;**17**(2):95-107. doi: 10.1111/obr.12334 PMID: <https://pubmed.ncbi.nlm.nih.gov/26696565/>
8. Buscot MJ, Thomson RJ, Juonala M, Sabin MA, Burgner DP, Lehtimäki T, et al. BMI trajectories associated with resolution of elevated youth BMI and incident adult obesity.



- 1  
2  
3 *Pediatr.* 2018;**141**(1):e20172003. doi: 10.1542/peds.2017-2003PMID:  
4  
5 <https://pubmed.ncbi.nlm.nih.gov/29259077/>  
6  
7  
8 9. Al Amiri E, Abdullatif M, Abdulle A, Al Bitar N, Afandi EZ, Parish M, et al. The  
9  
10 prevalence, risk factors, and screening measure for prediabetes and diabetes among  
11  
12 Emirati overweight/obese children and adolescents. *BMC Public Health.* 2015;**15**:1298.  
13  
14 doi: 10.1186/s12889-015-2649-6.PMID:<https://europepmc.org/article/PMC/4690431>  
15  
16  
17 10. Global School-based Student Health Survey. United Arab Emirates 2016 Fact Sheet.  
18  
19 Available:[https://www.who.int/ncds/surveillance/gshs/UAE-2016-gshs-fact-](https://www.who.int/ncds/surveillance/gshs/UAE-2016-gshs-fact-sheet.pdf?ua=1)  
20  
21 [sheet.pdf?ua=1](https://www.who.int/ncds/surveillance/gshs/UAE-2016-gshs-fact-sheet.pdf?ua=1). [Accessed August 8, 2019].  
22  
23  
24 11. Al Junaibi A, Abdulle A, Sabri S, Hag-Ali M, Nagelkerke N. The prevalence and  
25  
26 potential determinants of obesity among school children and adolescents in Abu Dhabi,  
27  
28 United Arab Emirates. *Int J Obes (Lond).* 2013;**37**(1):68-74. doi:  
29  
30 10.1038/ijo.2012.131PMID: <https://pubmed.ncbi.nlm.nih.gov/22890490/>  
31  
32  
33 12. Bin Zaal AA, Musaiger AO, D'Souza R. Dietary habits associated with obesity among  
34  
35 adolescents in Dubai, United Arab Emirates. *Nutr Hosp.* 2009;**24**(4):437-444. doi:  
36  
37 10.1177/156482651303400102PMID: <https://pubmed.ncbi.nlm.nih.gov/19721923/>  
38  
39  
40 13. Provenzano S, Santangelo OE, Catalano R, Marchese V, Bonanno V, La Placa S, et al.  
41  
42 Determinants associated with obesity and physical activity in the public and private  
43  
44 schools of the city of Palermo. *Acta Med Mediterr.* 2018;**34**(2):443-448.  
45  
46 doi:[http://dx.doi.org/10.19193/0393-6384\\_2018\\_2\\_70](http://dx.doi.org/10.19193/0393-6384_2018_2_70)PMID:  
47  
48 <https://iris.unipa.it/handle/10447/366645#.X3B1W2gzY2w>  
49  
50  
51 14. Li J, Hooker NH. Childhood obesity and schools: Evidence from the National Survey of  
52  
53 Children's Health. *J School Health.* 2010;**80**(2):96-103. doi: 10.1111/j.1746-  
54  
55 1561.2009.00471.xPMID: <https://pubmed.ncbi.nlm.nih.gov/20236408/>  
56  
57  
58  
59  
60

- 1  
2  
3 15. Mansoori N, Nisar N, Shahid N, Mubeen SM, Ahsan S. Prevalence of obesity and its risk  
4 factors among school children in Karachi, Pakistan. *Trop Doct.* 2018;**48**(4):266-9.  
5  
6 [https://doi.org/10.1177/0049475518786664PMID:](https://doi.org/10.1177/0049475518786664PMID)  
7  
8 <https://pubmed.ncbi.nlm.nih.gov/30020028/>  
9  
10  
11  
12 16. Kyallo F, Makokha A, Mwangi AM. Overweight and obesity among public and private  
13 primary school children in Nairobi, Kenya. *Health.* 2013;**5**(8):85.  
14  
15 doi:10.4236/health.2013.58A3012  
16  
17  
18 17. Sangwan D. A study of body mass index between private and government school  
19 children. *Int. J. Phys. Educ. Sports Health.* 2016;**3**(1):63-65.  
20  
21  
22  
23 18. Shi J, Tan D, Xie H, Yang B, Liu R, Yu D, et al. Unequal distribution of overweight  
24 adolescents in immigrant-rich areas: Analysis of disparities among public and private  
25 school students in Shanghai, China. *Int J Environ Res Public Health.* 2017;**14**:252. doi:  
26 10.3390/ijerph14030252PMID: 28257123  
27  
28  
29  
30  
31  
32 19. Ministry of Education. United Arab Emirates. Available:  
33 <https://www.moe.gov.ae/Ar/OpenData/Documents/2017-2018.pdf>. [Accessed 27 July  
34 2020].  
35  
36  
37  
38  
39 20. Levy PS, Lemeshow S. *Sampling of populations: methods and applications*. John Wiley &  
40 Sons; 2013.  
41  
42  
43 21. Naing L, Winn T, Rusli BN. Practical issues in calculating the sample size for prevalence  
44 studies. *Archives of orofacial Sciences.* 2006;**1**:9-14.  
45  
46  
47  
48 22. Kowalski K, Crocker P, Donen R. The Physical Activity Questionnaire for Older  
49 Children (PAQ-C) and Adolescents (PAQ-A) manual. Saskatoon, Canada: University of  
50 Saskatchewan. 2004. Available:  
51 <https://www.ncbi.nlm.nih.gov/pmc/articles/PMC4323128/> [Accessed March 25 2019].  
52  
53  
54  
55  
56  
57  
58  
59  
60

- 1  
2  
3 23. Janz KF, Lutuchy EM, Wenthe P, Levy SM. Measuring activity in children and  
4  
5 adolescents using self-report: PAQ-C and PAQ-A. *Med Sci Sports Exerc.* 2008;**40**:767-  
6  
7 772. doi: 10.1249/MSS.0b013e3181620ed1PMID:  
8  
9 <https://pubmed.ncbi.nlm.nih.gov/18317366/>  
10  
11  
12 24. Platat C, Jarrar A. Reliability and validity of a physical activity questionnaire in children.  
13  
14 *Int J Food Sci Nutr.* 2012;**63**(6):637-44. doi: 10.1249/MSS.0b013e3181620ed1PMID:  
15  
16 <https://pubmed.ncbi.nlm.nih.gov/22171691/>  
17  
18  
19 25. Greene GW, Resnicow K, Thompson FE, Peterson KE, Hurley TG, Hebert JR et al.  
20  
21 Correspondence of the NCI Fruit and Vegetable Screener to repeat 24-H recalls and  
22  
23 serum carotenoids in behavioral intervention trials. *J Nutr.* 2008;**138**(1):200S-204S.  
24  
25 <https://doi.org/10.1093/jn/138.1.200S>  
26  
27  
28 26. Thompson FE, Midthune D, Kahle L, Dodd KW. Development and evaluation of the  
29  
30 National Cancer Institute's dietary screener questionnaire scoring algorithms. *J Nutr.*  
31  
32 2017;**147**(6):1226-1233. <https://doi.org/10.3945/jn.116.246058>  
33  
34  
35 27. Alsunni AA, Badar A. Fruit and vegetable consumption and its determinants among  
36  
37 Saudi university students. *J Taibah Univ Sci.* 2015;**10**(2):201-207. .  
38  
39 <http://dx.doi.org/10.1016/j.jtumed.2014.11.003>  
40  
41  
42 28. World Health Organization. Waist circumference and waist-hip ratio: Report of a WHO  
43  
44 Expert Consultation Geneva, 8-11 December 2008. Available:  
45  
46 [https://apps.who.int/iris/bitstream/handle/10665/44583/9789241501491\\_eng.pdf?sequence](https://apps.who.int/iris/bitstream/handle/10665/44583/9789241501491_eng.pdf?sequence=1)  
47  
48 =1. [Accessed August 8 2019].  
49  
50  
51 29. Ashwell M. Charts to assess the health risks of obesity. *Open Obes J.* 2011;**3**:78-84.  
52  
53  
54 30. de Onis M, Onyango AW, Borghi E, Siyam A, Nishida C, Siekmann J. Development of a  
55  
56 WHO growth reference for school-aged children and adolescents. *Bull World Health Org.*  
57  
58  
59  
60

- 1  
2  
3 2007;**85**(9):660-667. doi:10.2471/BLT.07.043497PMID:  
4  
5 <https://pubmed.ncbi.nlm.nih.gov/18026621/>  
6  
7  
8 31. Center for disease controls and prevention. Defining childhood obesity. Available:  
9  
10 <https://www.cdc.gov/obesity/childhood/defining.html>. [Accessed 27 July 2020]  
11  
12 32. Zimmermann MB, Gübeli C, Püntener C, Molinari L. Detection of overweight and  
13  
14 obesity in national sample of 6-12-y-old Swiss children: Accuracy and validity of  
15  
16 reference values for body mass index from the US Centers for Disease Control and  
17  
18 Prevention and International Obesity Task Force. *Am J Clin Nutr.* 2004;**79**:838–43.  
19  
20 <https://doi.org/10.1093/ajcn/79.5.838>PMID: 27818779  
21  
22  
23 33. Center for Disease Control and Prevention. Body Mass Index: Considerations for  
24  
25 Practitioner: Available: <https://www.cdc.gov/obesity/downloads/bmiforpractitioners.pdf>.  
26  
27 [Accessed 27 July 2020]  
28  
29  
30 34. Kyle UG, Bosaeus I, De Lorenzo AD, Deurenberg P, Elia M, Gómez JM, et al.  
31  
32 Bioelectrical impedance analysis --part I: review of principles and methods. *Clin Nutr.*  
33  
34 2004;**23**(5):1226-1243. <https://doi.org/10.1093/ajcn/79.5.838>PMID:  
35  
36 <https://pubmed.ncbi.nlm.nih.gov/15380917/>  
37  
38  
39 35. von Hurst PR, Walsh DC, Conlon CA, Ingram M, Kruger R, Stonehouse W. Validity and  
40  
41 reliability of bioelectrical impedance analysis to estimate body fat percentage against air  
42  
43 displacement plethysmography and dual-energy X-ray absorptiometry. *Nutr Diet.*  
44  
45 2016;**73**(2):197-204. <https://doi.org/10.1111/1747-0080.12172>  
46  
47  
48 36. McCarthy HD, Samani-Radia D, Jebb SA, Prentice AM. Skeletal muscle mass reference  
49  
50 curves for children and adolescents. *Pediatr. Obes.* 2014;**9**(4):249-59.  
51  
52 doi:10.1111/j.2047-6310.2013.00168.x  
53  
54  
55 37. Bates D, Maechler M, Bolker B, Walker S, Christensen RH, Singmann H, Dai B, Scheipl  
56  
57 F. Package ‘lme4’. CRAN. R Foundation for Statistical Computing, Vienna, Austria.  
58  
59  
60

2012. Available: <https://cran.r-project.org/web/packages/lme4/lme4.pdf> [Accessed 27 July 2020]
38. Al-Hazzaa HM, Al-Sobayel HI, Musaiger AO. Convergent validity of the Arab Teens Lifestyle Study (ATLS) physical activity questionnaire. *Int J Environ Res Public Health*. 2011;**8**(9):3810-3820. <https://doi.org/10.3390/ijerph8093810> PMID: <https://www.ncbi.nlm.nih.gov/pmc/articles/PMC3194119/>
39. El-Bayoumy I, Shady I, Lotfy H. Prevalence of obesity among adolescents (10 to 14 years) in Kuwait. *Asia Pac J Public Health*. 2009;**21**(2):153-159. doi:10.1177/1010539509331786 PMID: <https://pubmed.ncbi.nlm.nih.gov/19190003/>
40. El-Kassas G, Ziade F. Exploration of the risk factors of generalized and central obesity among adolescents in North Lebanon. *J Environ Public Health*. 2017. Available: <https://www.ncbi.nlm.nih.gov/pubmed/29056975>. [Accessed March 25 2019].
41. Abolfotouh MA, Sallam SA, Mohammed MS, Loutfy AA, Hasab AA. Prevalence of elevated blood pressure and association with obesity in Egyptian school adolescents. *Int J Hypertens*. 2011; **2011**: 952537. doi: 10.4061/2011/952537 PMID: <https://www.ncbi.nlm.nih.gov/pmc/articles/PMC3057063/>
42. Galfo M, D'Addezio L, Censi L, Roccaldo R, Martone D. Overweight and obesity in Italian adolescents: Examined prevalence and socio-demographic factors. *Cent Eur J Public Health*. 2016;**24**(4):262-267. doi: 10.21101/cejph.a4367 PMID: <https://pubmed.ncbi.nlm.nih.gov/28095279/>
43. Krassas GE, Tzotzas T, Tsametis C, Konstantinidis T. Prevalence and trends in overweight and obesity among children and adolescents in Thessaloniki, Greece. *J Pediatr Endocrinol Metab*. 2001;**14**:1319-1326 PMID: 11964029 PMID: <http://europepmc.org/article/MED/11964029>

- 1  
2  
3 44. Bibiloni M, Pons A, Tur JA. Prevalence of overweight and obesity in adolescents: a  
4  
5 systematic review. *ISRN Obes.* 2013. Retrieved: [https://www.ncbi.nlm.nih.gov/](https://www.ncbi.nlm.nih.gov/pubmed/24555142)  
6  
7 [pubmed/24555142](https://www.ncbi.nlm.nih.gov/pubmed/24555142). [Accessed 27 July 2020].  
8  
9
- 10 45. Makansi N, Allison P, Awad M, Bedos C. Fruit and vegetable intake among Emirati  
11  
12 adolescents: a mixed methods study. *East Mediterr Health J.* 2018;**24**(7):653-663.  
13  
14 doi:10.26719/2018.24.7.653 PMID: <http://europepmc.org/article/MED/11964029>  
15  
16
- 17 46. World Health Organization. Global recommendations on physical activity for health.  
18  
19 (2010). joint WHO/FAO Expert Consultation. Diet, Nutrition and the Prevention of  
20  
21 Chronic Diseases. WHO Technical Report Series. Available: [https://](https://apps.who.int/iris/bitstream/handle/10665/42665/WHO_TRS_916.pdf?sequence=1)  
22  
23 [apps.who.int/iris/bitstream/handle/10665/42665/WHO\\_TRS\\_916.pdf?sequence=1](https://apps.who.int/iris/bitstream/handle/10665/42665/WHO_TRS_916.pdf?sequence=1).  
24  
25 [Accessed March 25 2019].  
26  
27
- 28 47. Dighe S, Lloyd K, Acciai F, Martinelli S, Yedidia MJ, Ohri-Vachaspati P. Healthier  
29  
30 school food and physical activity environments are associated with lower student body  
31  
32 mass index. *Preventive Medicine Reports.* 2020; **8**:101115.  
33  
34 doi:10.1016/j.pmedr.2020.101115  
35  
36
- 37 48. Gebreyohannes Y, Shiferaw S, Demtsu B, Bugssa G. Nutritional status of adolescents in  
38  
39 selected government and private secondary schools of Addis Ababa, Ethiopia.  
40  
41 *Adolescence.* 2014;**10**:11. doi:10.11648/j.ijnfs.20140306.13  
42  
43
- 44 49. Ferreira CS, Silva DA, Gontijo CA, Rinaldi AE. Consumption of minimally processed  
45  
46 and ultra-processed foods among students from public and private schools. *Revista*  
47  
48 *Paulista de Pediatria.* 2019;**37**(2):173-80. doi: 10.1590/1984-  
49  
50 0462/;2019;37;2;00010 PMID: <https://www.ncbi.nlm.nih.gov/pmc/articles/PMC6651319/>  
51  
52
- 53 50. de Bont J, Díaz Y, Casas M, García-Gil M, Vrijheid M, Duarte-Salles T. Time Trends  
54  
55 and Sociodemographic Factors Associated With Overweight and Obesity in Children and  
56  
57 Adolescents in Spain. *JAMA Network Open.* 2020;**3**: e201171- e201171.  
58  
59  
60

1  
2  
3 doi:10.1001/jamanetworkopen.2020.1171PMID:

4  
5  
6 <https://www.ncbi.nlm.nih.gov/pmc/articles/PMC7081120/>

7  
8 51. World Health Organization. 2020. Global recommendations on physical activity for health.

9  
10 Available: [https://www.who.int/dietphysicalactivity/factsheet\\_recommendations/en/](https://www.who.int/dietphysicalactivity/factsheet_recommendations/en/)

11  
12 52. Błaszczyk-Bębenek E, Piórecka B, Płonka M, Chmiel I, Jagielski P, Tuleja K, Schlegel-

13  
14 Zawadzka M. Risk Factors and Prevalence of Abdominal Obesity among Upper-

15  
16 Secondary Students. *Int J Env Res Pub He.* 2019;**16**(10):1750.

17  
18 doi:10.3390/ijerph16101750PMID:

19  
20  
21 <https://www.ncbi.nlm.nih.gov/pmc/articles/PMC6572187/>

22  
23 53. Zhao Y, Wang L, Xue B, Wang Y. Associations between general and central obesity and  
24  
25 hypertension among children: The Childhood Obesity Study in China Mega-Cities.

26  
27  
28 *Scientific reports.* 2017; **7**:1-7. doi:10.1038/s41598-017-16819-y

29  
30 54. Guilherme FR, Molena-Fernandes CA, Guilherme VR, Fávero MT, Reis EJ, Rinaldi W.

31  
32 Physical inactivity and anthropometric measures in schoolchildren from Paranavaí,

33  
34 Paraná, Brazil. *Revista Paulista de Pediatria.* 2015;**33**(1):50-55.

35  
36 doi:10.1016/j.rpped.2014.11.009PMID:<https://www.ncbi.nlm.nih.gov/pmc/articles/PMC4>

37  
38  
39 436956/  
40  
41  
42  
43  
44  
45  
46  
47  
48  
49  
50  
51  
52  
53  
54  
55  
56  
57  
58  
59  
60



**Figure 1** Flow diagram of data collection process and analysis



STROBE Statement—checklist of items that should be included in reports of observational studies

**Prevalence and determinants of overweight/obesity among school-aged adolescents in the United Arab Emirates: A cross sectional study of private and public schools**

|                           | Item No. | Recommendation                                                                                                                                  | Page No. | Relevant text from manuscript                                                                                                                                                                                                                                                                                                                                                                                                                                               |
|---------------------------|----------|-------------------------------------------------------------------------------------------------------------------------------------------------|----------|-----------------------------------------------------------------------------------------------------------------------------------------------------------------------------------------------------------------------------------------------------------------------------------------------------------------------------------------------------------------------------------------------------------------------------------------------------------------------------|
| <b>Title and abstract</b> | 1        | (a) Indicate the study's design with a commonly used term in the title or the abstract                                                          | 1        | See title page and abstract<br>Prevalence and determinants of overweight/obesity among school-aged adolescents in the United Arab Emirates: A cross sectional study of private and public schools                                                                                                                                                                                                                                                                           |
|                           |          | (b) Provide in the abstract an informative and balanced summary of what was done and what was found                                             | 2-3      | See abstract section                                                                                                                                                                                                                                                                                                                                                                                                                                                        |
| <b>Introduction</b>       |          |                                                                                                                                                 |          |                                                                                                                                                                                                                                                                                                                                                                                                                                                                             |
| Background/rationale      | 2        | Explain the scientific background and rationale for the investigation being reported                                                            | 5-7      | See background section                                                                                                                                                                                                                                                                                                                                                                                                                                                      |
| Objectives                | 3        | State specific objectives, including any prespecified hypotheses                                                                                | 7        | In this study, we explored the epidemiology of overweight and obesity in the total population and compared obesity figures between private and public schools. We also aimed to determine factors that contributed to overweight and obesity in participants including sociodemographic factors (sex, age, nationality, parents' employment and socioeconomic status); school type (public vs. private); and lifestyle factors (F/V consumption, physical activity levels). |
| <b>Methods</b>            |          |                                                                                                                                                 |          |                                                                                                                                                                                                                                                                                                                                                                                                                                                                             |
| Study design              | 4        | Present key elements of study design early in the paper                                                                                         | 7        | We adopted a quantitative correlational design                                                                                                                                                                                                                                                                                                                                                                                                                              |
| Setting                   | 5        | Describe the setting, locations, and relevant dates, including periods of recruitment, exposure, follow-up, and data collection                 | 7-8      | See subjects and methods                                                                                                                                                                                                                                                                                                                                                                                                                                                    |
| Participants              | 6        | (a) <i>Cohort study</i> —Give the eligibility criteria, and the sources and methods of selection of participants. Describe methods of follow-up |          |                                                                                                                                                                                                                                                                                                                                                                                                                                                                             |

|                              |    |                                                                                                                                                                                                                                                                                                                              |              |                                                                                                                                                                                                          |
|------------------------------|----|------------------------------------------------------------------------------------------------------------------------------------------------------------------------------------------------------------------------------------------------------------------------------------------------------------------------------|--------------|----------------------------------------------------------------------------------------------------------------------------------------------------------------------------------------------------------|
|                              |    | <p><i>Case-control study</i>—Give the eligibility criteria, and the sources and methods of case ascertainment and control selection. Give the rationale for the choice of cases and controls</p> <p><i>Cross-sectional study</i>—Give the eligibility criteria, and the sources and methods of selection of participants</p> | 8            |                                                                                                                                                                                                          |
|                              |    | <p>(b) <i>Cohort study</i>—For matched studies, give matching criteria and number of exposed and unexposed</p> <p><i>Case-control study</i>—For matched studies, give matching criteria and the number of controls per case</p>                                                                                              | Not relevant |                                                                                                                                                                                                          |
| Variables                    | 7  | Clearly define all outcomes, exposures, predictors, potential confounders, and effect modifiers. Give diagnostic criteria, if applicable                                                                                                                                                                                     | 9-11         | See measurement section (page 9-10), also data analysis section (page 11)                                                                                                                                |
| Data sources/<br>measurement | 8* | For each variable of interest, give sources of data and details of methods of assessment (measurement). Describe comparability of assessment methods if there is more than one group                                                                                                                                         | 9-10         | Full descriptions of all variables measured provided –under measurement section                                                                                                                          |
| Bias                         | 9  | Describe any efforts to address potential sources of bias                                                                                                                                                                                                                                                                    | 8-9, 11      | <p>We used trained research assistants</p> <p>The same research team collected the data</p> <p>Random selection of school through cluster sampling</p> <p>Multivariate logistic regression (page 11)</p> |
| Study size                   | 10 | Explain how the study size was arrived at                                                                                                                                                                                                                                                                                    | 8            | See last paragraph of participants and samples                                                                                                                                                           |

Continued on next page

|                        |     |                                                                                                                                                                                                                                                                                                           |                                                     |                                                                                                |
|------------------------|-----|-----------------------------------------------------------------------------------------------------------------------------------------------------------------------------------------------------------------------------------------------------------------------------------------------------------|-----------------------------------------------------|------------------------------------------------------------------------------------------------|
| Quantitative variables | 11  | Explain how quantitative variables were handled in the analyses.<br>If applicable, describe which groupings were chosen and why                                                                                                                                                                           | 11                                                  | Data analysis section                                                                          |
| Statistical methods    | 12  | (a) Describe all statistical methods, including those used to control for confounding                                                                                                                                                                                                                     | 11                                                  | Data analysis section                                                                          |
|                        |     | (b) Describe any methods used to examine subgroups and interactions                                                                                                                                                                                                                                       |                                                     |                                                                                                |
|                        |     | (c) Explain how missing data were addressed                                                                                                                                                                                                                                                               | 11                                                  | Results section, paragraph 1<br>Missing and incomplete data were eliminated from the analyses. |
|                        |     | (d) <i>Cohort study</i> —If applicable, explain how loss to follow-up was addressed<br><i>Case-control study</i> —If applicable, explain how matching of cases and controls was addressed<br><i>Cross-sectional study</i> —If applicable, describe analytical methods taking account of sampling strategy | 11                                                  |                                                                                                |
|                        |     | (e) Describe any sensitivity analyses                                                                                                                                                                                                                                                                     | NA                                                  |                                                                                                |
| <b>Results</b>         |     |                                                                                                                                                                                                                                                                                                           |                                                     |                                                                                                |
| Participants           | 13* | (a) Report numbers of individuals at each stage of study—eg numbers potentially eligible, examined for eligibility, confirmed eligible, included in the study, completing follow-up, and analysed                                                                                                         | 11                                                  | Results section, paragraph 1                                                                   |
|                        |     | (b) Give reasons for non-participation at each stage                                                                                                                                                                                                                                                      | 11                                                  | Results section, paragraph 1                                                                   |
|                        |     | (c) Consider use of a flow diagram                                                                                                                                                                                                                                                                        | Included as separate file<br><br>(available online) | Figure 1                                                                                       |
| Descriptive data       | 14* | (a) Give characteristics of study participants (eg demographic, clinical, social) and information on exposures and potential confounders                                                                                                                                                                  | 11-12                                               | Participants' characteristics and obesity-related indices<br>Table 1                           |
|                        |     | (b) Indicate number of participants with missing data for each variable of interest                                                                                                                                                                                                                       | NA                                                  |                                                                                                |
|                        |     | (c) <i>Cohort study</i> —Summarise follow-up time (eg, average and total amount)                                                                                                                                                                                                                          | NA                                                  |                                                                                                |

1  
2  
3  
4  
5  
6  
7  
8  
9  
10  
11  
12  
13  
14  
15  
16  
17  
18  
19  
20  
21  
22  
23  
24  
25  
26  
27  
28  
29  
30  
31  
32  
33  
34  
35  
36  
37  
38  
39  
40  
41  
42  
43  
44  
45  
46

|              |     |                                                                                                                                                                                                              |       |                 |
|--------------|-----|--------------------------------------------------------------------------------------------------------------------------------------------------------------------------------------------------------------|-------|-----------------|
| Outcome data | 15* | <i>Cohort study</i> —Report numbers of outcome events or summary measures over time                                                                                                                          | NA    |                 |
|              |     | <i>Case-control study</i> —Report numbers in each exposure category, or summary measures of exposure                                                                                                         | NA    |                 |
|              |     | <i>Cross-sectional study</i> —Report numbers of outcome events or summary measures                                                                                                                           | 11-17 | Results section |
| Main results | 16  | (a) Give unadjusted estimates and, if applicable, confounder-adjusted estimates and their precision (eg, 95% confidence interval). Make clear which confounders were adjusted for and why they were included | 11-17 | Results section |
|              |     | (b) Report category boundaries when continuous variables were categorized                                                                                                                                    | 11-17 | Results section |
|              |     | (c) If relevant, consider translating estimates of relative risk into absolute risk for a meaningful time period                                                                                             | NA    |                 |

Continued on next page

For peer review only

|                          |    |                                                                                                                                                                            |       |                                                                                                                                                                 |
|--------------------------|----|----------------------------------------------------------------------------------------------------------------------------------------------------------------------------|-------|-----------------------------------------------------------------------------------------------------------------------------------------------------------------|
| Other analyses           | 17 | Report other analyses done—eg analyses of subgroups and interactions, and sensitivity analyses                                                                             | NA    |                                                                                                                                                                 |
| <b>Discussion</b>        |    |                                                                                                                                                                            |       |                                                                                                                                                                 |
| Key results              | 18 | Summarise key results with reference to study objectives                                                                                                                   | 16-20 | Discussion section                                                                                                                                              |
| Limitations              | 19 | Discuss limitations of the study, taking into account sources of potential bias or imprecision. Discuss both direction and magnitude of any potential bias                 | 21    | See strengths limitation section                                                                                                                                |
| Interpretation           | 20 | Give a cautious overall interpretation of results considering objectives, limitations, multiplicity of analyses, results from similar studies, and other relevant evidence | 21    | See strengths limitation section                                                                                                                                |
| Generalisability         | 21 | Discuss the generalisability (external validity) of the study results                                                                                                      | 21    | See strengths limitation section                                                                                                                                |
| <b>Other information</b> |    |                                                                                                                                                                            |       |                                                                                                                                                                 |
| Funding                  | 22 | Give the source of funding and the role of the funders for the present study and, if applicable, for the original study on which the present article is based              | 21    | This research was funded by the University of Sharjah/Research Institute for Medical and Health Sciences\ Health Promotion Research Group (Grant number 150310) |

\*Give information separately for cases and controls in case-control studies and, if applicable, for exposed and unexposed groups in cohort and cross-sectional studies.

**Note:** An Explanation and Elaboration article discusses each checklist item and gives methodological background and published examples of transparent reporting. The STROBE checklist is best used in conjunction with this article (freely available on the Web sites of PLoS Medicine at <http://www.plosmedicine.org/>, Annals of Internal Medicine at <http://www.annals.org/>, and Epidemiology at <http://www.epidem.com/>). Information on the STROBE Initiative is available at [www.strobe-statement.org](http://www.strobe-statement.org).
